# Supplementary material
Source: publisher figshare collection journal article supplement (https://acs.figshare.com/ndownloader/files/3721198)
Supplement: Supplementary file 1 [file 3721198]

# Supporting Information

## Synthesis and Mechanism Studies of 1,3-Benzoazolyl Substitued Pyrrolo[2,3-*b*]pyrazine Derivatives as Non-intercalative Topoisomerase II Catalytic Inhibitors

Peng-Hui Li, Ping Zeng, Shuo-Bin Chen, Pei-Fen Yao, Yan-Wen Mai, Jia-Heng Tan, Tian-Miao Ou,  
Shi-Liang Huang\*, Ding Li, Liang-Quan Gu, Zhi-Shu Huang\*

*School of Pharmaceutical Sciences, Sun Yat-sen University, Guangzhou, 510006, China*

\* To whom correspondence should be addressed. Phone: 8620-39943056. Fax: 8620-39943056.

E-mail: ceshzs@mail.sysu.edu.cn.

### Contents

|                                                                                                             |               |
|-------------------------------------------------------------------------------------------------------------|---------------|
| ✧ <b>Figure S1.</b> Topo I-mediated DNA relaxation assay                                                    | <b>S2</b>     |
| ✧ <b>Figure S2.</b> EB displacement assay                                                                   | <b>S3</b>     |
| ✧ <b>Figure S3.</b> UV-vis titration assay                                                                  | <b>S4</b>     |
| ✧ <sup>1</sup> H NMR spectra - <sup>13</sup> C NMR spectra- HPLC spectra – HRMS spectra of target compounds | <b>S5-S92</b> |
| ✧ References                                                                                                | <b>S93</b>    |

**Topo I-mediated DNA relaxation assay.** Topo I-mediated DNA relaxation assay was performed to test whether BPPs act as a dual inhibitor of Topo I and Topo II.<sup>1,2</sup> The result was presented at Figure S1. All of the synthesized compounds had no Topo I inhibitory activity at 50  $\mu$ M.

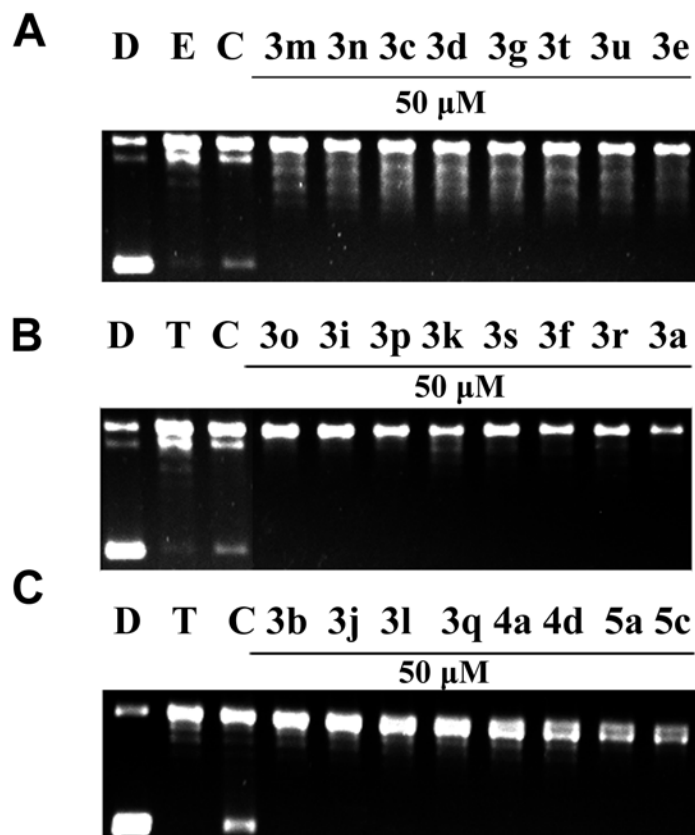

**Figure S1.** Topo I inhibitory activity of BPPs. (A), (B) and (C) lane **D**: pBR322 DNA; lane **T**: pBR322 DNA + Topo I; lane **C**: pBR322 DNA + Topo I + Camptothecin (100  $\mu$ M) other lanes: pBR322 DNA + Topo I + BPPs (50  $\mu$ M).

**EB displacement assay.** The ability of **3t** to interact with DNA was also confirmed by fluorescence-based EB displacement assay (Figure S2). The DNA bound form of EB has a stronger fluorescence emission than free EB, so the displacement of EB from DNA could be monitored by a decrease in the fluorescence signal.<sup>6</sup> As expected, the addition of the DNA intercalator mAMSA was accompanied by a concomitant decrease in EB fluorescence (Figure S2A). In contrast, the addition of increasing concentration of **3t** did not alter the intensity of EB fluorescence (Figure S2B), indicating that **3t** was incapable of intercalating into DNA.

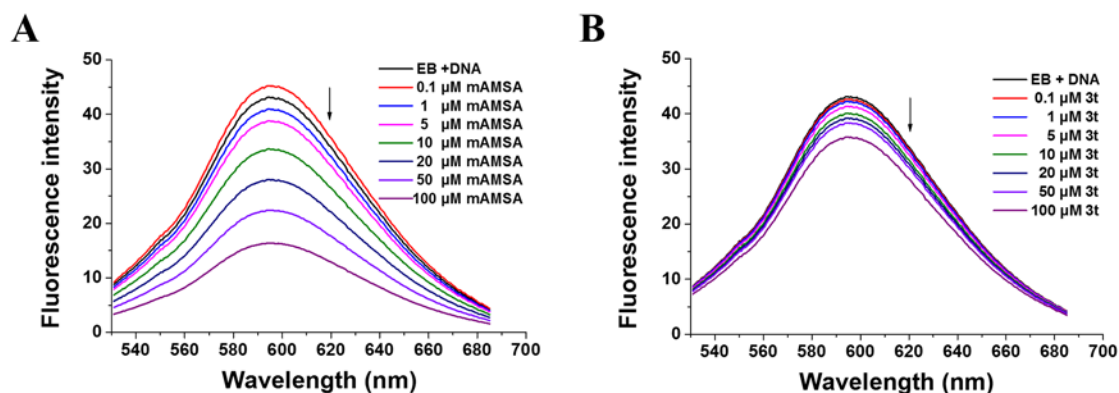

**Figure S2.** (A) and (B) pBR322 DNA (20 nM) was incubated in the presence of EB (2.5 μM). Arrow indicates the fluorescence intensity change upon increasing concentrations of mAMSA (A) or **3t** (B).

**UV-vis titration assay.** UV-vis titration was employed to measure the binding affinity of BPPs to CT-DNA. Generally, interaction between compounds and DNA would result in hypochromic effect and red shifts in the absorption spectrum due to the strong stacking interaction between the aromatic chromophore of the compounds and the base pair of DNA, and the electron transfer effect in the process.<sup>3, 4</sup> As showed in Figure S3A, with the increasing addition of CT-DNA to compound **3t** resulted in a hypochromic effect, but without an obvious red shifts, which was different from the classical intercalation interaction. The apparent binding constant ( $K_b$ ) to CT-DNA was determined to be  $2.8 \times 10^5 \text{ M}^{-1}$  (Figure S3B), means that BPPs showed weak interaction with CT-DNA. This is consistent with the results obtained from the unwinding assay.

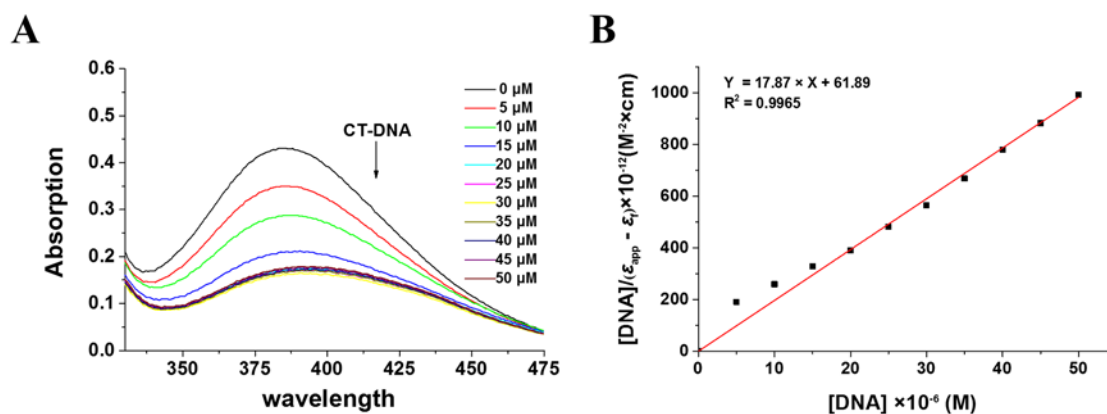

**Figure S3.** (A) Absorption spectra of compound **3t** upon addition of CT-DNA. [Compound **3t**] = 5 μM, [DNA] = 0 – 50 μM. Arrow indicates the absorption change upon increasing amount of CT-DNA. (B) Graph shows the plot of  $[DNA]/(\epsilon_a - \epsilon_f)$  versus [DNA].

**$^1\text{H}$  NMR,  $^{13}\text{C}$  NMR, HRMS, and HPLC analysis of compounds.**

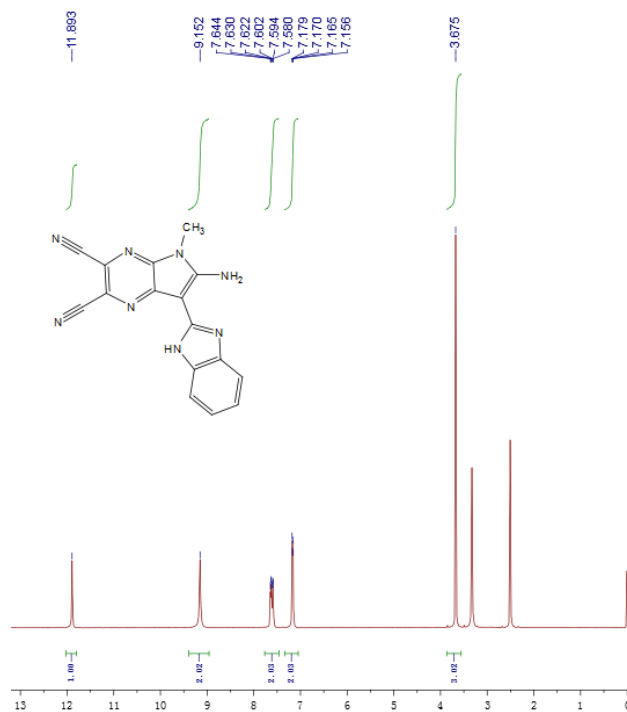

$^1\text{H}$  NMR (400 MHz, DMSO- $d_6$ ) of **3a**

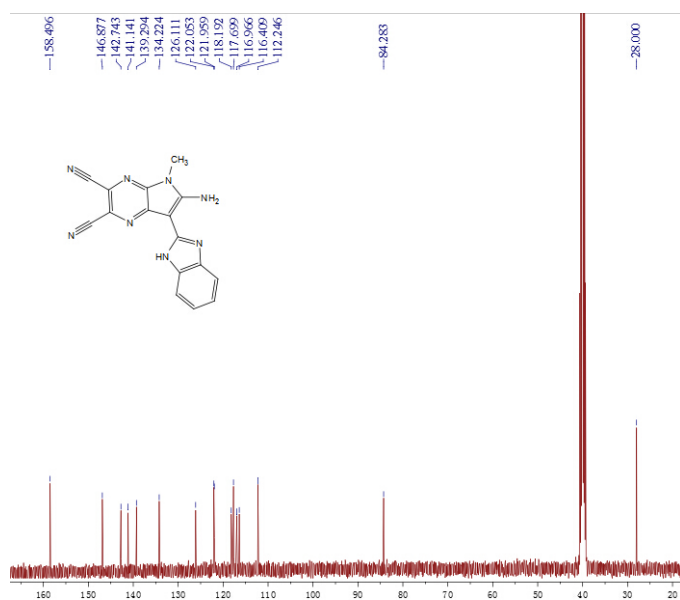

$^{13}\text{C}$  NMR (100 MHz, DMSO- $d_6$ ) of **3a**

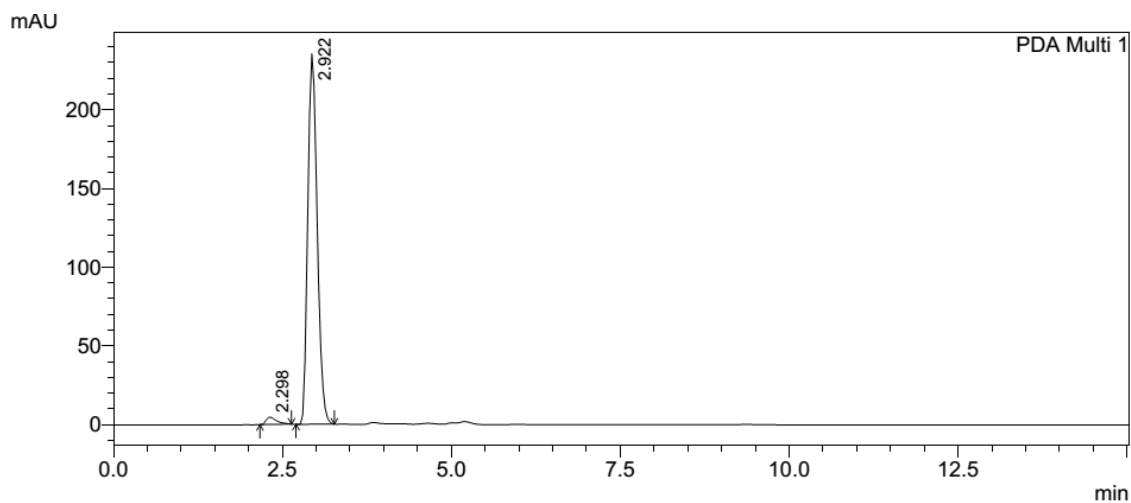

PeakTable

| Peak# | Ret. Time | Area    | Height | Area %  | Height % |
|-------|-----------|---------|--------|---------|----------|
| 1     | 2.298     | 51581   | 4682   | 2.208   | 1.951    |
| 2     | 2.922     | 2284804 | 235341 | 97.792  | 98.049   |
| Total |           | 2336385 | 240023 | 100.000 | 100.000  |

HPLC spectrum of **3a**

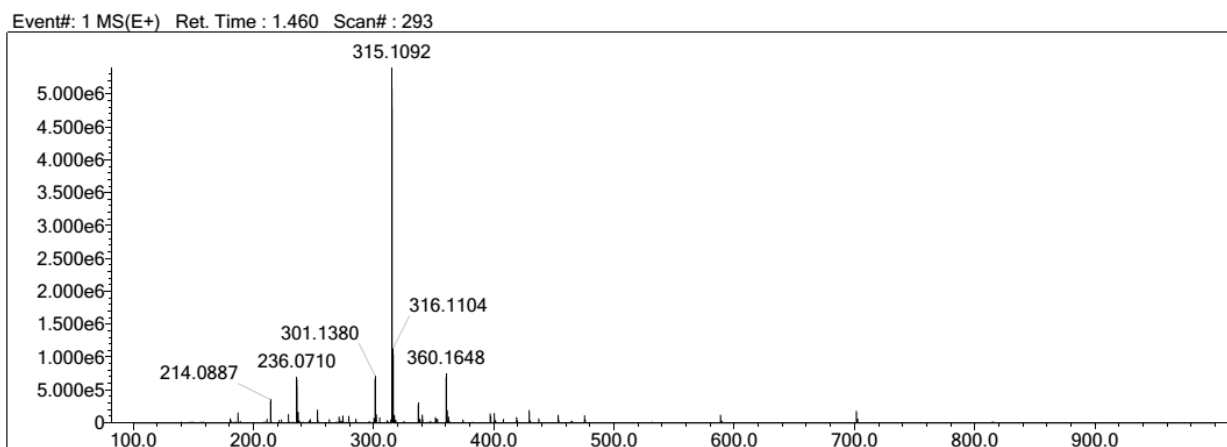

HRMS spectrum of **3a**

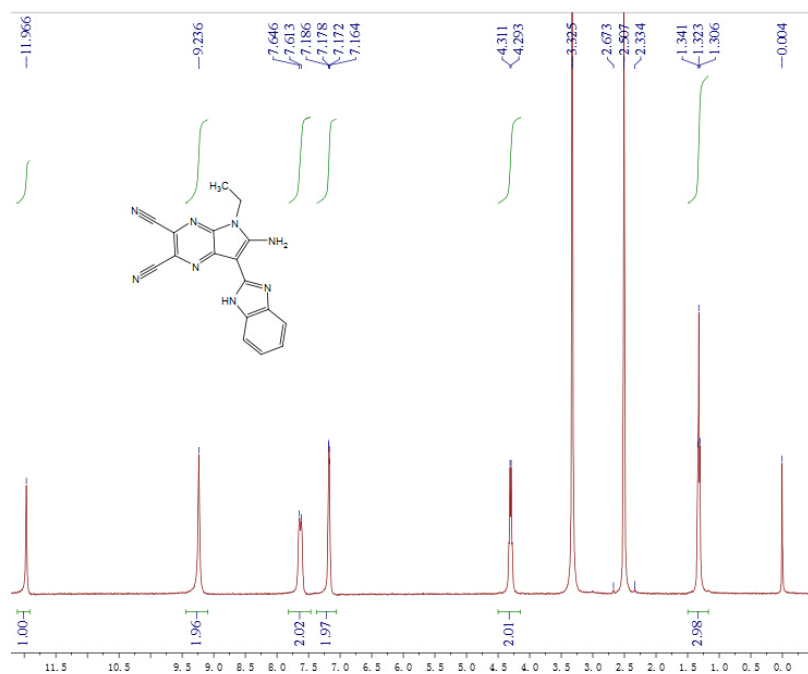

<sup>1</sup>H NMR (400 MHz, DMSO-*d*<sub>6</sub>) of **3b**

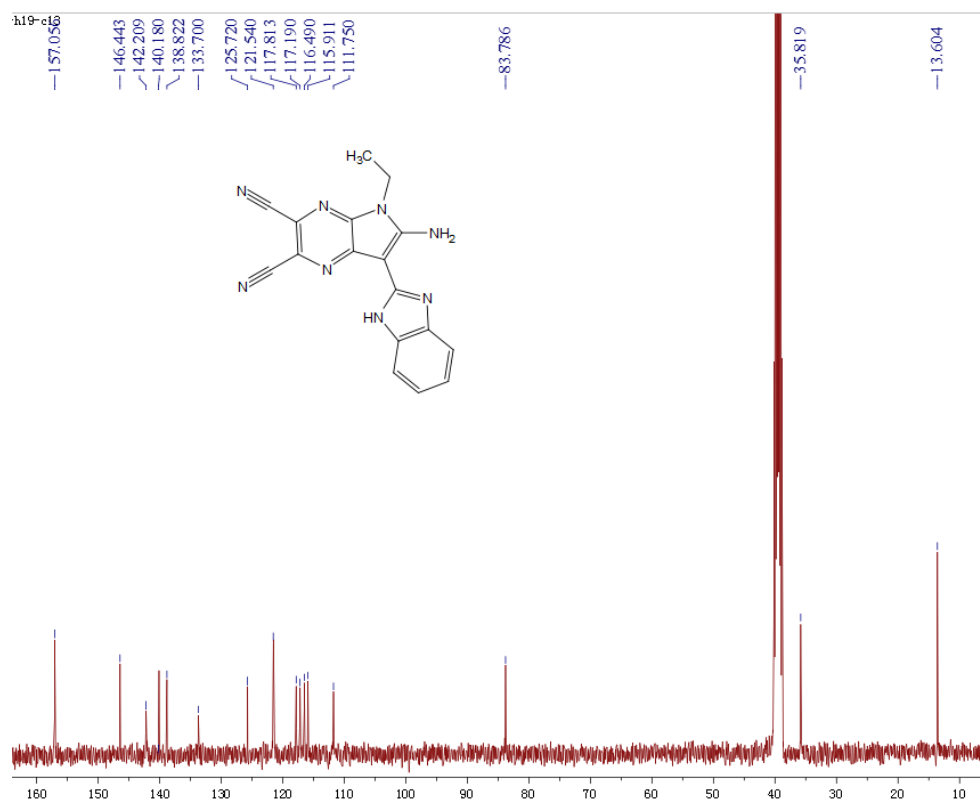

<sup>13</sup>C NMR (100 MHz, DMSO-*d*<sub>6</sub>) of **3b**

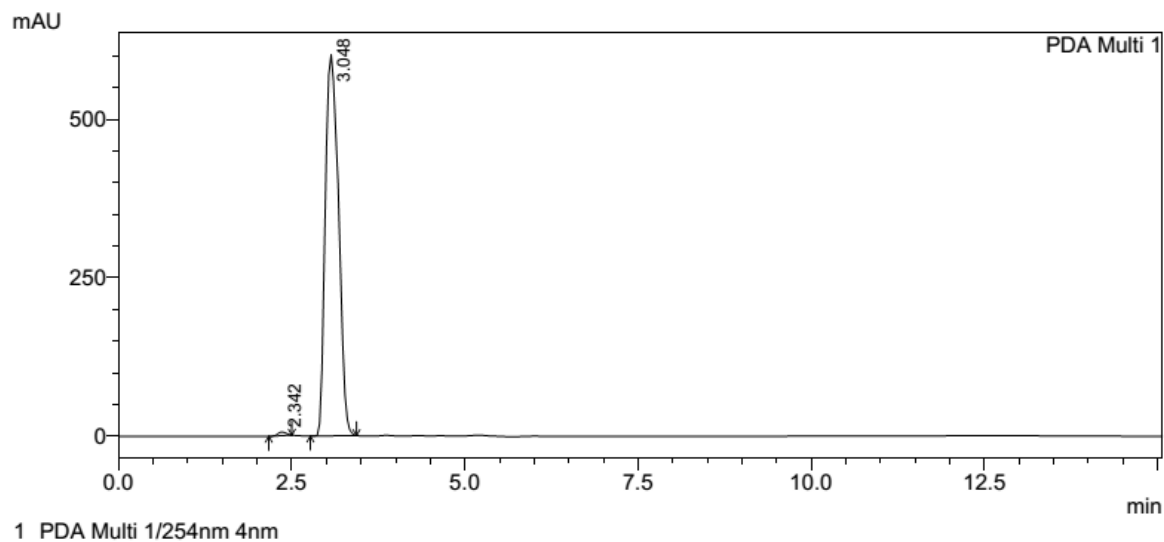

PeakTable

| Peak# | Ret. Time | Area    | Height | Area %  | Height % |
|-------|-----------|---------|--------|---------|----------|
| 1     | 2.342     | 48688   | 5864   | 0.606   | 0.965    |
| 2     | 3.048     | 7982812 | 601737 | 99.394  | 99.035   |
| Total |           | 8031500 | 607601 | 100.000 | 100.000  |

HPLC spectrum of **3b**

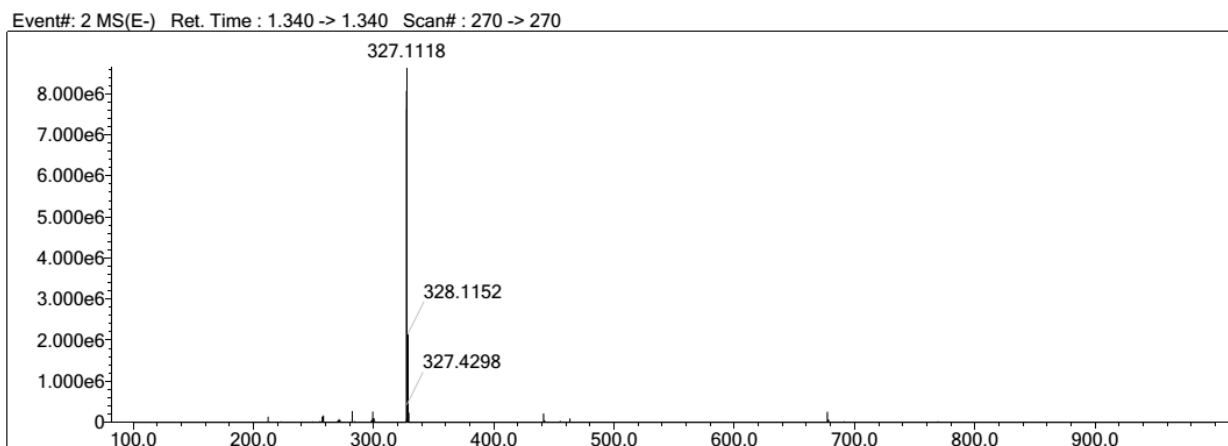

HRMS spectrum of **3b**



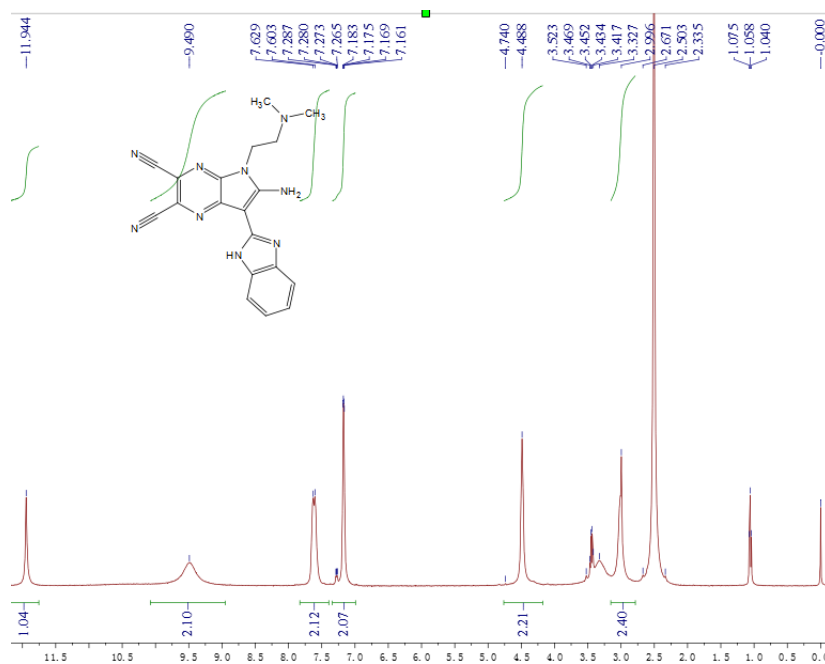

<sup>1</sup>H NMR (400 MHz, DMSO-*d*<sub>6</sub>) of **3c**

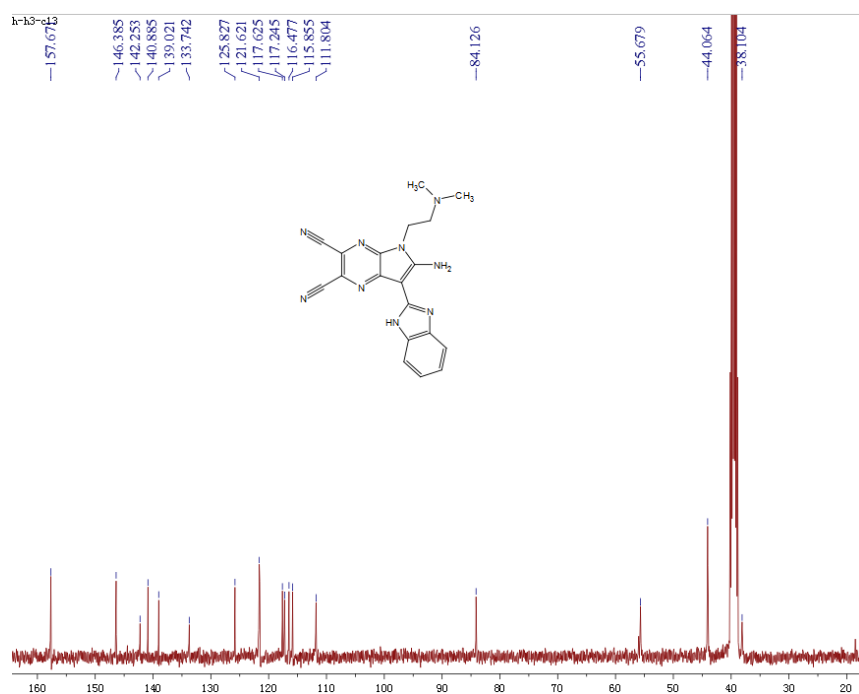

<sup>13</sup>C NMR (100 MHz, DMSO-*d*<sub>6</sub>) of **3c**

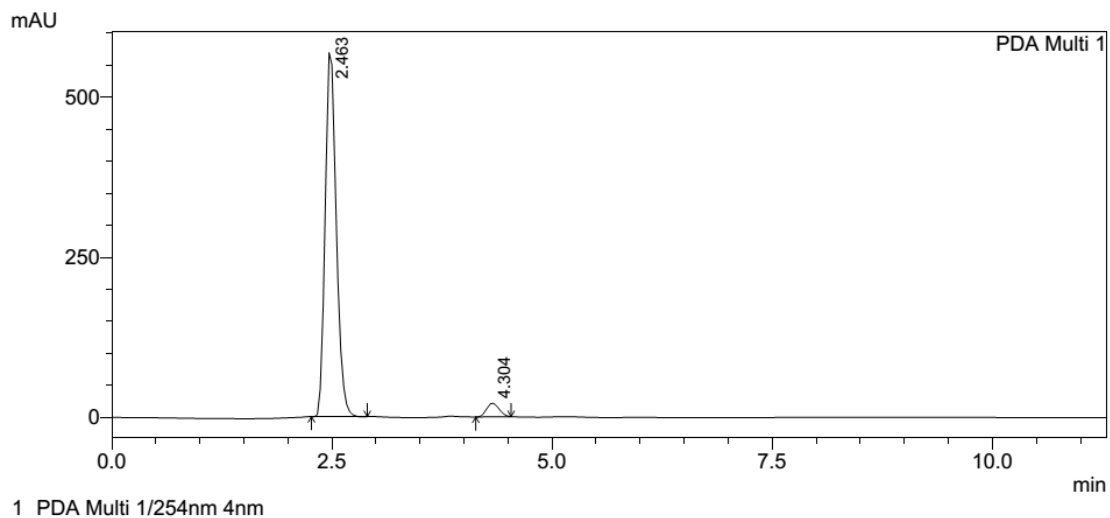

PeakTable

| Peak# | Ret. Time | Area    | Height | Area %  | Height % |
|-------|-----------|---------|--------|---------|----------|
| 1     | 2.463     | 5002713 | 568967 | 95.951  | 96.419   |
| 2     | 4.304     | 211085  | 21133  | 4.049   | 3.581    |
| Total |           | 5213799 | 590100 | 100.000 | 100.000  |

HPLC spectrum of **3c**

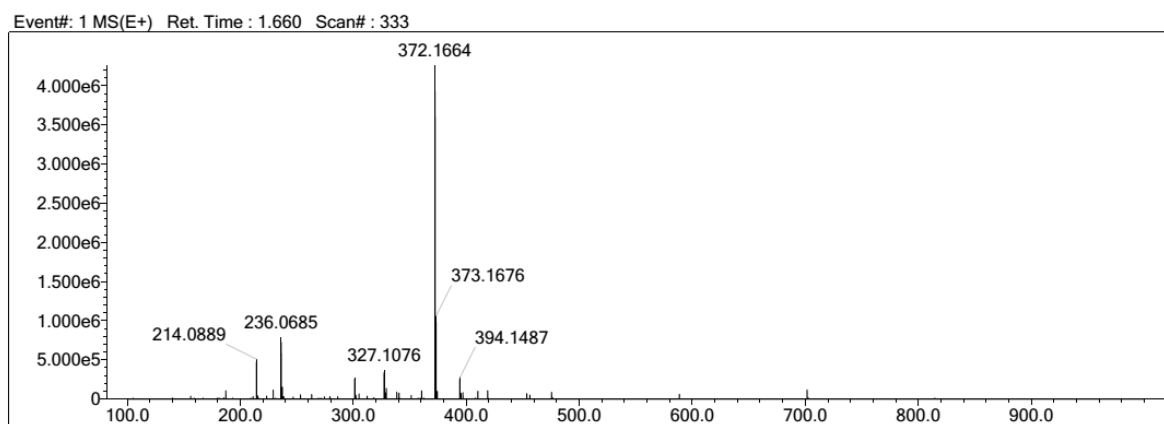

HRMS spectrum of **3c**

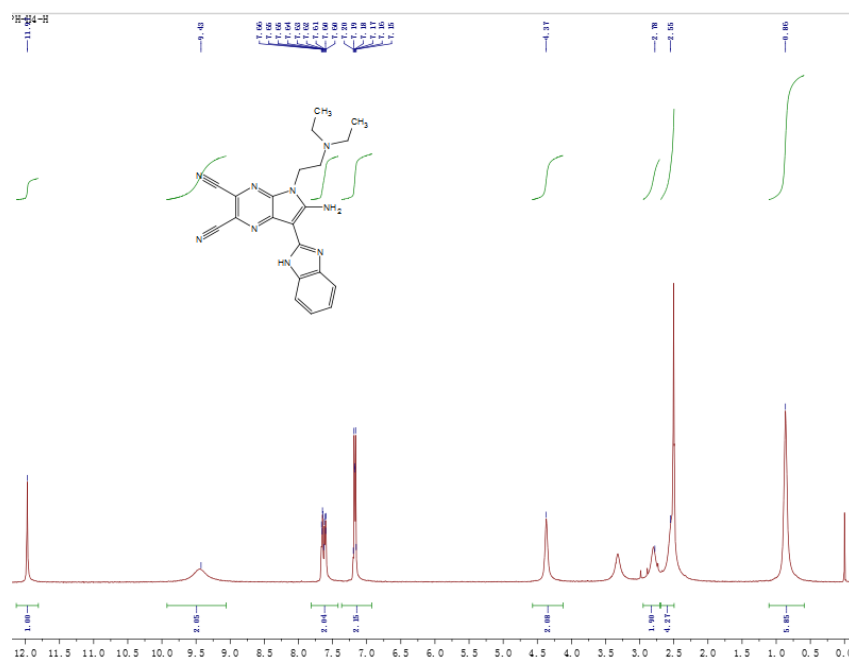

<sup>1</sup>H NMR (400 MHz, DMSO-*d*<sub>6</sub>) of **3d**

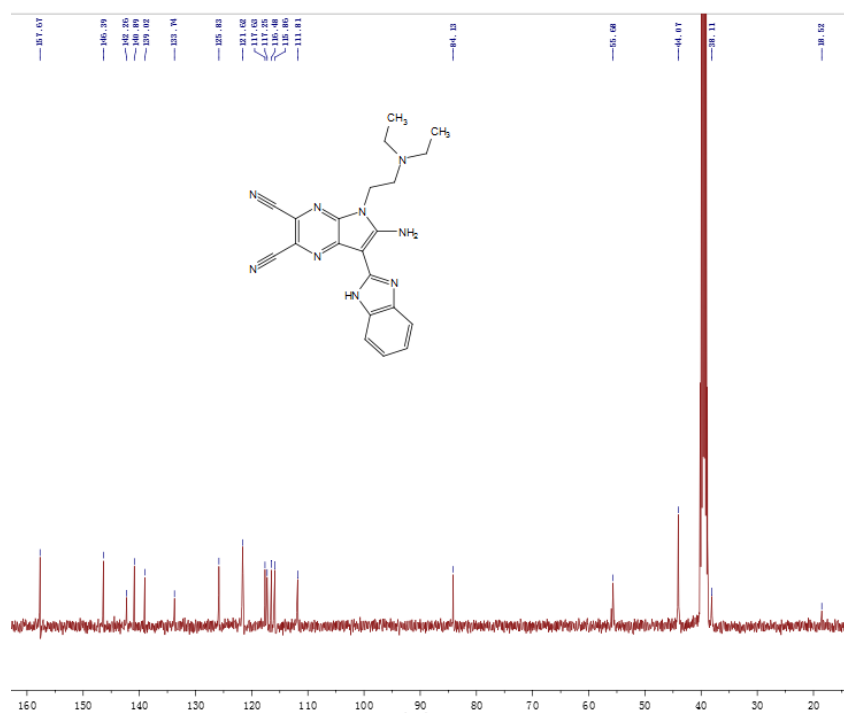

<sup>13</sup>C NMR (100 MHz, DMSO-*d*<sub>6</sub>) of **3d**

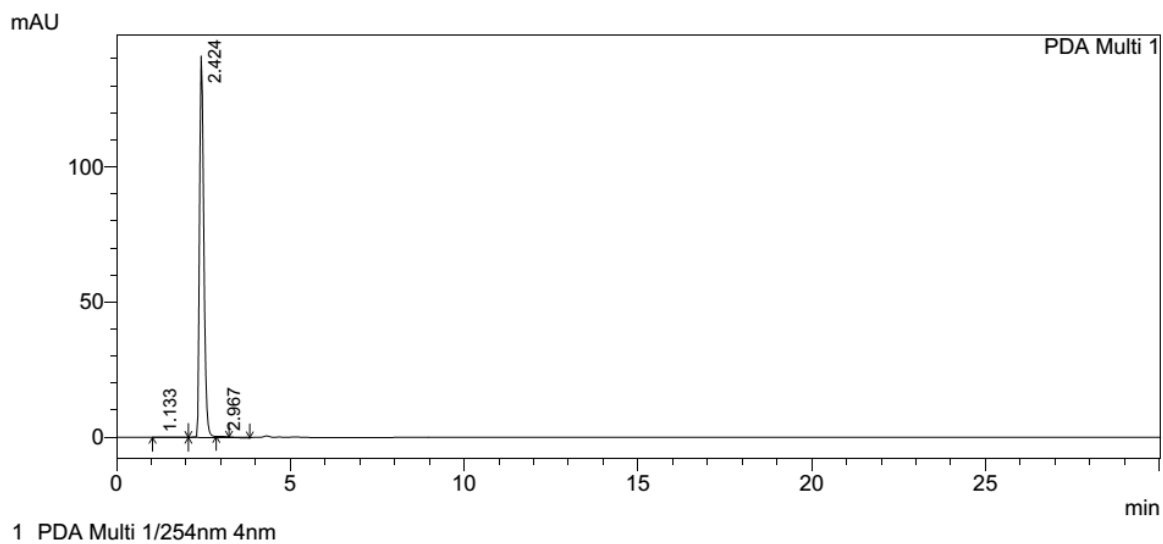

PeakTable

PDA Ch1 254nm 4nm

| Peak# | Ret. Time | Area    | Height | Area %  | Height % |
|-------|-----------|---------|--------|---------|----------|
| 1     | 1.133     | 1063    | 20     | 0.087   | 0.014    |
| 2     | 2.424     | 1225783 | 141166 | 99.816  | 99.891   |
| 3     | 2.967     | 1199    | 134    | 0.098   | 0.095    |
| Total |           | 1228044 | 141320 | 100.000 | 100.000  |

HPLC spectrum of **3d**

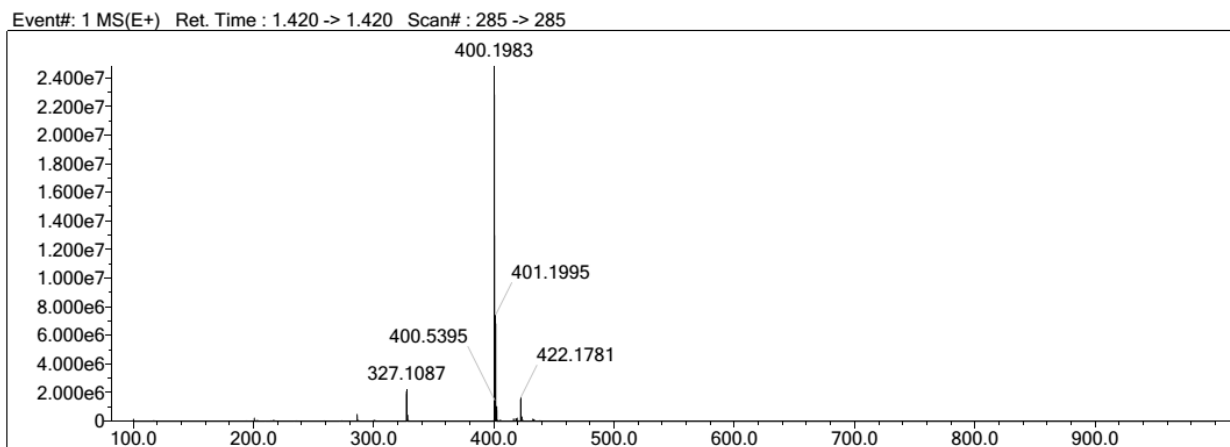

HRMS spectrum of **3d**

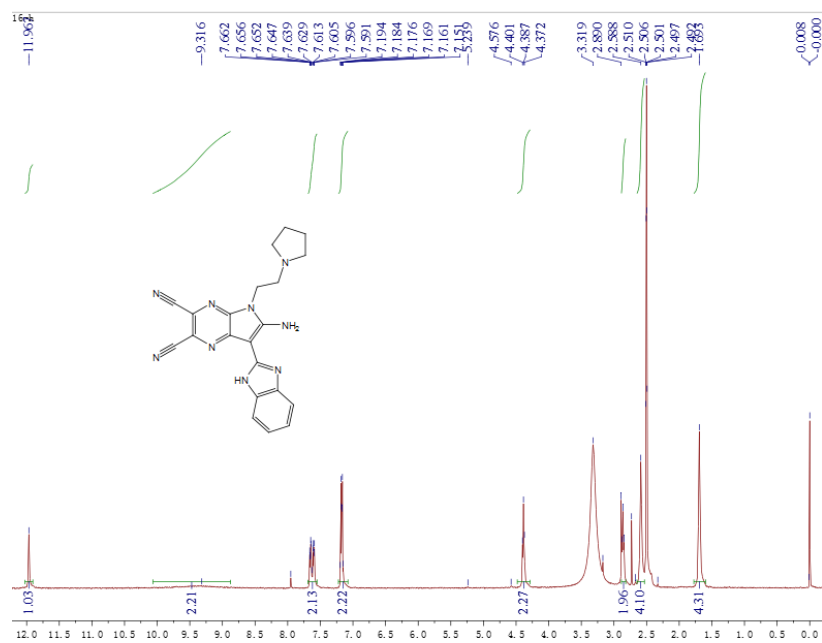

<sup>1</sup>H NMR (400 MHz, DMSO-*d*<sub>6</sub>) of **3e**

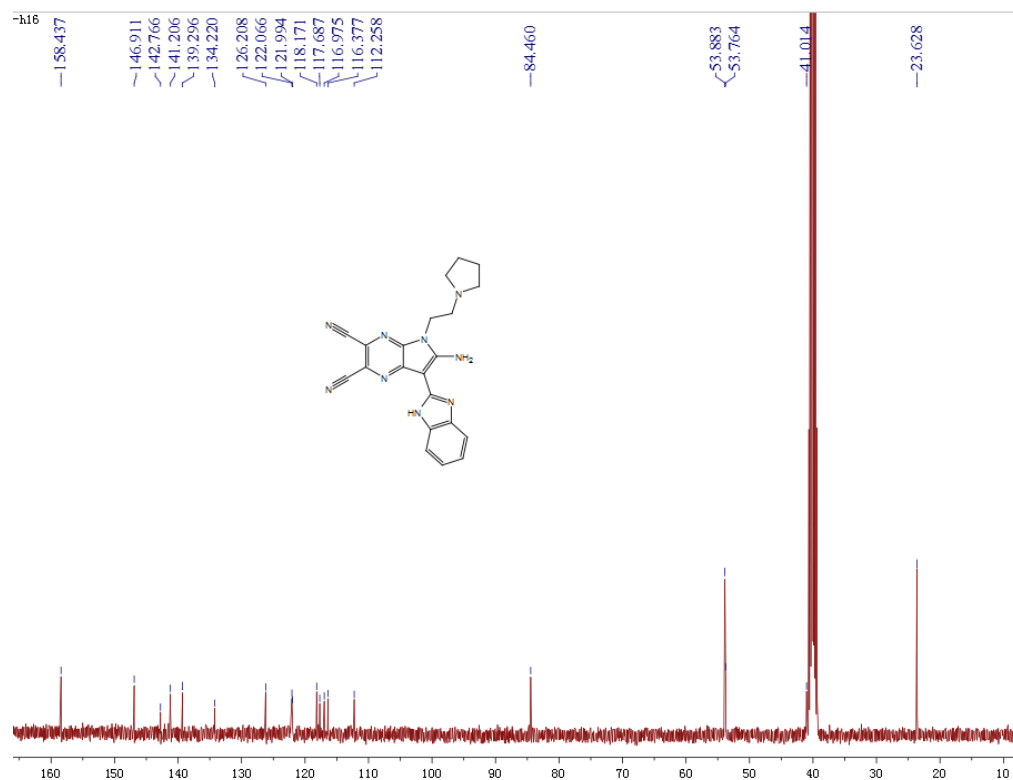

<sup>13</sup>C NMR (100 MHz, DMSO-*d*<sub>6</sub>) of **3e**

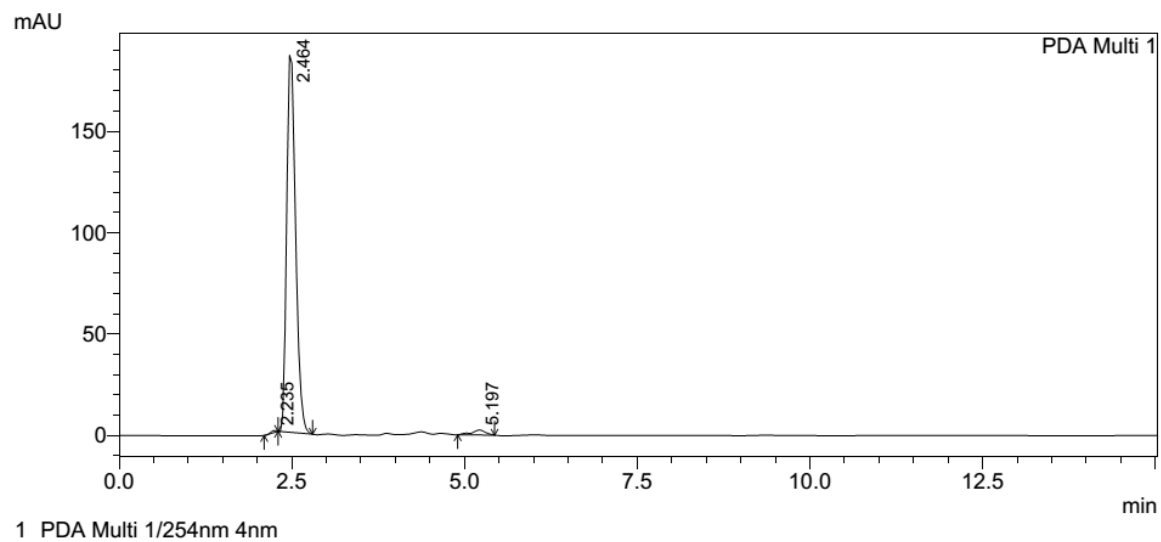

PeakTable

PDA Ch1 254nm 4nm

| Peak# | Ret. Time | Area    | Height | Area %  | Height % |
|-------|-----------|---------|--------|---------|----------|
| 1     | 2.235     | 7490    | 1099   | 0.438   | 0.580    |
| 2     | 2.464     | 1670709 | 185942 | 97.612  | 98.145   |
| 3     | 5.197     | 33380   | 2415   | 1.950   | 1.275    |
| Total |           | 1711579 | 189456 | 100.000 | 100.000  |

### HPLC spectrum of **3e**

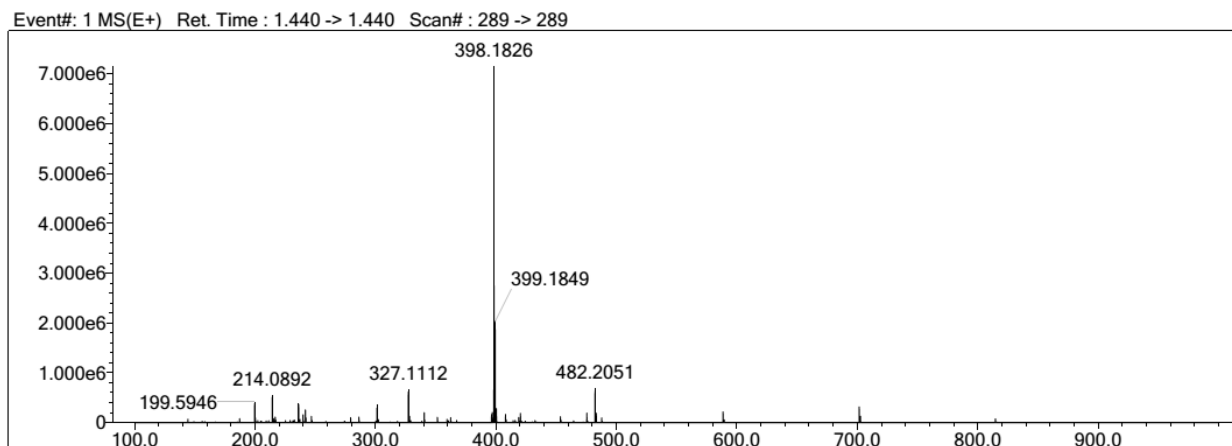

### HRMS spectrum of **3e**

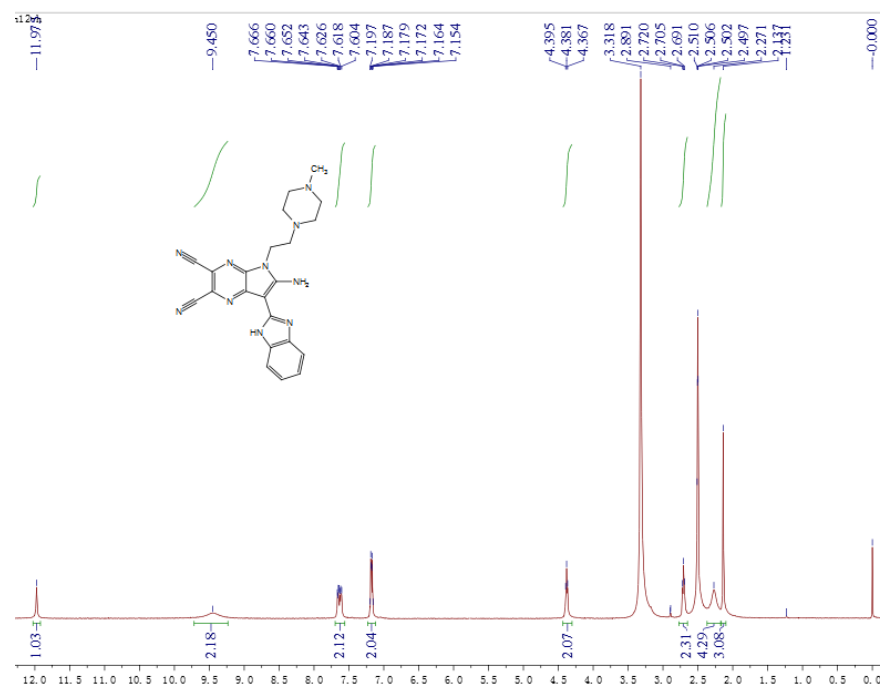

<sup>1</sup>H NMR (400 MHz, DMSO-*d*<sub>6</sub>) of **3f**

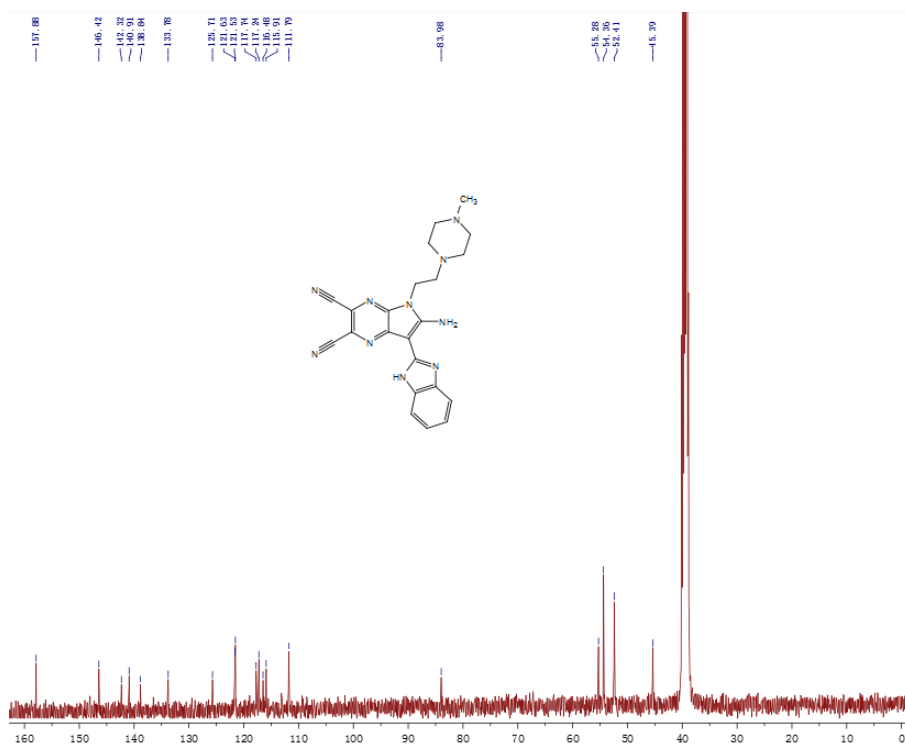

<sup>13</sup>C NMR (100 MHz, DMSO-*d*<sub>6</sub>) of **3f**

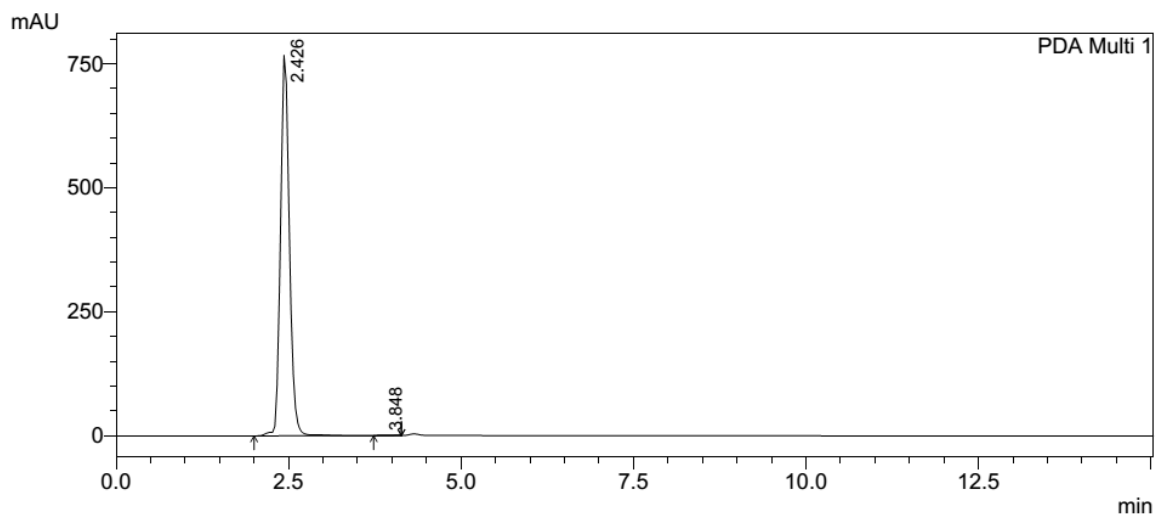

1 PDA Multi 1/254nm 4nm

PeakTable

| Peak# | Ret. Time | Area    | Height | Area %  | Height % |
|-------|-----------|---------|--------|---------|----------|
| 1     | 2.426     | 6912189 | 767448 | 99.816  | 99.882   |
| 2     | 3.848     | 12720   | 906    | 0.184   | 0.118    |
| Total |           | 6924909 | 768354 | 100.000 | 100.000  |

HPLC spectrum of **3f**

Event#: 1 MS(E+) Ret. Time : 1.470 -> 1.470 Scan#: 295 -> 295

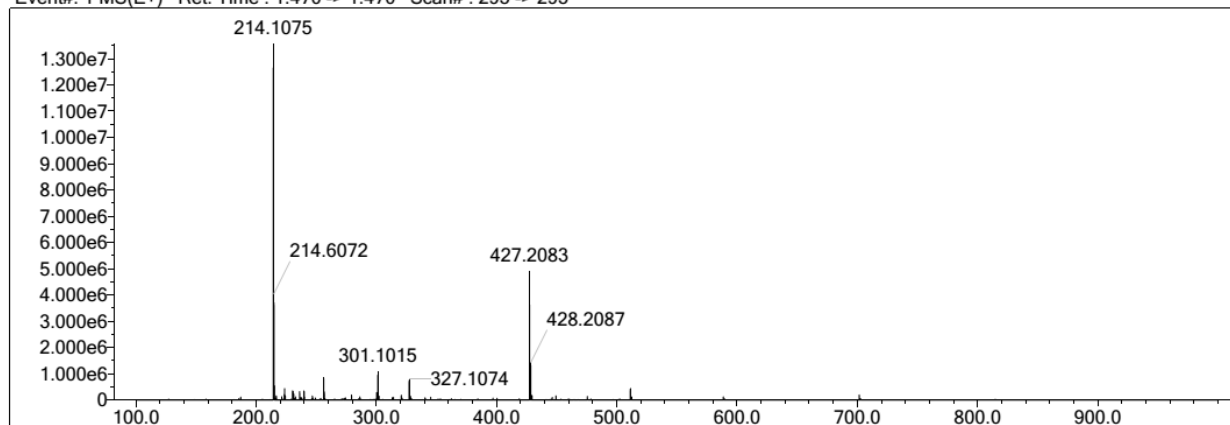

HRMS spectrum of **3f**



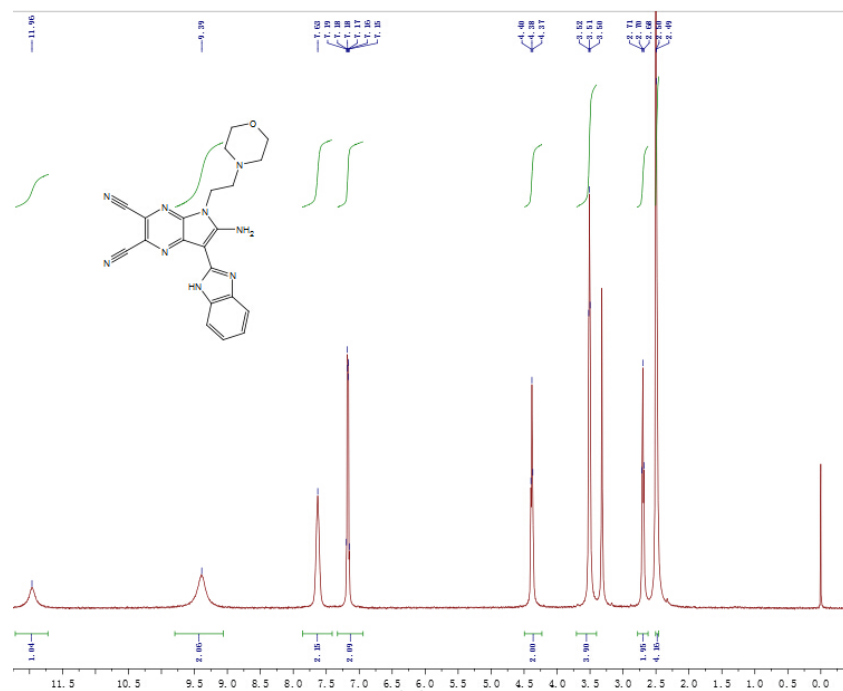

<sup>1</sup>H NMR (400 MHz, DMSO-*d*<sub>6</sub>) of **3g**

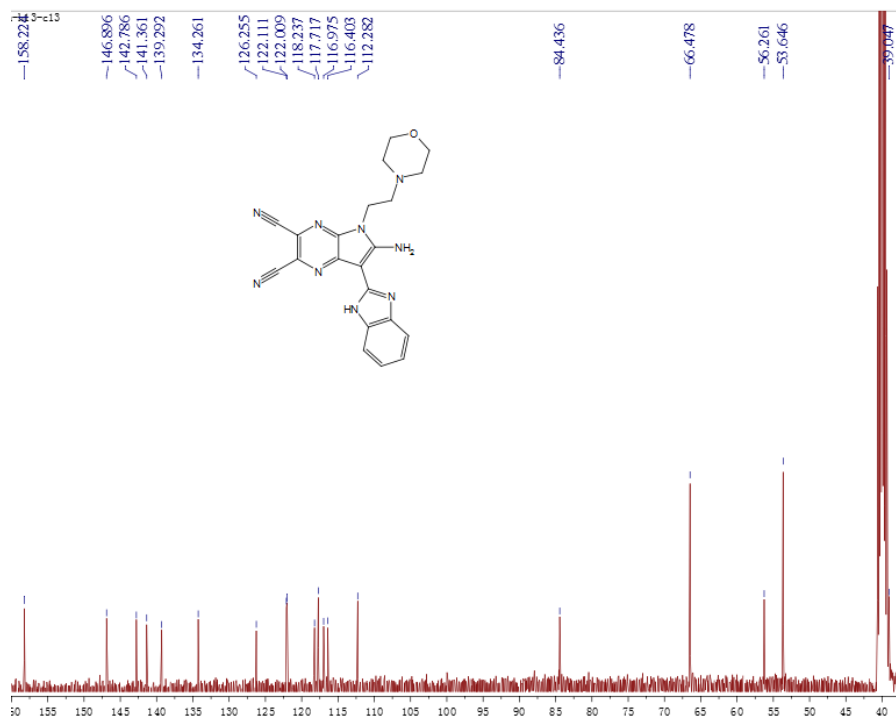

<sup>13</sup>C NMR (100 MHz, DMSO-*d*<sub>6</sub>) of **3g**

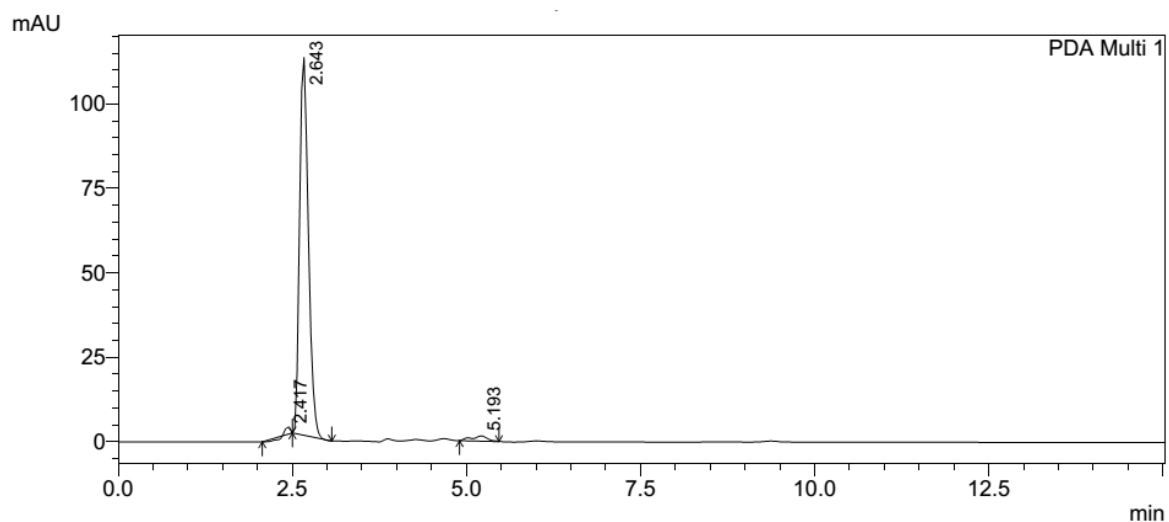

PeakTable

| Peak# | Ret. Time | Area    | Height | Area %  | Height % |
|-------|-----------|---------|--------|---------|----------|
| 1     | 2.417     | 4789    | 2177   | 0.473   | 1.885    |
| 2     | 2.643     | 983937  | 111775 | 97.094  | 96.763   |
| 3     | 5.193     | 24659   | 1562   | 2.433   | 1.352    |
| Total |           | 1013385 | 115515 | 100.000 | 100.000  |

HPLC spectrum of **3g**

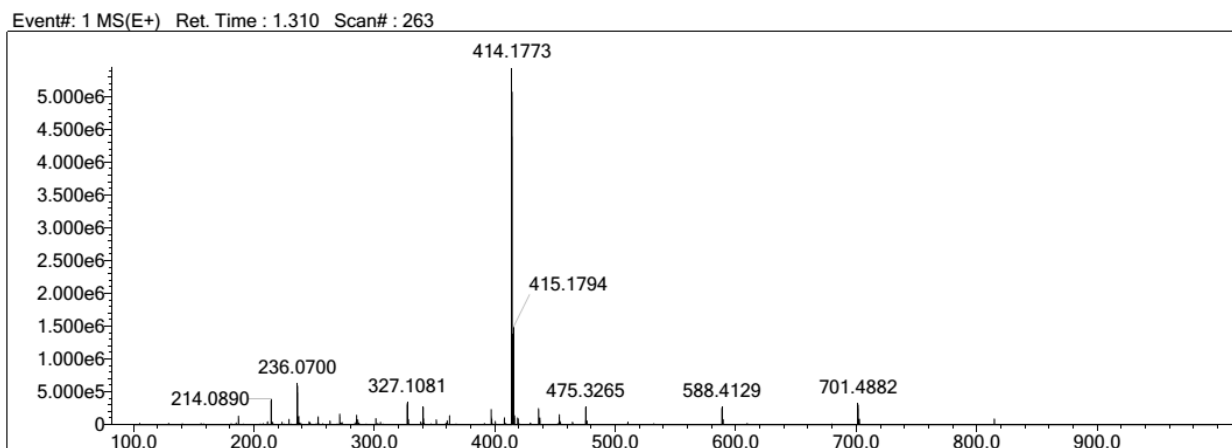

HRMS spectrum of **3g**

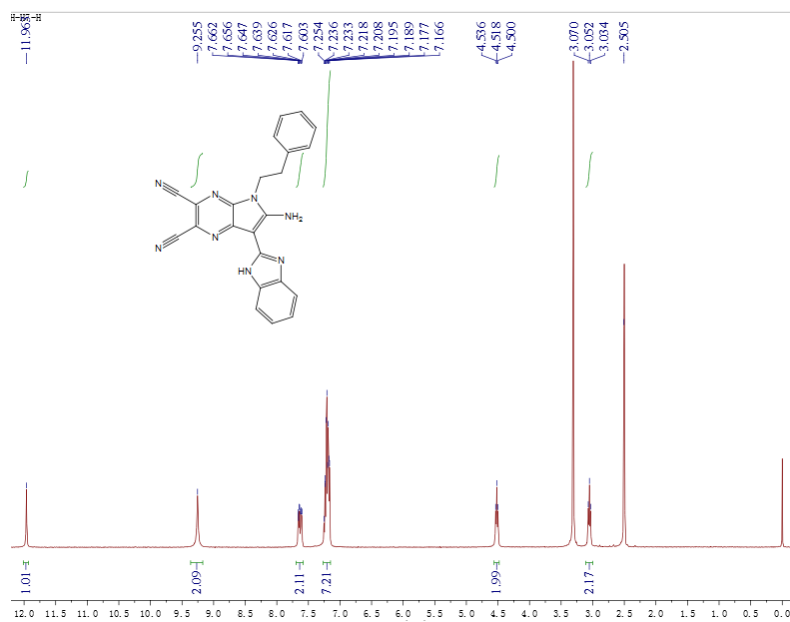

<sup>1</sup>H NMR (400 MHz, DMSO-*d*<sub>6</sub>) of **3h**

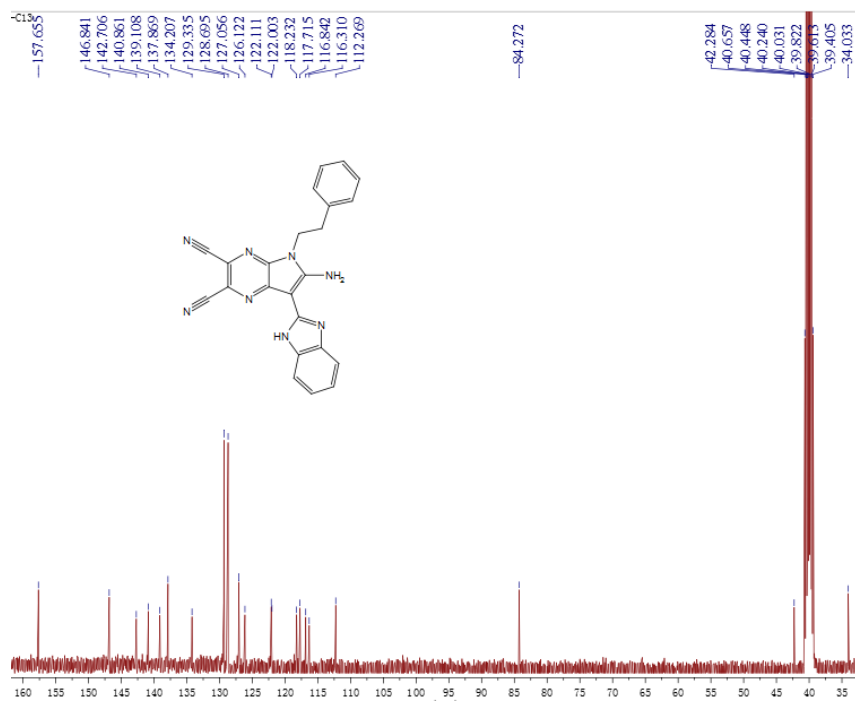

<sup>13</sup>C NMR (100 MHz, DMSO-*d*<sub>6</sub>) of **3h**

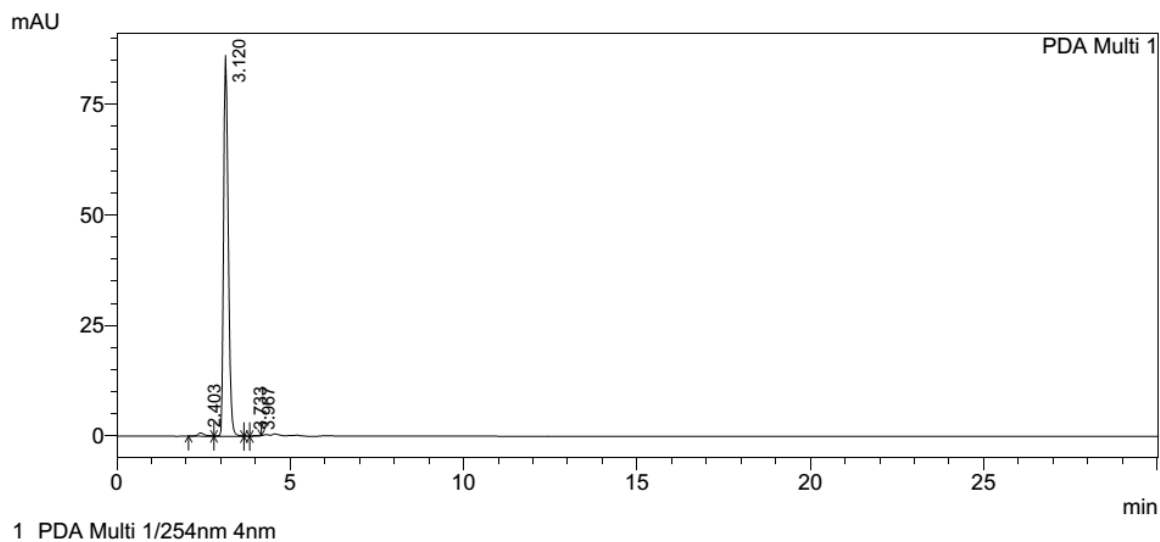

PeakTable

| Peak# | Ret. Time | Area   | Height | Area %  | Height % |
|-------|-----------|--------|--------|---------|----------|
| 1     | 2.403     | 11289  | 766    | 1.369   | 0.877    |
| 2     | 3.120     | 810652 | 86229  | 98.287  | 98.718   |
| 3     | 3.733     | 1146   | 211    | 0.139   | 0.241    |
| 4     | 3.967     | 1693   | 143    | 0.205   | 0.164    |
| Total |           | 824780 | 87349  | 100.000 | 100.000  |

PDA Ch1 254nm 4nm

HPLC spectrum of **3h**

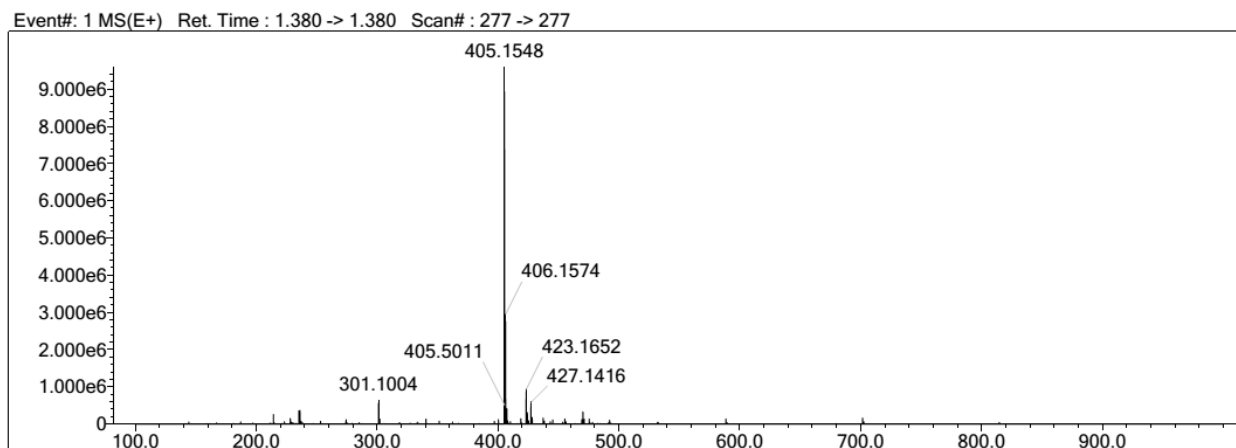

HRMS spectrum of **3h**

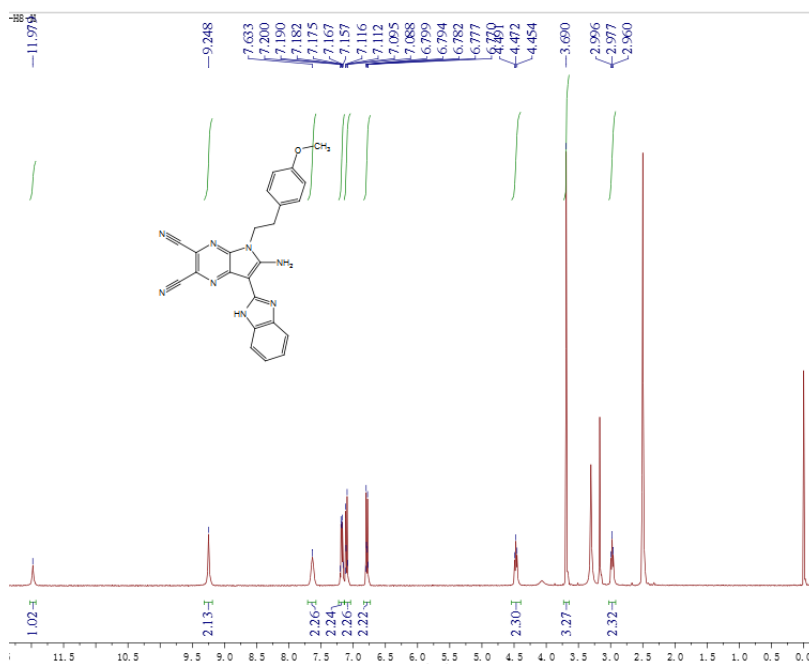

<sup>1</sup>H NMR (400 MHz, DMSO-*d*<sub>6</sub>) of **3i**

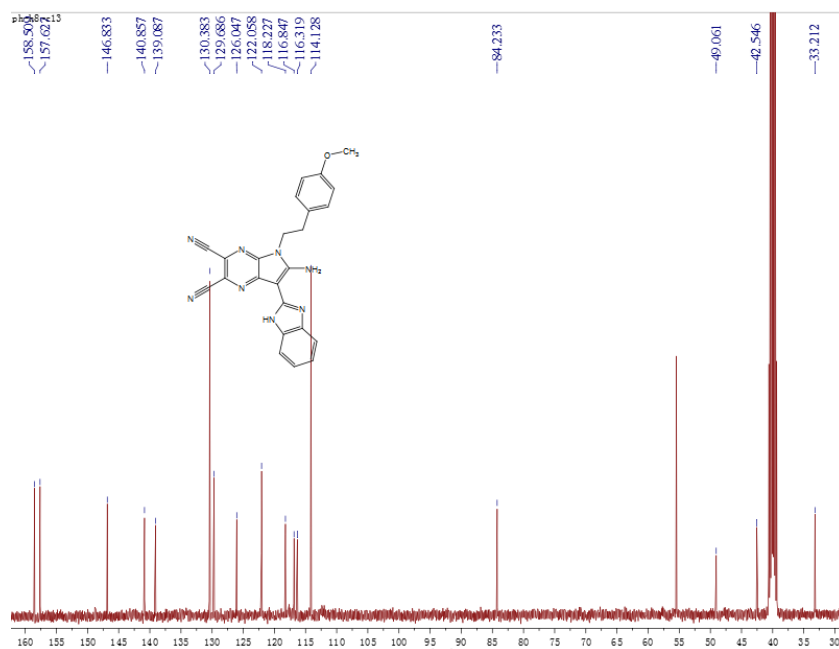

<sup>13</sup>C NMR (100 MHz, DMSO-*d*<sub>6</sub>) of **3i**

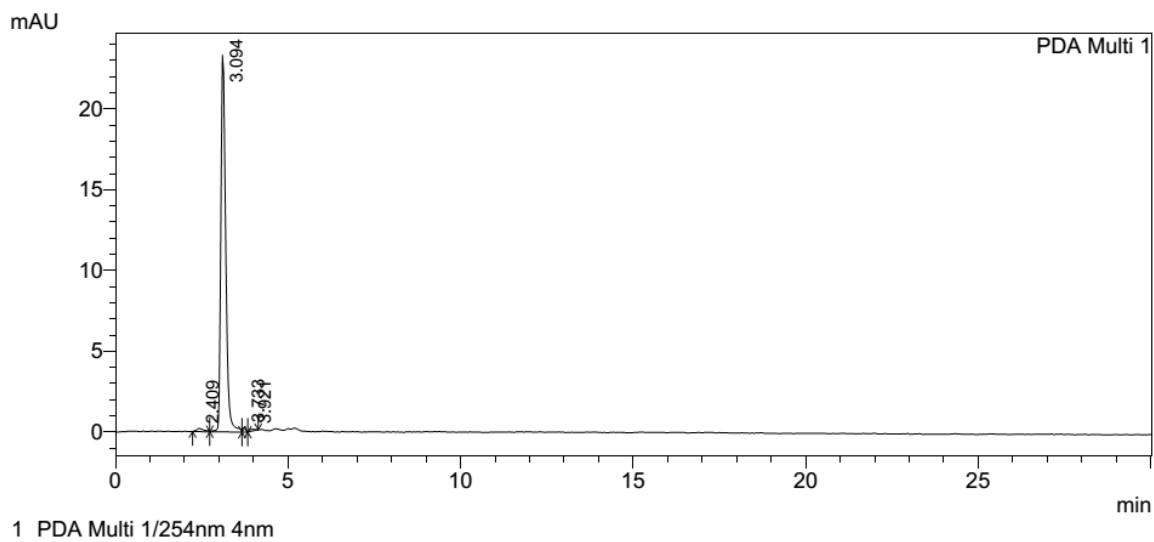

PeakTable

PDA Ch1 254nm 4nm

| Peak# | Ret. Time | Area   | Height | Area %  | Height % |
|-------|-----------|--------|--------|---------|----------|
| 1     | 2.409     | 3074   | 207    | 1.301   | 0.863    |
| 2     | 3.094     | 230303 | 23333  | 97.522  | 97.411   |
| 3     | 3.733     | 1428   | 269    | 0.605   | 1.121    |
| 4     | 3.921     | 1350   | 145    | 0.572   | 0.605    |
| Total |           | 236154 | 23953  | 100.000 | 100.000  |

HPLC spectrum of **3i**

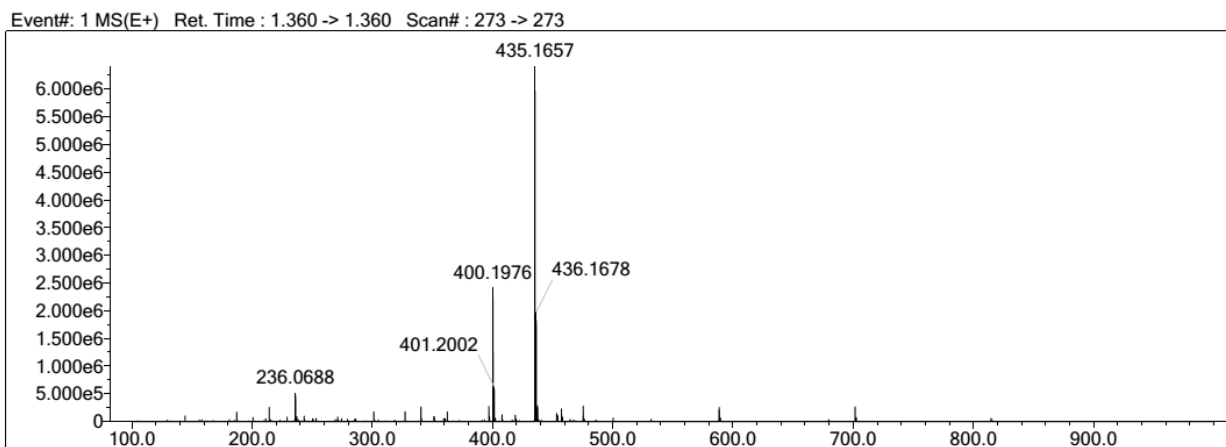

HRMS spectrum of **3i**

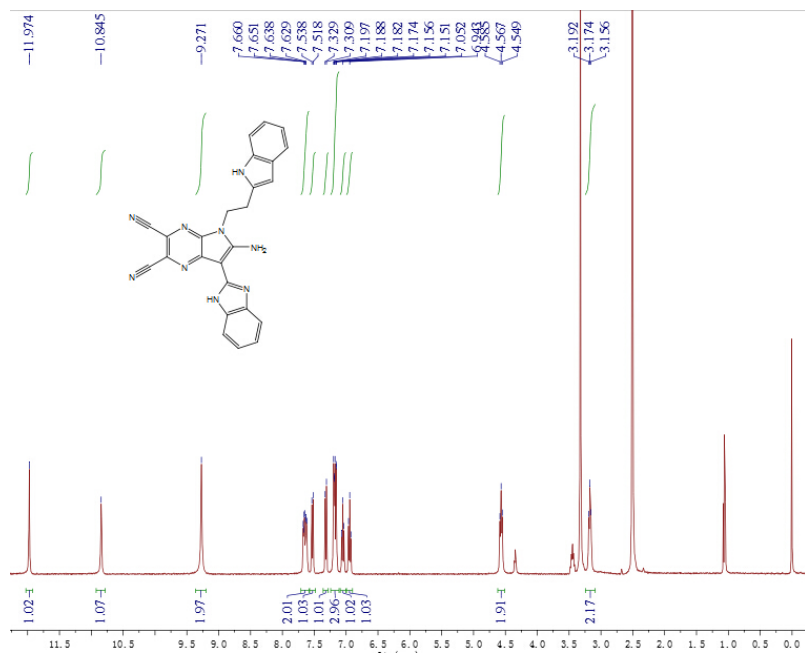

<sup>1</sup>H NMR (400 MHz, DMSO-*d*<sub>6</sub>) of **3j**

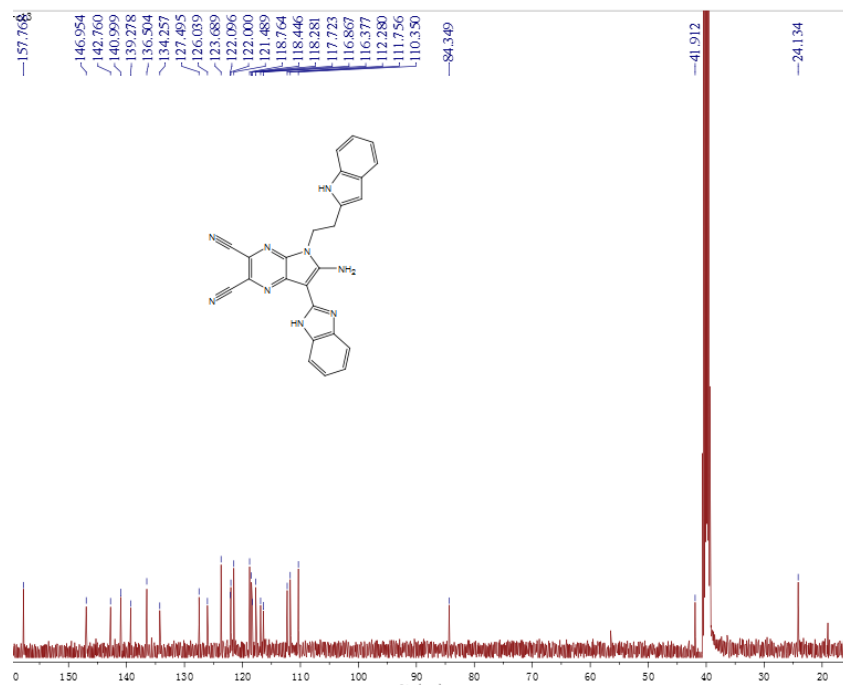

<sup>13</sup>C NMR (100 MHz, DMSO-*d*<sub>6</sub>) of **3j**

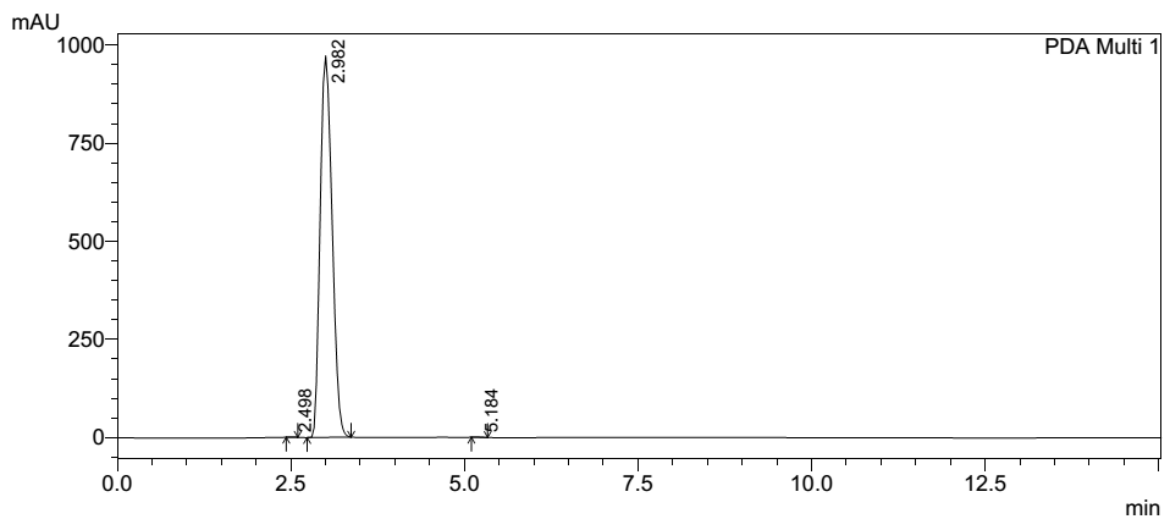

1 PDA Multi 1/254nm 4nm

PeakTable

PDA Ch1 254nm 4nm

| Peak# | Ret. Time | Area     | Height | Area %  | Height % |
|-------|-----------|----------|--------|---------|----------|
| 1     | 2.498     | 2473     | 408    | 0.021   | 0.042    |
| 2     | 2.982     | 11670675 | 972320 | 99.925  | 99.874   |
| 3     | 5.184     | 6254     | 822    | 0.054   | 0.084    |
| Total |           | 11679402 | 973550 | 100.000 | 100.000  |

HPLC spectrum of **3j**

Event#: 1 MS(E+) Ret. Time : 1.310 -> 1.310 Scan#: 263 -> 263

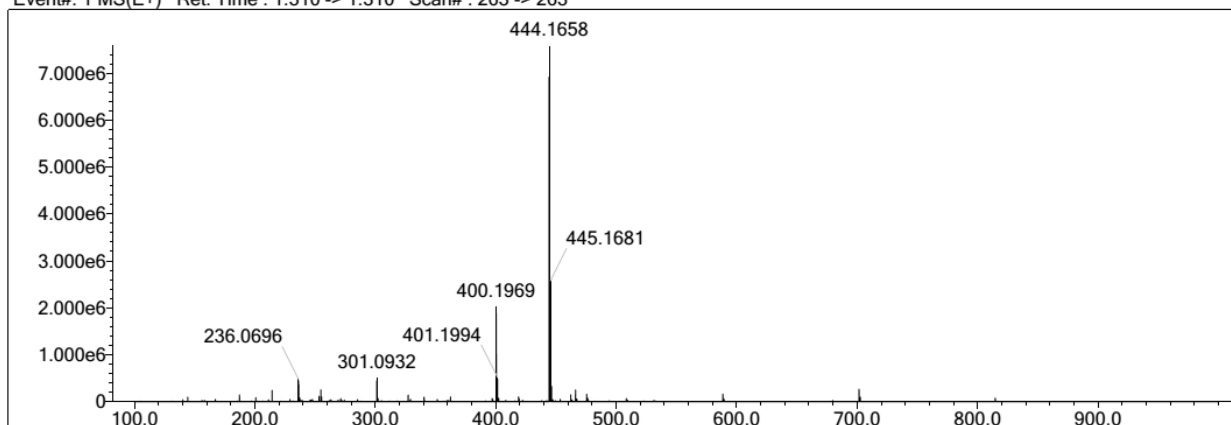

HRMS spectrum of **3j**



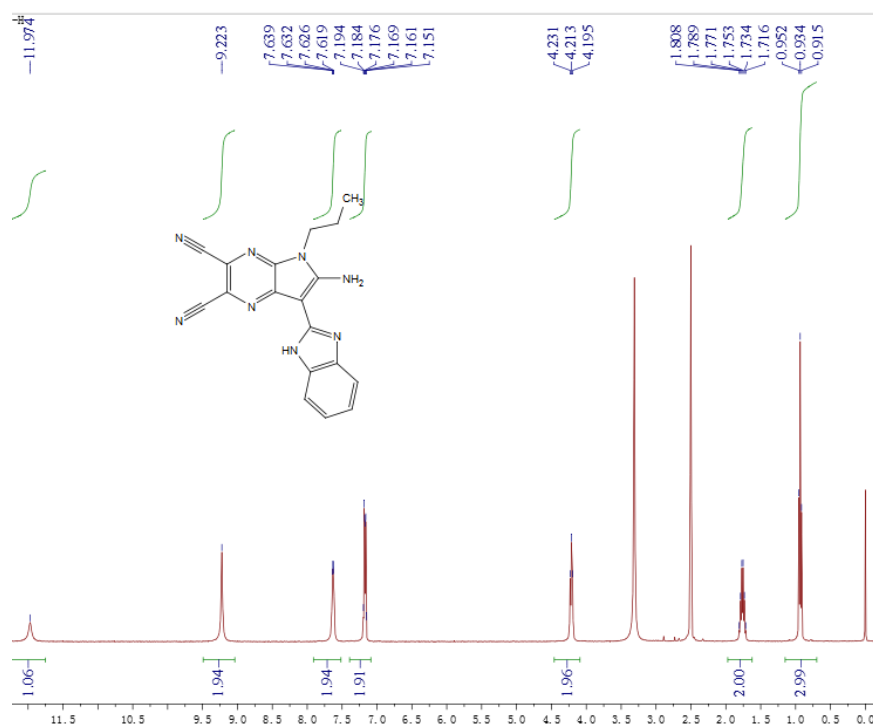

<sup>1</sup>H NMR (400 MHz, DMSO-*d*<sub>6</sub>) of **3k**

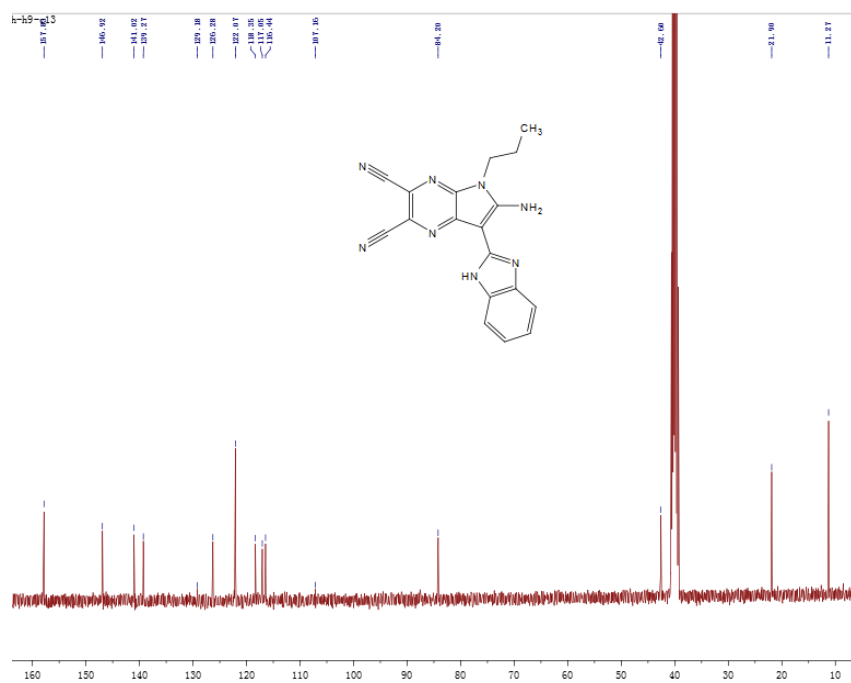

<sup>13</sup>C NMR (100 MHz, DMSO-*d*<sub>6</sub>) of **3k**

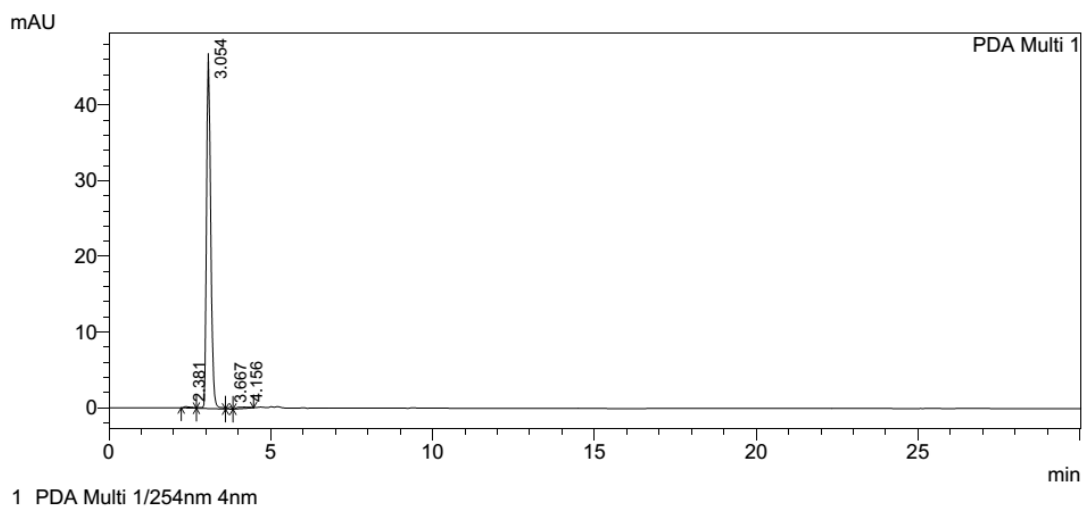

PeakTable

| PDA Ch1 254nm 4nm |           |        |        |         |          |
|-------------------|-----------|--------|--------|---------|----------|
| Peak#             | Ret. Time | Area   | Height | Area %  | Height % |
| 1                 | 2.381     | 3094   | 168    | 0.707   | 0.354    |
| 2                 | 3.054     | 426908 | 46944  | 97.607  | 98.853   |
| 3                 | 3.667     | 2292   | 186    | 0.524   | 0.392    |
| 4                 | 4.156     | 5079   | 190    | 1.161   | 0.401    |
| Total             |           | 437373 | 47489  | 100.000 | 100.000  |

HPLC spectrum of **3k**

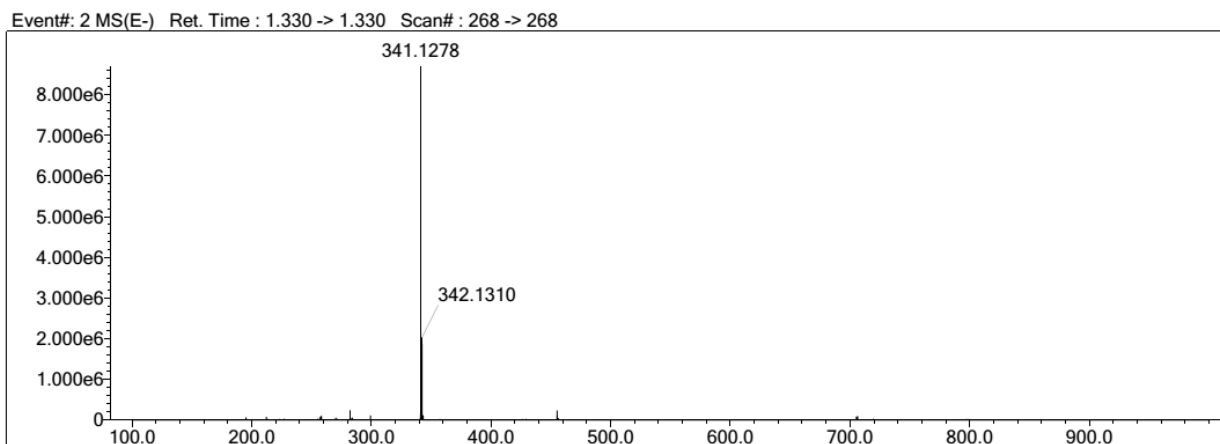

HRMS spectrum of **3k**

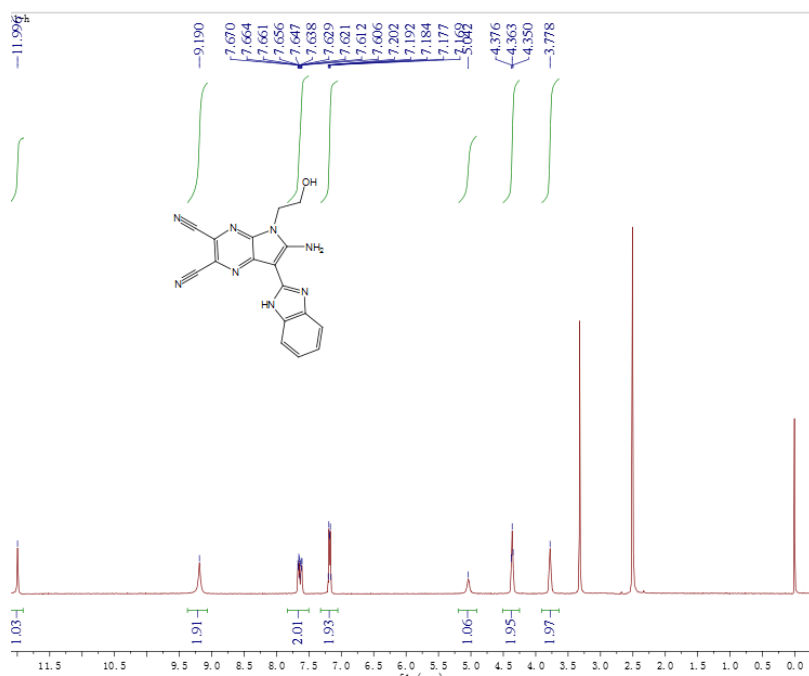

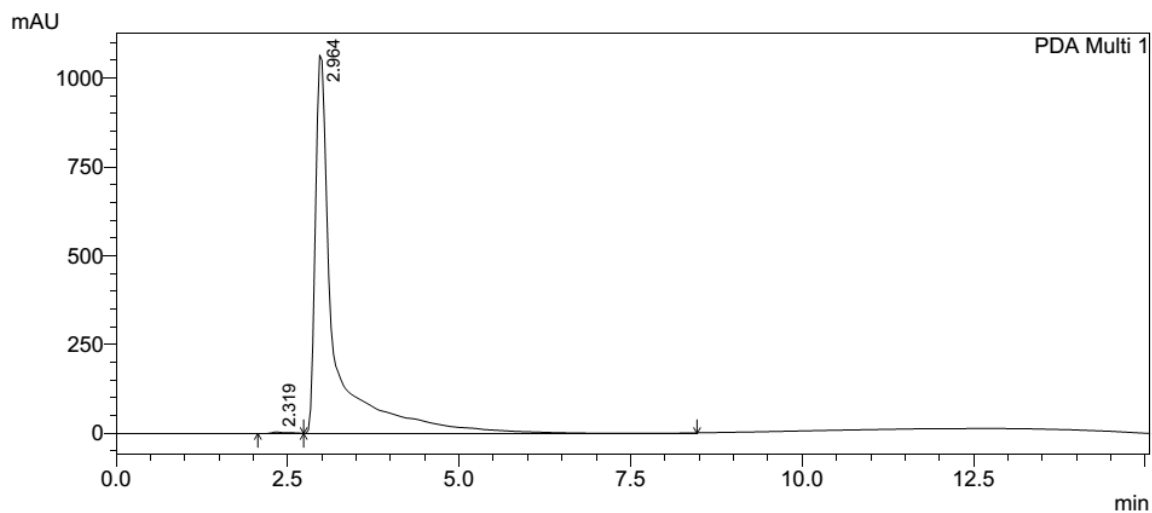

1 PDA Multi 1/254nm 4nm

PeakTable

PDA Ch1 254nm 4nm

| Peak# | Ret. Time | Area     | Height  | Area %  | Height % |
|-------|-----------|----------|---------|---------|----------|
| 1     | 2.319     | 75854    | 4656    | 0.368   | 0.435    |
| 2     | 2.964     | 20510840 | 1065559 | 99.632  | 99.565   |
| Total |           | 20586693 | 1070215 | 100.000 | 100.000  |

HPLC spectrum of **3I**

Event#: 1 MS(E+) Ret. Time : 1.250 -> 1.250 Scan#: 251 -> 251

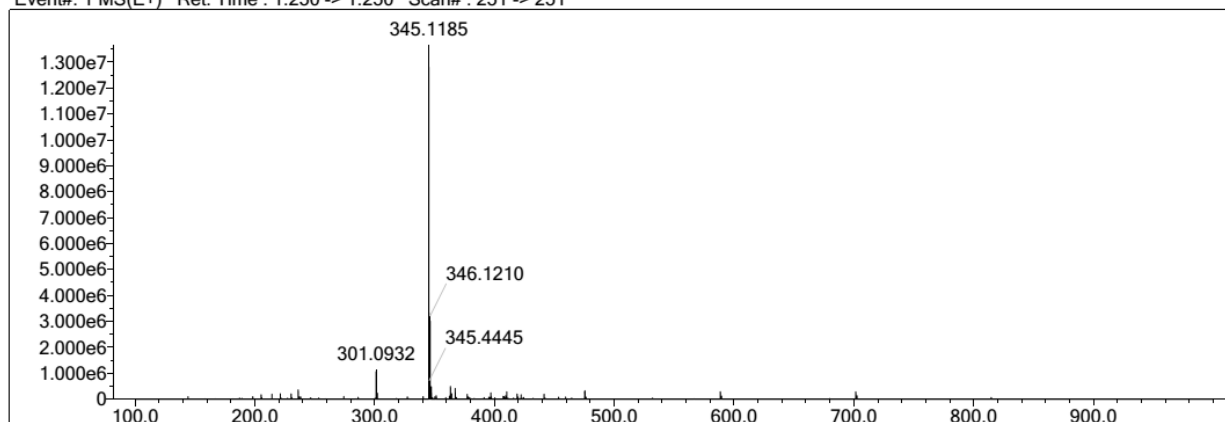

HRMS spectrum of **3I**

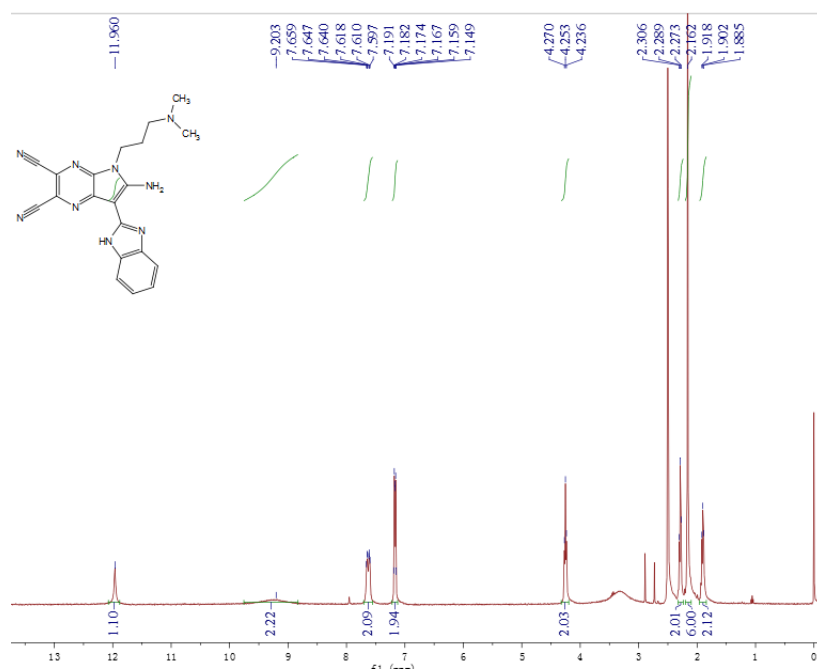

<sup>1</sup>H NMR (400 MHz, DMSO-*d*<sub>6</sub>) of **3m**

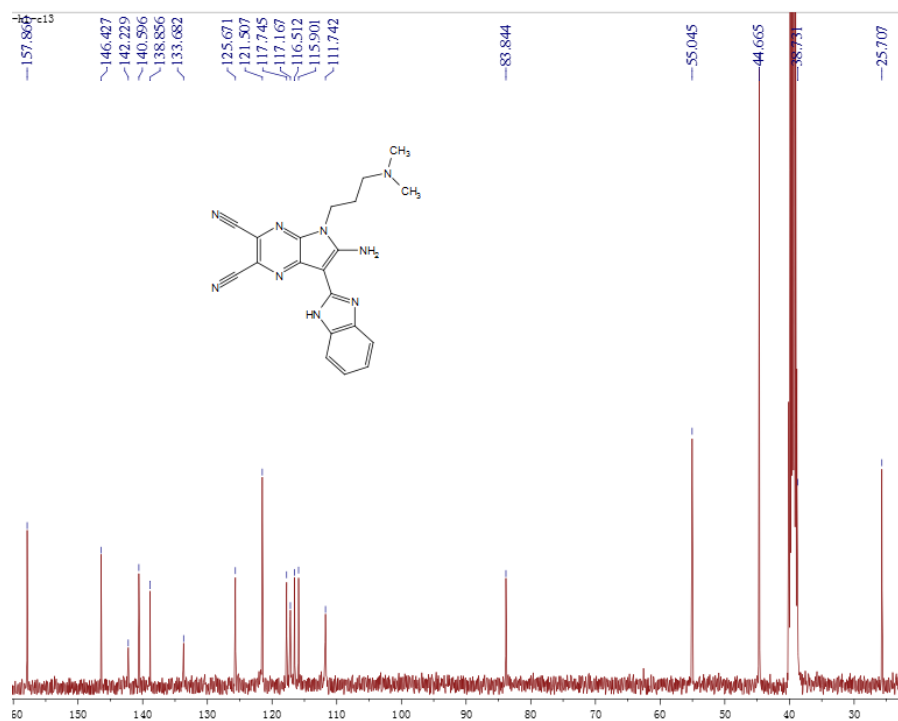

<sup>13</sup>C NMR (100 MHz, DMSO-*d*<sub>6</sub>) of **3m**

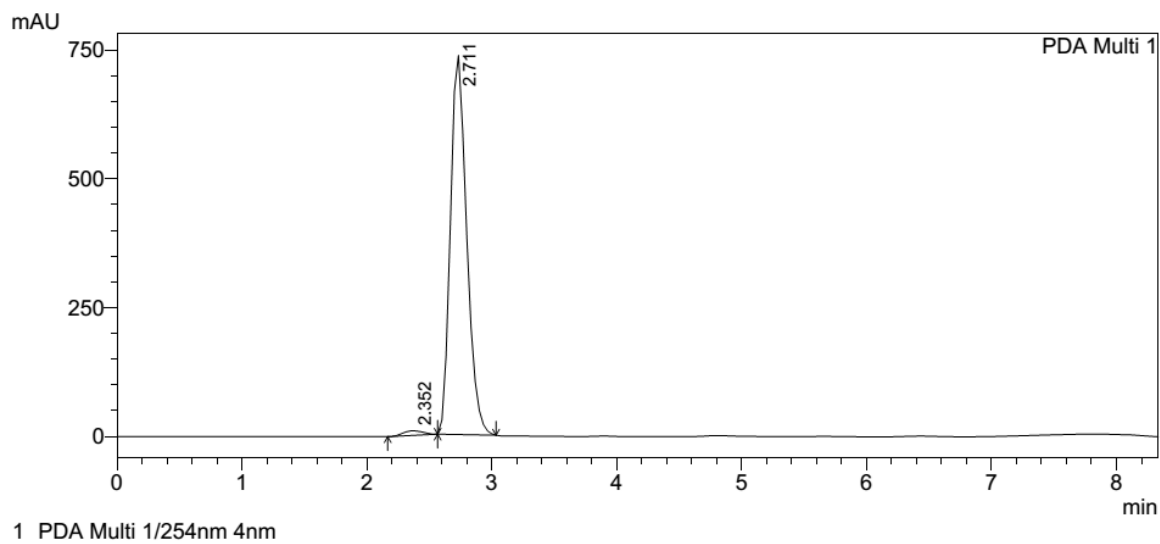

PeakTable

| Peak# | Ret. Time | Area    | Height | Area %  | Height % |
|-------|-----------|---------|--------|---------|----------|
| 1     | 2.352     | 103081  | 9181   | 1.519   | 1.232    |
| 2     | 2.711     | 6684290 | 736173 | 98.481  | 98.768   |
| Total |           | 6787372 | 745354 | 100.000 | 100.000  |

HPLC spectrum of **3m**

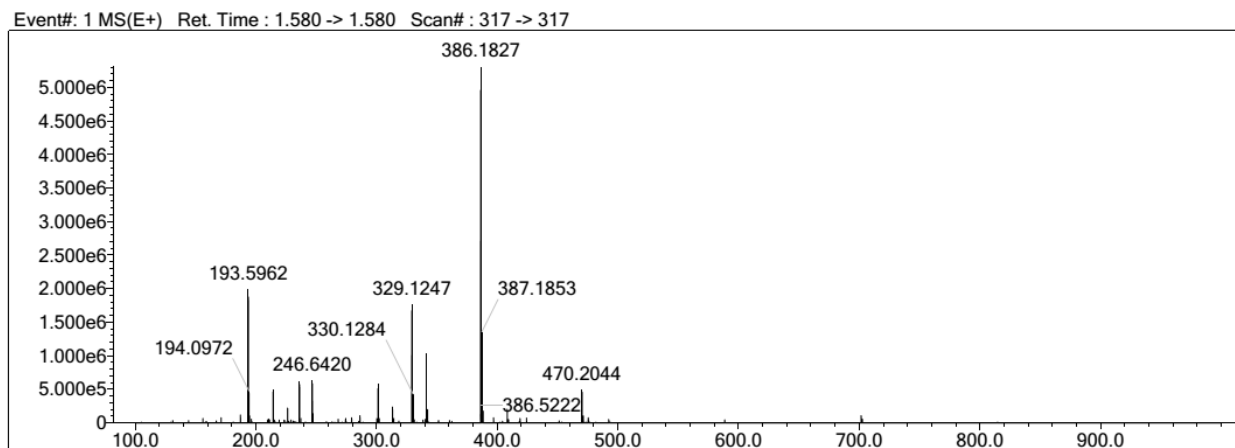

HRMS spectrum of **3m**

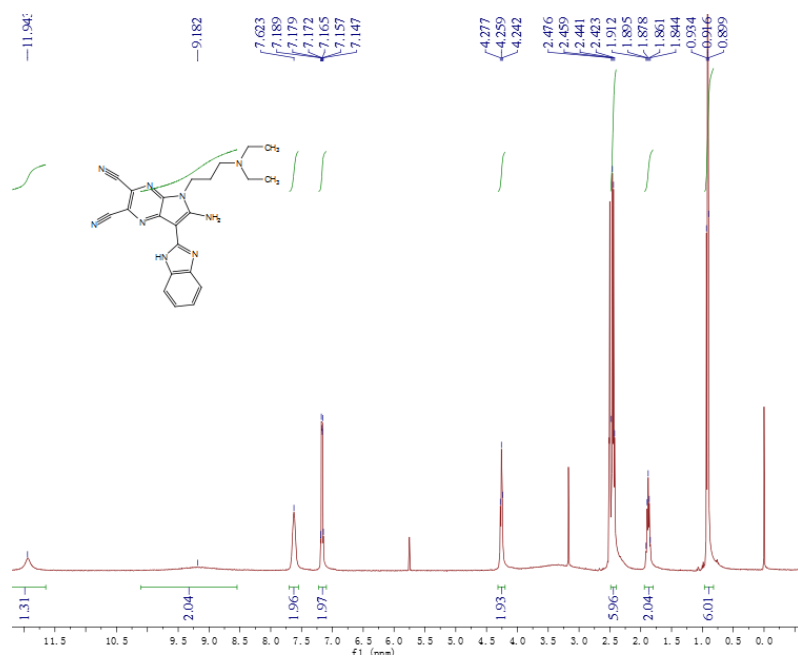

<sup>1</sup>H NMR (400 MHz, DMSO-*d*<sub>6</sub>) of **3n**

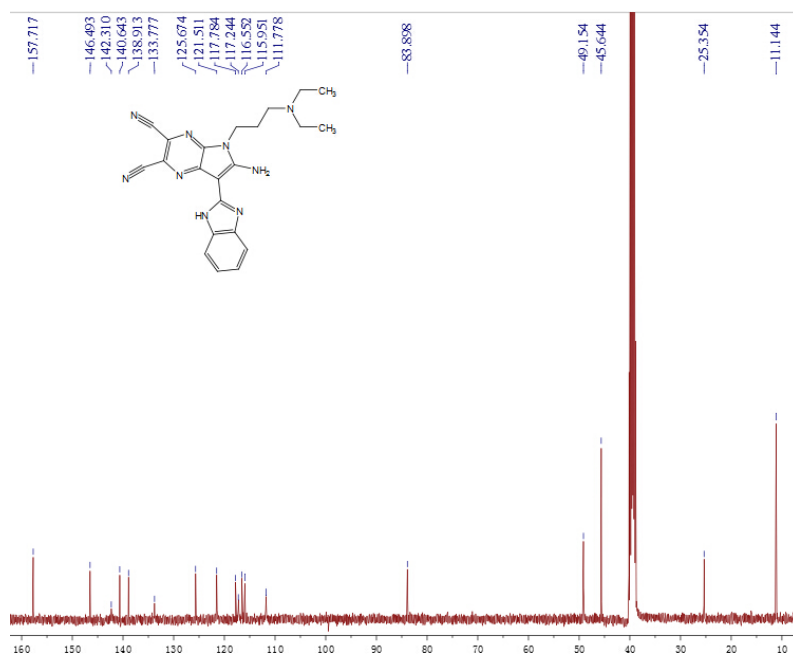

<sup>13</sup>C NMR (100 MHz, DMSO-*d*<sub>6</sub>) of **3n**

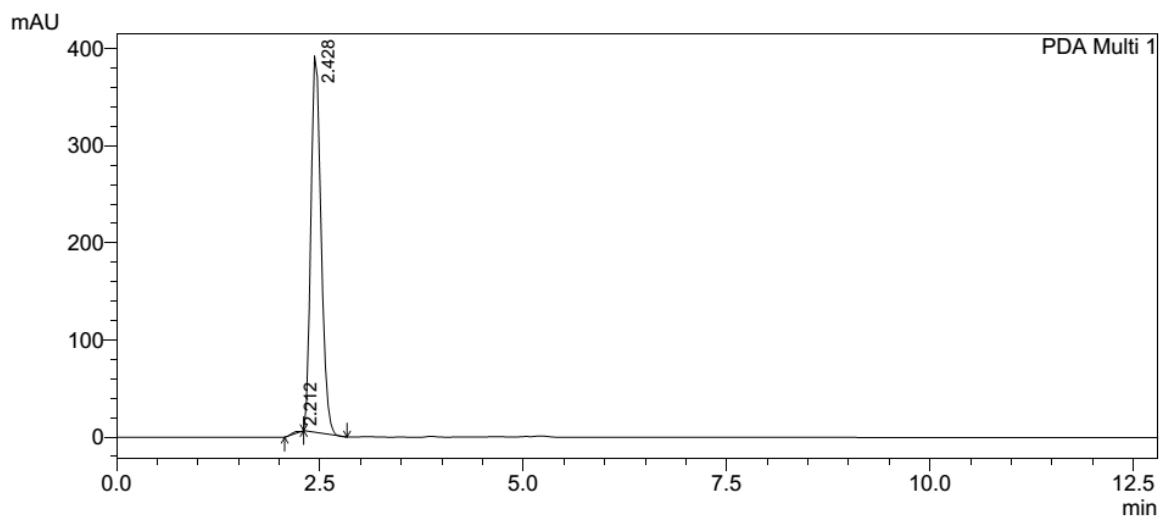

1 PDA Multi 1/254nm 4nm

PeakTable

PDA Ch1 254nm 4nm

| Peak# | Ret. Time | Area    | Height | Area %  | Height % |
|-------|-----------|---------|--------|---------|----------|
| 1     | 2.212     | 17235   | 1812   | 0.507   | 0.465    |
| 2     | 2.428     | 3381663 | 387697 | 99.493  | 99.535   |
| Total |           | 3398898 | 389509 | 100.000 | 100.000  |

HPLC spectrum of **3n**

Event#: 1 MS(E+) Ret. Time : 1.510 -> 1.510 Scan#: 303 -> 303

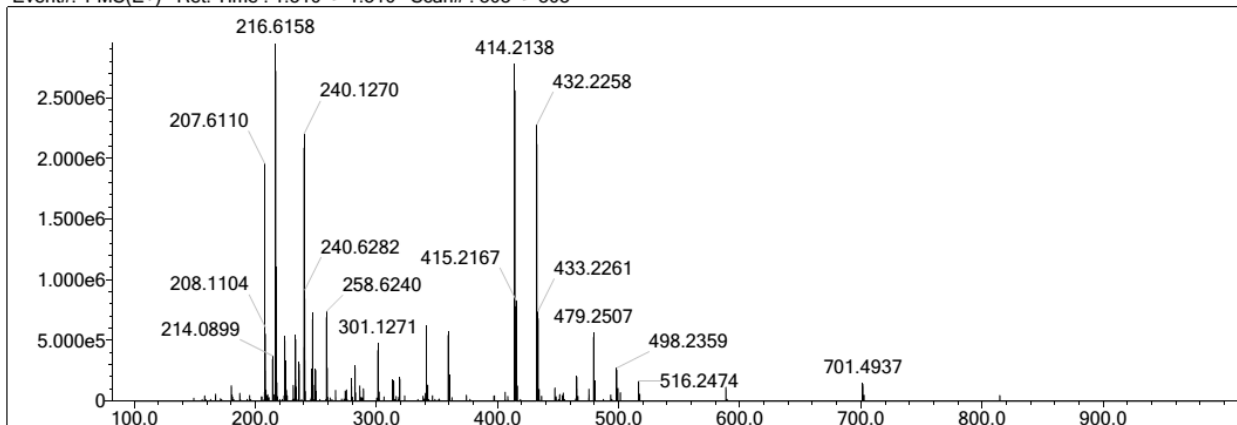

HRMS spectrum of **3n**



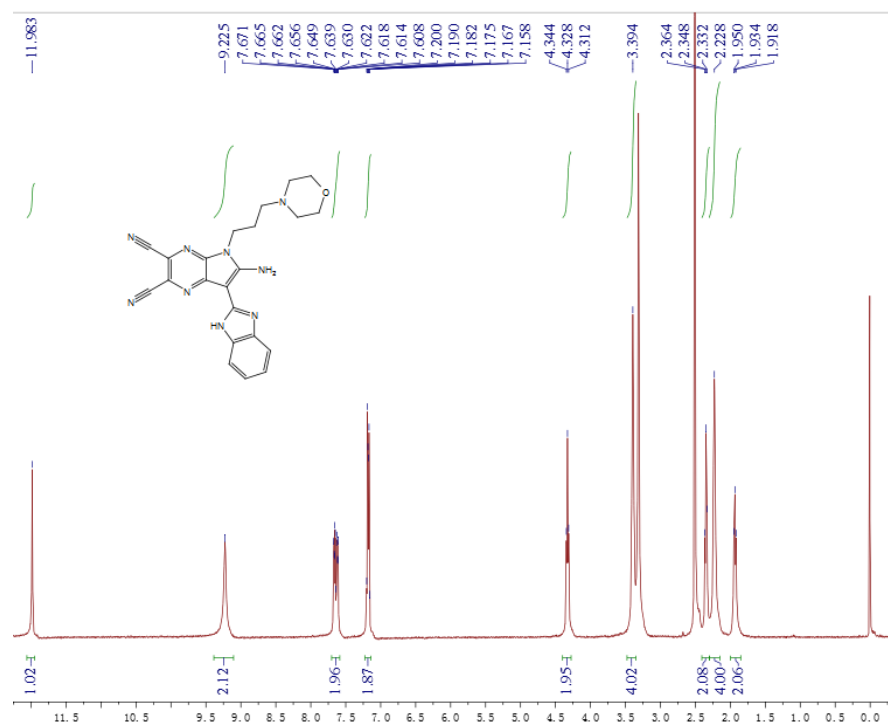

<sup>1</sup>H NMR (400 MHz, DMSO-*d*<sub>6</sub>) of **3o**

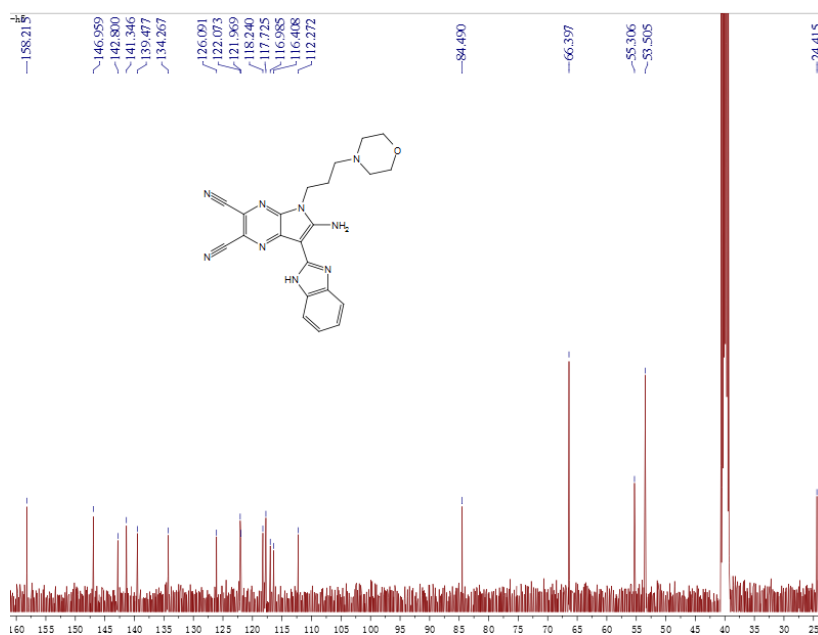

<sup>13</sup>C NMR (100 MHz, DMSO-*d*<sub>6</sub>) of **3o**

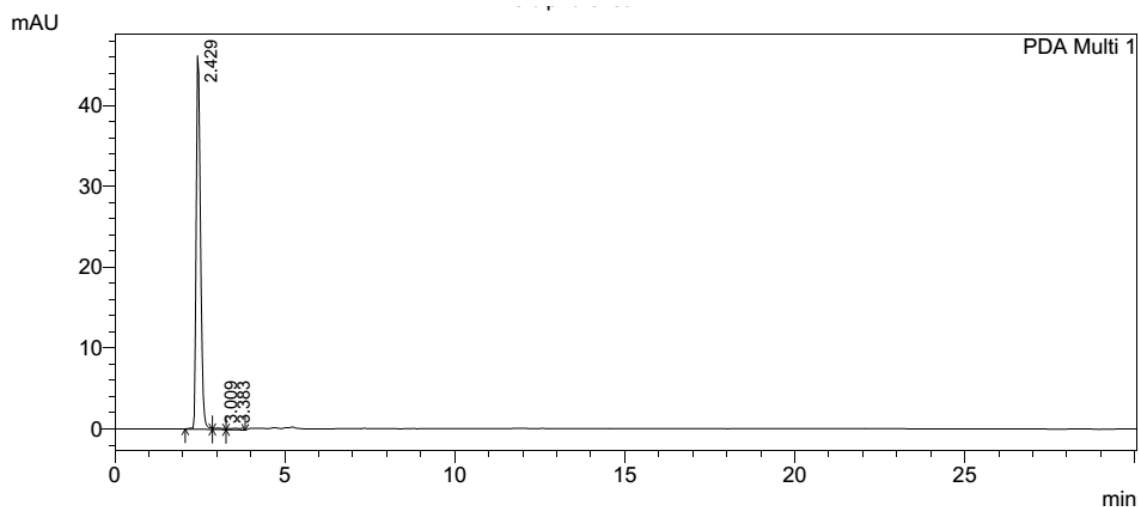

PeakTable

| PDA Ch1 254nm 4nm |           |        |        |         |          |
|-------------------|-----------|--------|--------|---------|----------|
| Peak#             | Ret. Time | Area   | Height | Area %  | Height % |
| 1                 | 2.429     | 408159 | 46214  | 97.805  | 99.191   |
| 2                 | 3.009     | 3630   | 193    | 0.870   | 0.414    |
| 3                 | 3.383     | 5533   | 184    | 1.326   | 0.395    |
| Total             |           | 417321 | 46591  | 100.000 | 100.000  |

HPLC spectrum of **3o**

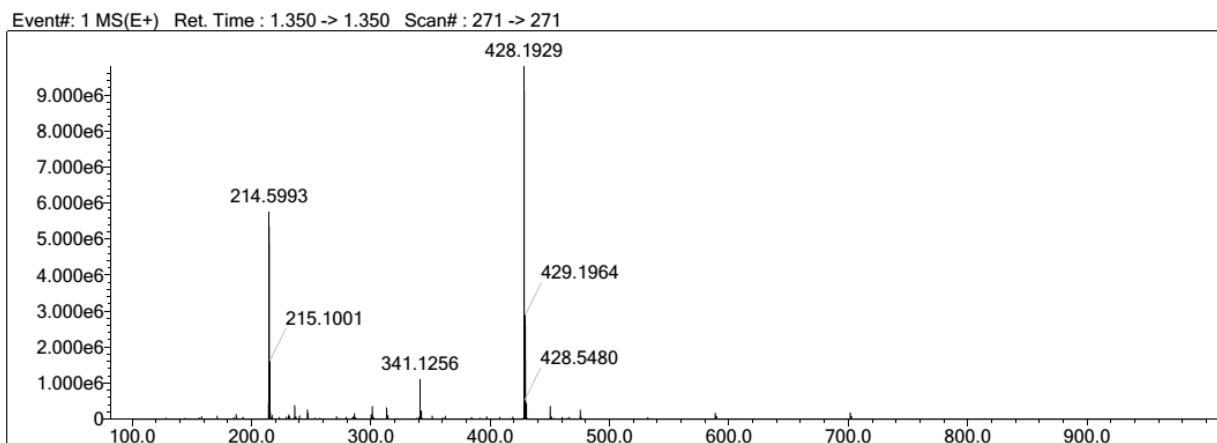

HRMS spectrum of **3o**

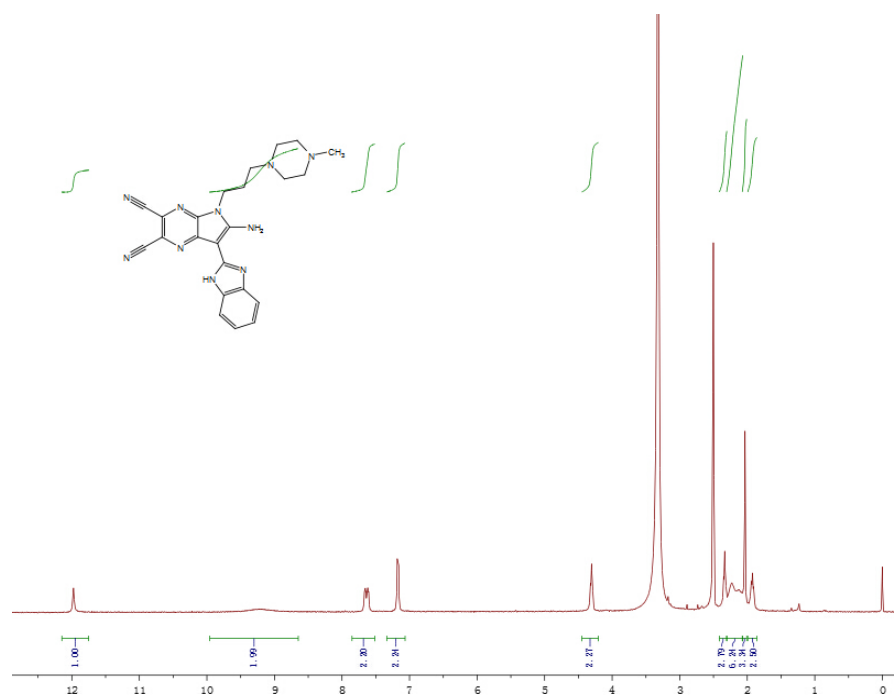

<sup>1</sup>H NMR (400 MHz, DMSO-*d*<sub>6</sub>) of **3p**

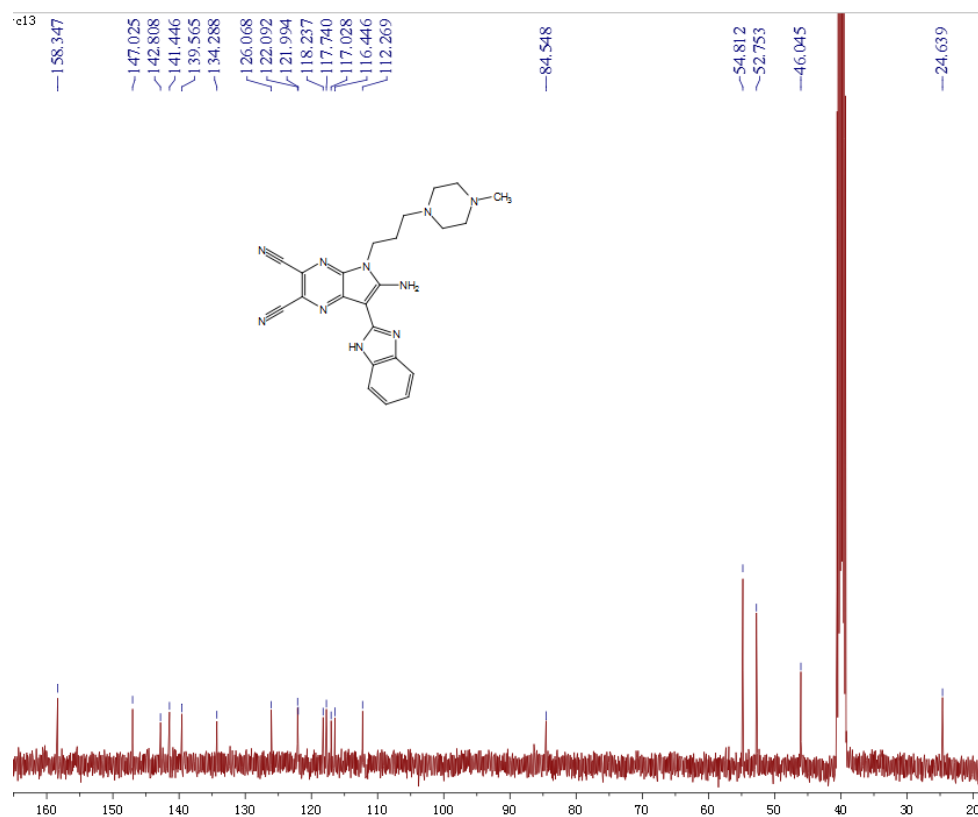

<sup>13</sup>C NMR (100 MHz, DMSO-*d*<sub>6</sub>) of **3p**

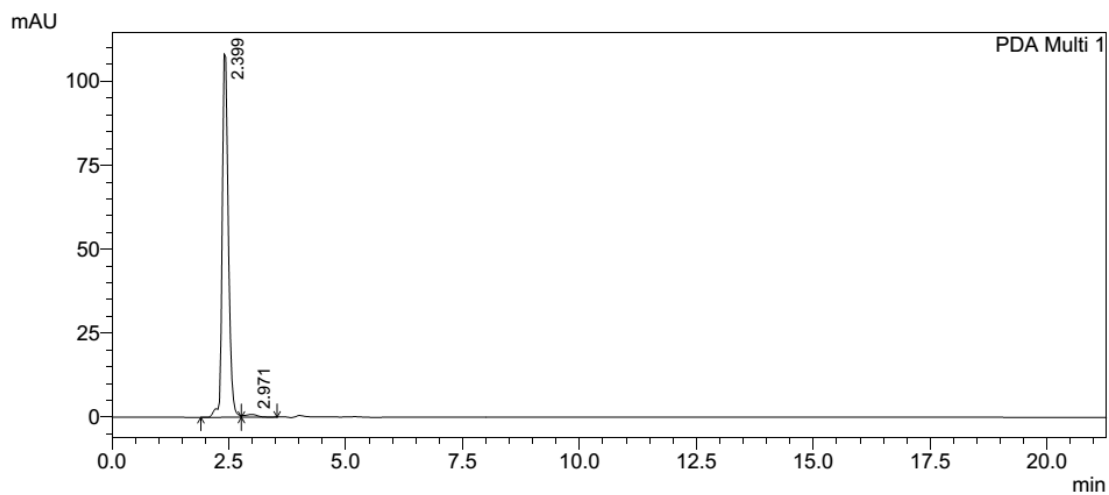

1 PDA Multi 1/254nm 4nm

PeakTable

PDA Ch1 254nm 4nm

| Peak# | Ret. Time | Area    | Height | Area %  | Height % |
|-------|-----------|---------|--------|---------|----------|
| 1     | 2.399     | 996891  | 108355 | 98.425  | 99.239   |
| 2     | 2.971     | 15950   | 831    | 1.575   | 0.761    |
| Total |           | 1012841 | 109186 | 100.000 | 100.000  |

HPLC spectrum of **3p**

Event#: 1 MS(E+) Ret. Time : 1.520 -> 1.520 Scan#: 305 -> 305

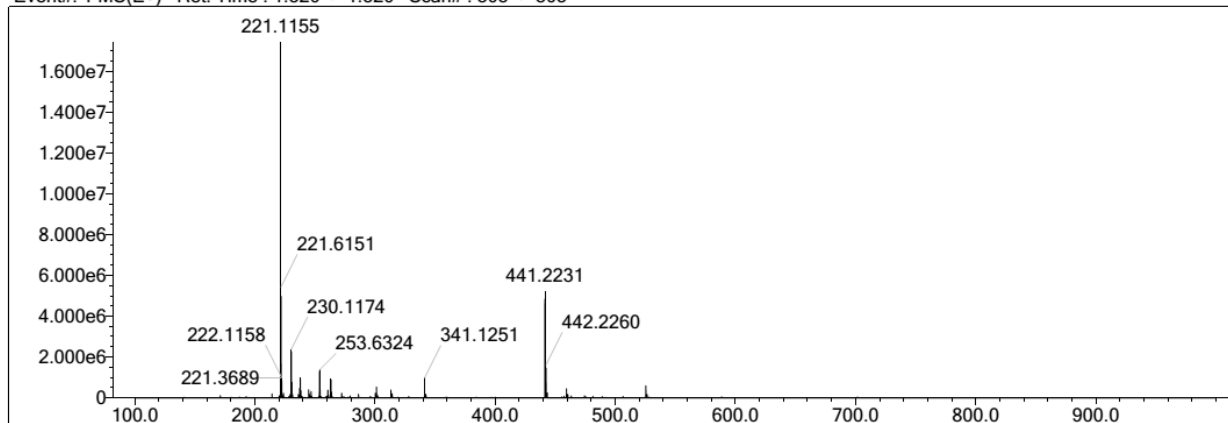

HRMS spectrum of **3p**

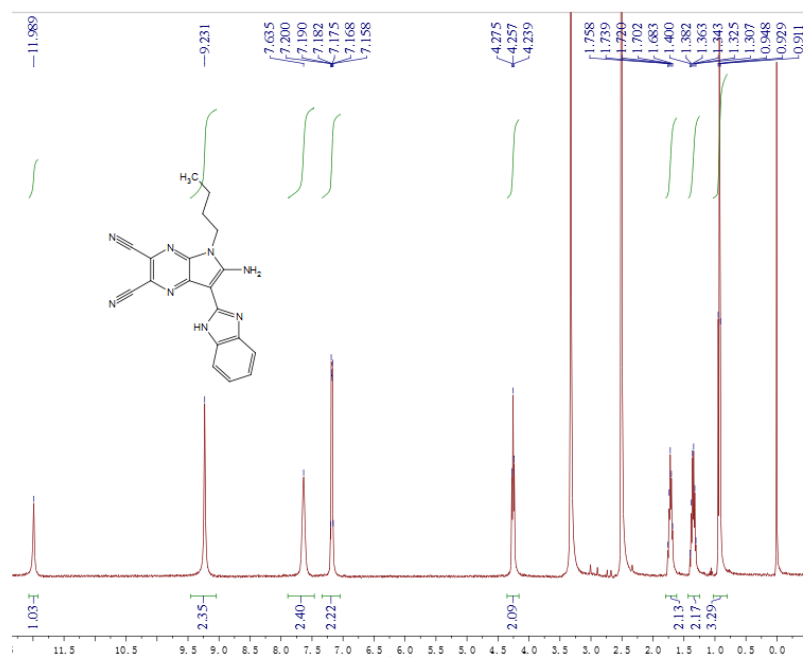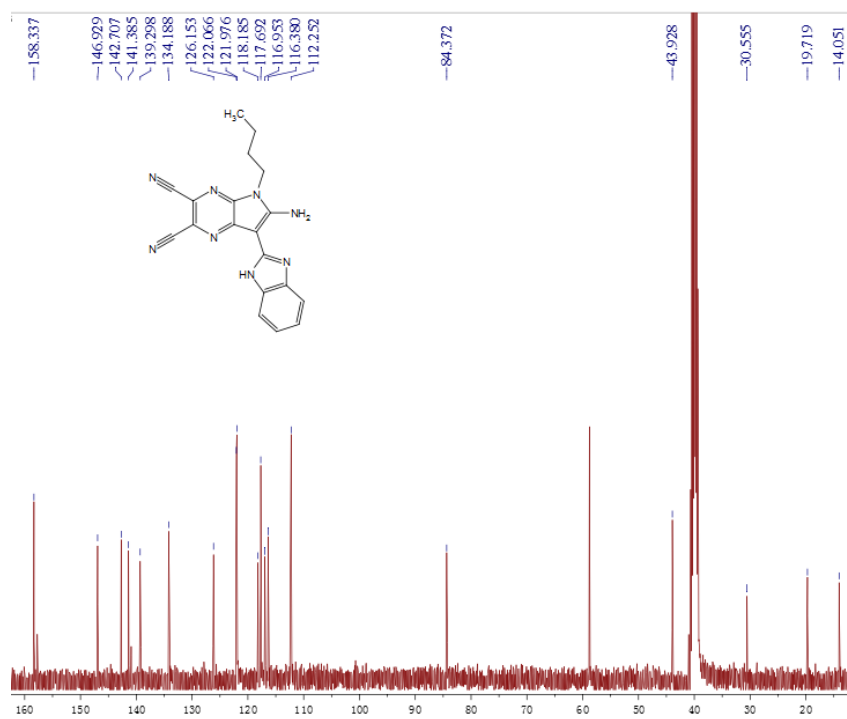

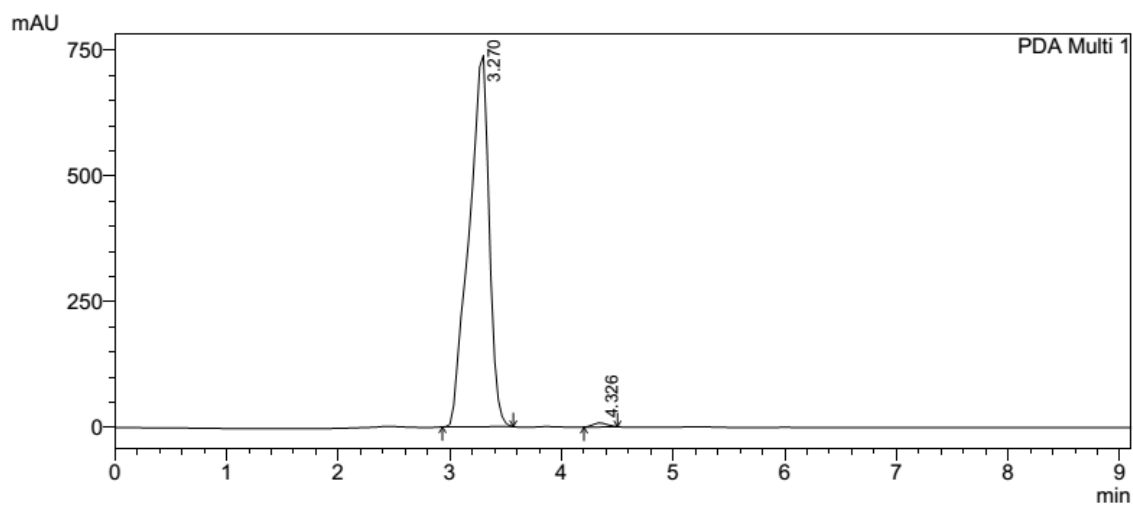

1 PDA Multi 1/254nm 4nm

PeakTable

| Peak# | Ret. Time | Area    | Height | Area %  | Height % |
|-------|-----------|---------|--------|---------|----------|
| 1     | 3.270     | 9255149 | 738770 | 99.234  | 98.948   |
| 2     | 4.326     | 71470   | 7855   | 0.766   | 1.052    |
| Total |           | 9326619 | 746626 | 100.000 | 100.000  |

HPLC spectrum of **3q**

Event#: 2 MS(E-) Ret. Time : 1.420 -> 1.420 Scan# : 286 -> 286

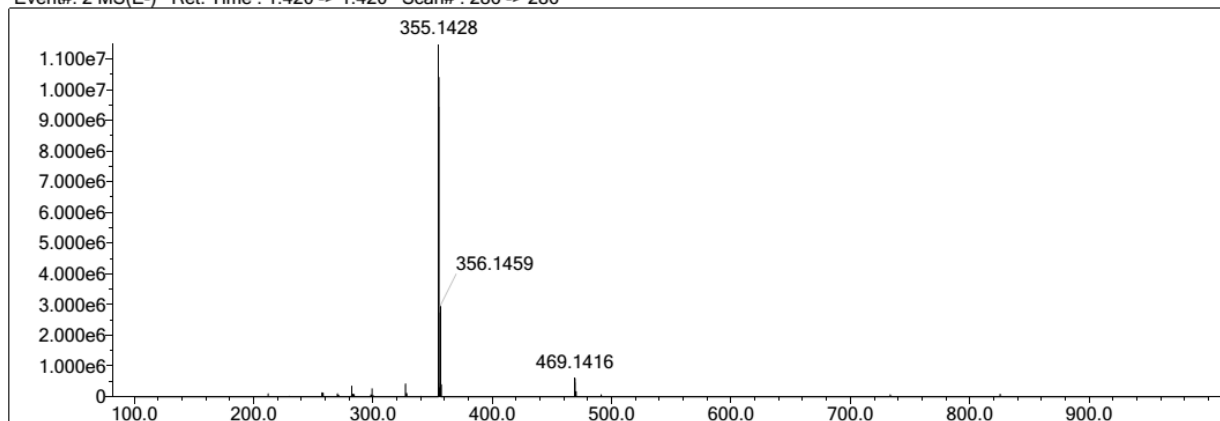

HRMS spectrum of **3q**

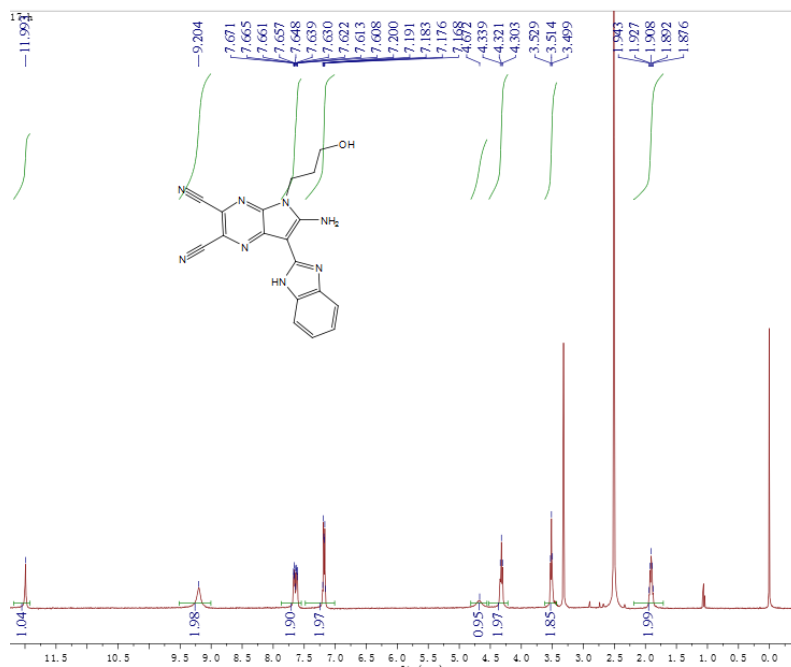

<sup>1</sup>H NMR (400 MHz, DMSO-*d*<sub>6</sub>) of **3r**

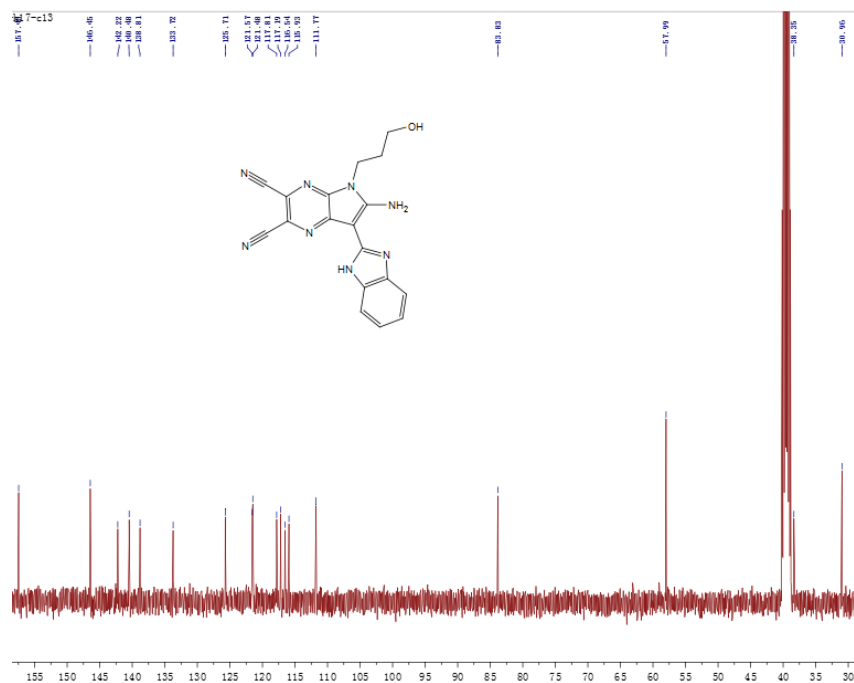

<sup>13</sup>C NMR (100 MHz, DMSO-*d*<sub>6</sub>) of **3r**

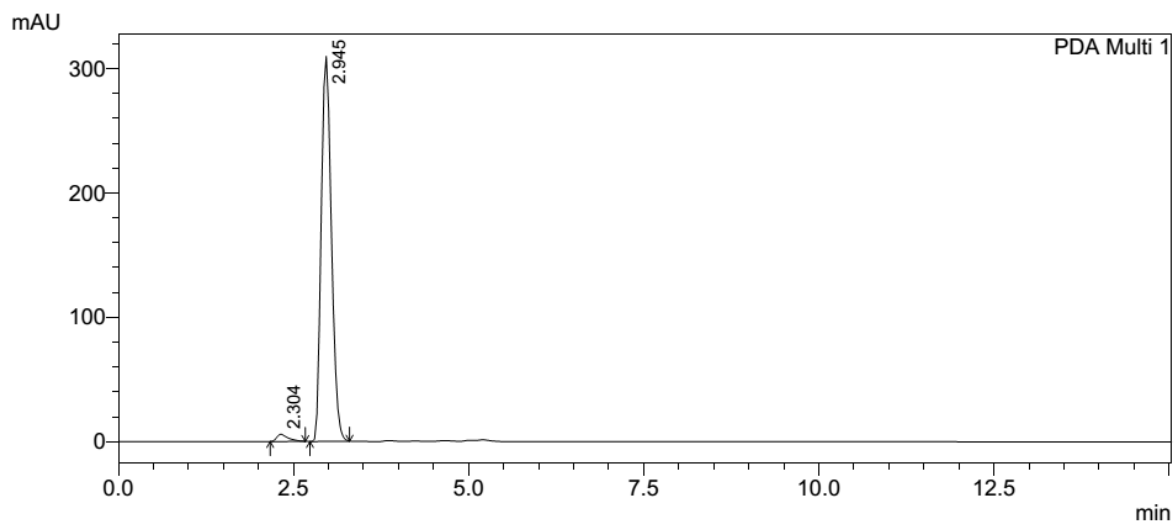

1 PDA Multi 1/254nm 4nm

PeakTable

PDA Ch1 254nm 4nm

| Peak# | Ret. Time | Area    | Height | Area %  | Height % |
|-------|-----------|---------|--------|---------|----------|
| 1     | 2.304     | 67001   | 5820   | 2.084   | 1.843    |
| 2     | 2.945     | 3147952 | 309961 | 97.916  | 98.157   |
| Total |           | 3214953 | 315781 | 100.000 | 100.000  |

HPLC spectrum of **3r**

Event#: 2 MS(E-) Ret. Time : 1.350 -> 1.350 Scan#: 272 -> 272

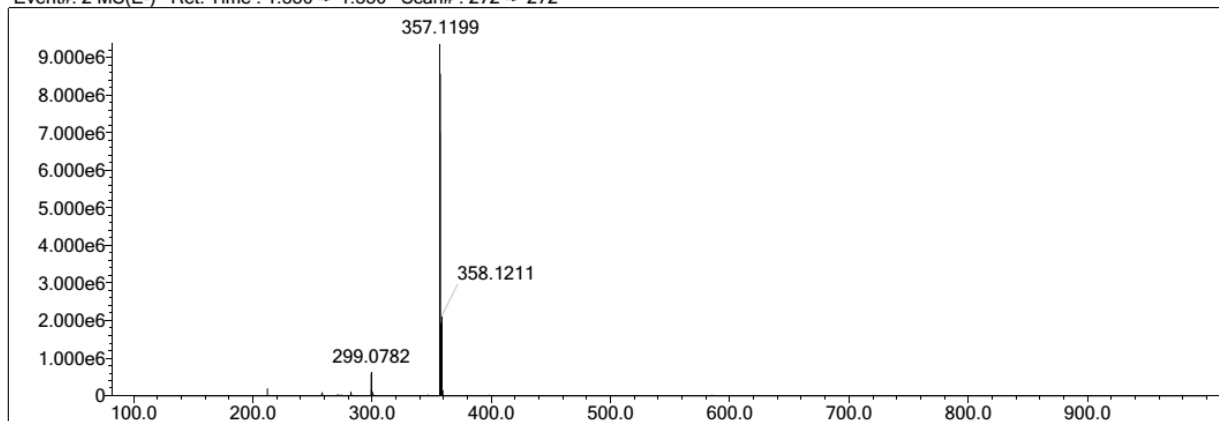

HRMS spectrum of **3r**



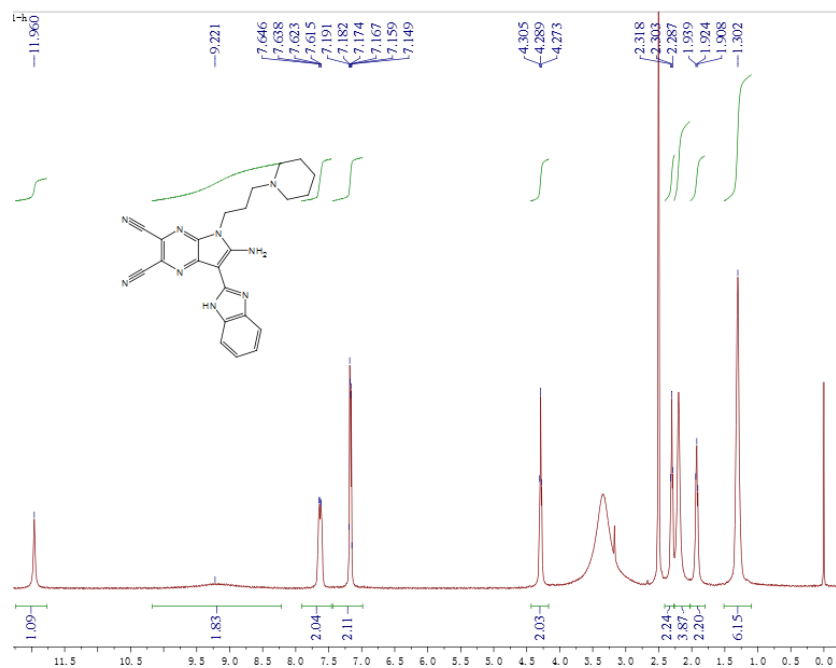

<sup>1</sup>H NMR (400 MHz, DMSO-*d*<sub>6</sub>) of **3s**

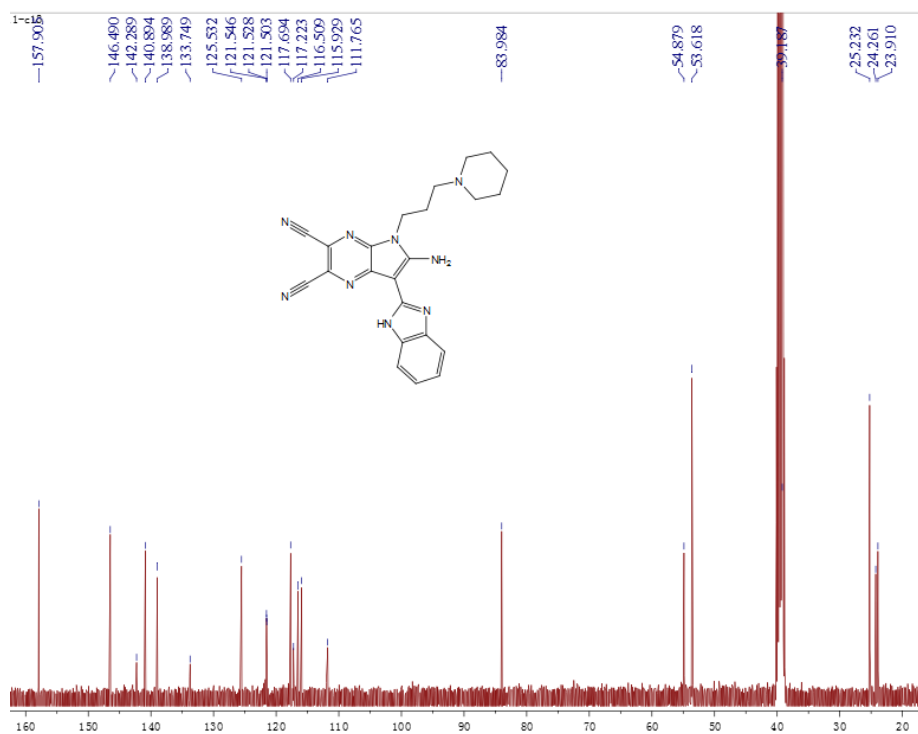

<sup>13</sup>C NMR (100 MHz, DMSO-*d*<sub>6</sub>) of **3s**

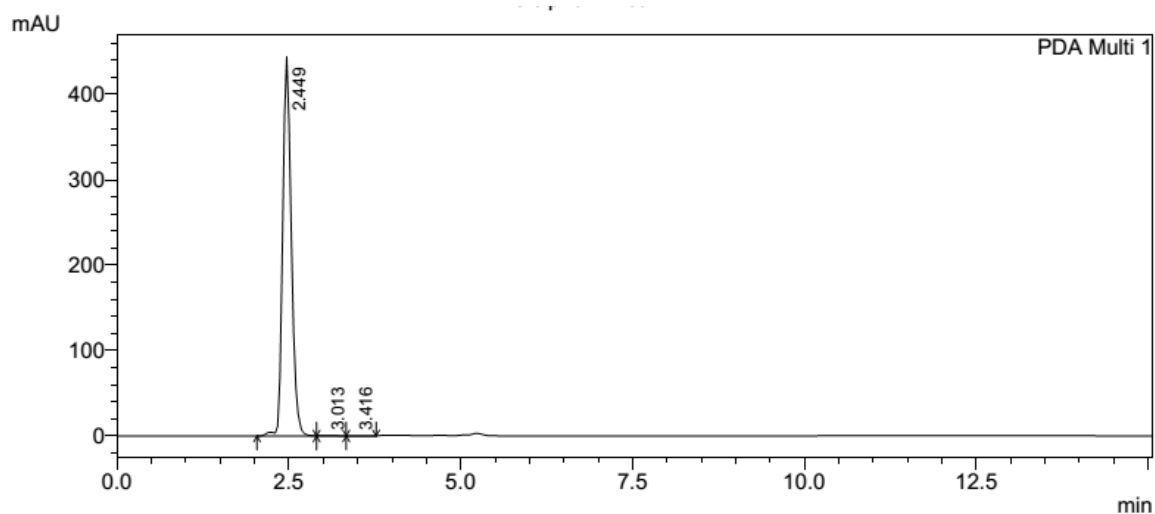

1 PDA Multi 1/254nm 4nm

PeakTable

| Peak# | Ret. Time | Area    | Height | Area %  | Height % |
|-------|-----------|---------|--------|---------|----------|
| 1     | 2.449     | 3890856 | 444573 | 99.647  | 99.786   |
| 2     | 3.013     | 9613    | 630    | 0.246   | 0.141    |
| 3     | 3.416     | 4158    | 322    | 0.106   | 0.072    |
| Total |           | 3904627 | 445525 | 100.000 | 100.000  |

HPLC spectrum of **3s**

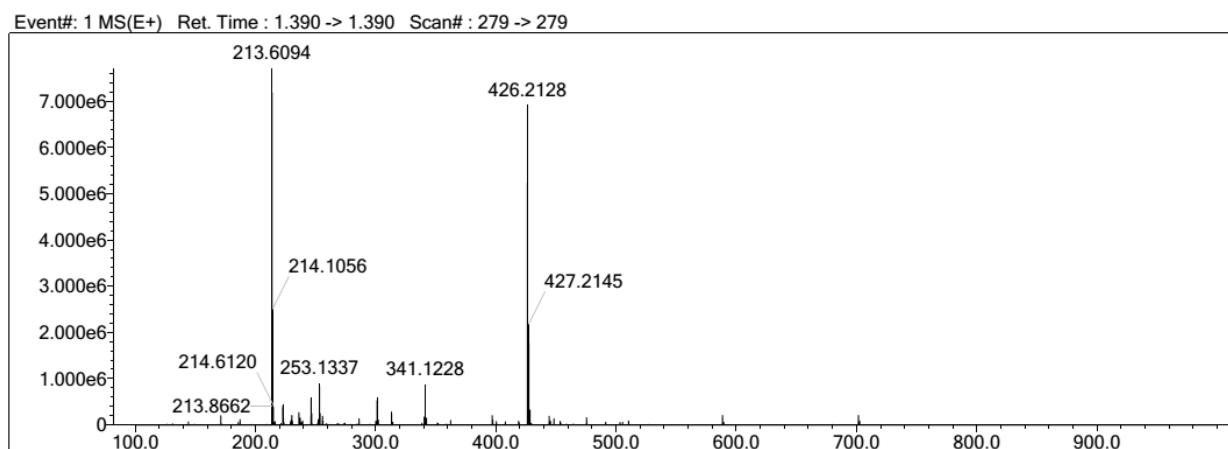

HRMS spectrum of **3s**

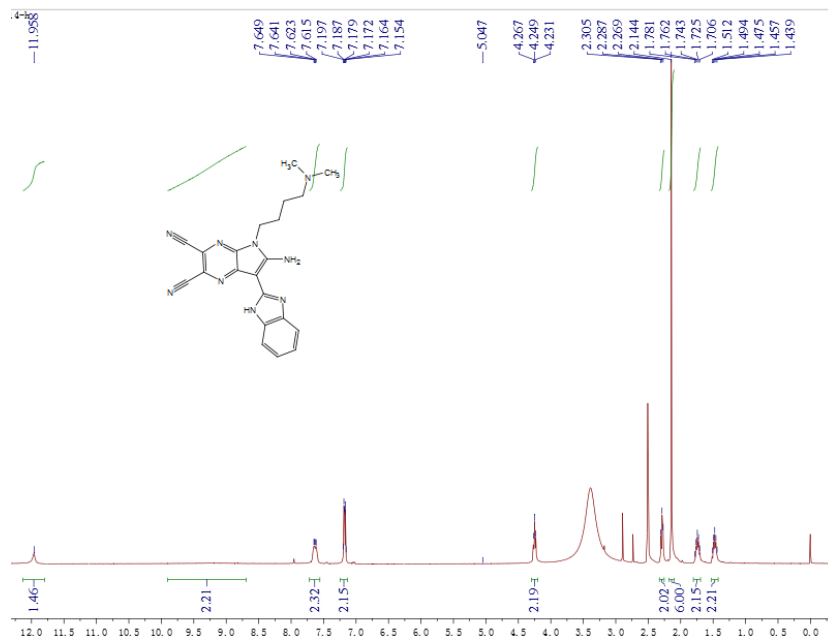

<sup>1</sup>H NMR (400 MHz, DMSO-*d*<sub>6</sub>) of **3t**

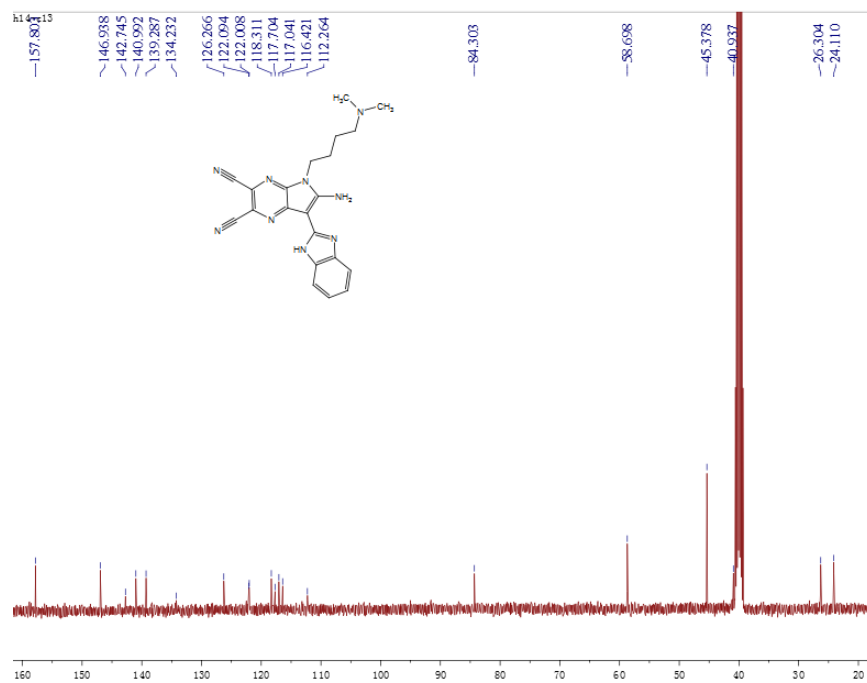

<sup>13</sup>C NMR (100 MHz, DMSO-*d*<sub>6</sub>) of **3t**

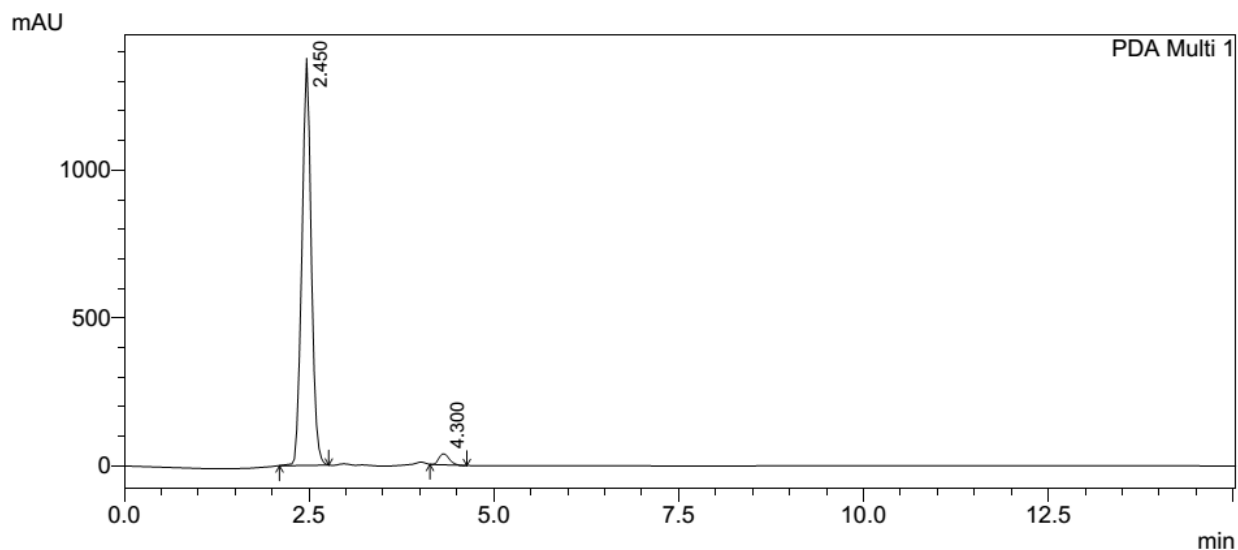

1 PDA Multi 1/254nm 4nm

PeakTable

PDA Ch1 254nm 4nm

| Peak# | Ret. Time | Area     | Height  | Area %  | Height % |
|-------|-----------|----------|---------|---------|----------|
| 1     | 2.450     | 12089458 | 1376805 | 97.099  | 97.391   |
| 2     | 4.300     | 361205   | 36882   | 2.901   | 2.609    |
| Total |           | 12450663 | 1413687 | 100.000 | 100.000  |

HPLC spectrum of **3t**

Event#: 2 MS(E-) Ret. Time : 1.450 -> 1.450 Scan#: 292 -> 292

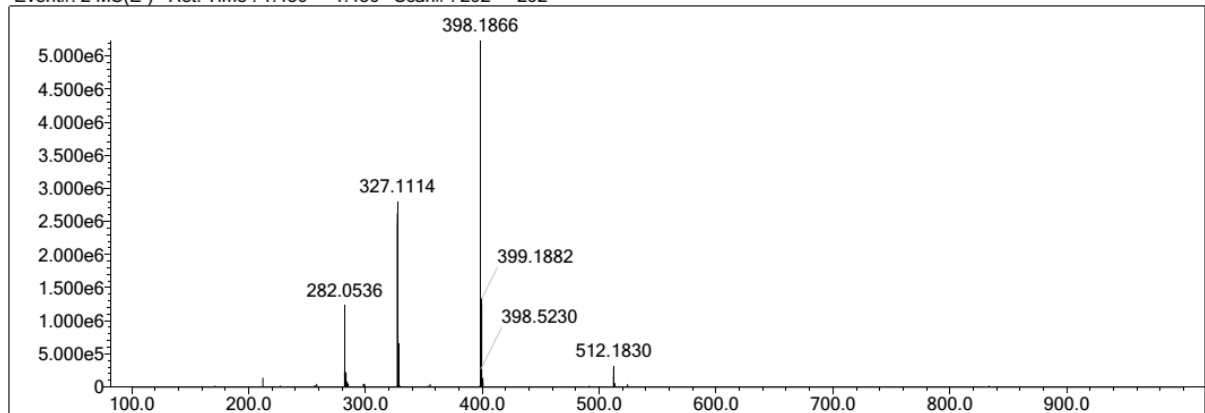

HRMS spectrum of **3t**

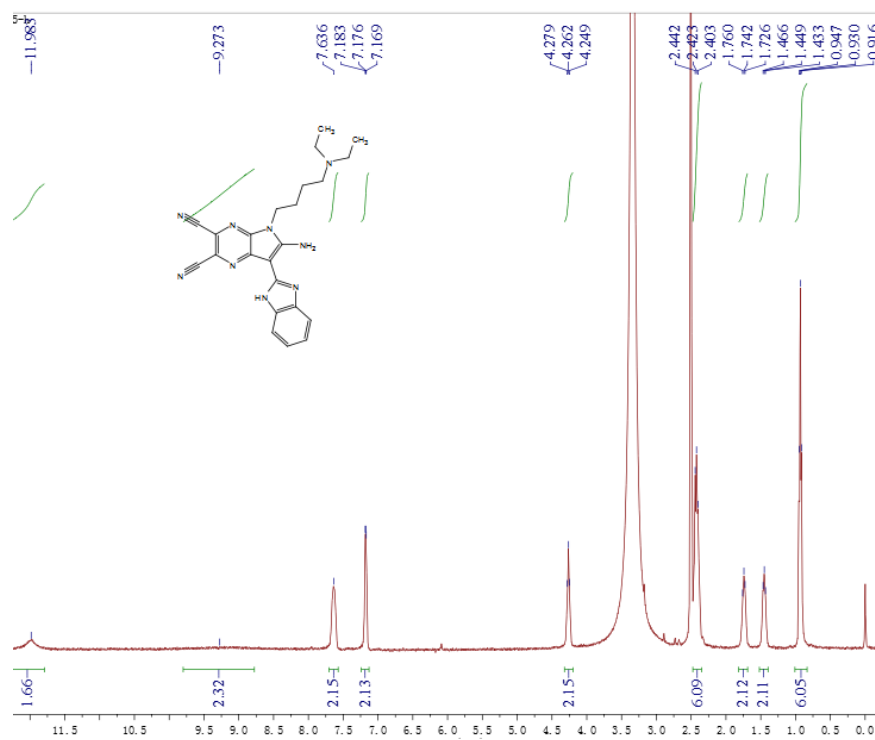

**<sup>1</sup>H NMR (400 MHz, DMSO-*d*<sub>6</sub>) of **3u****

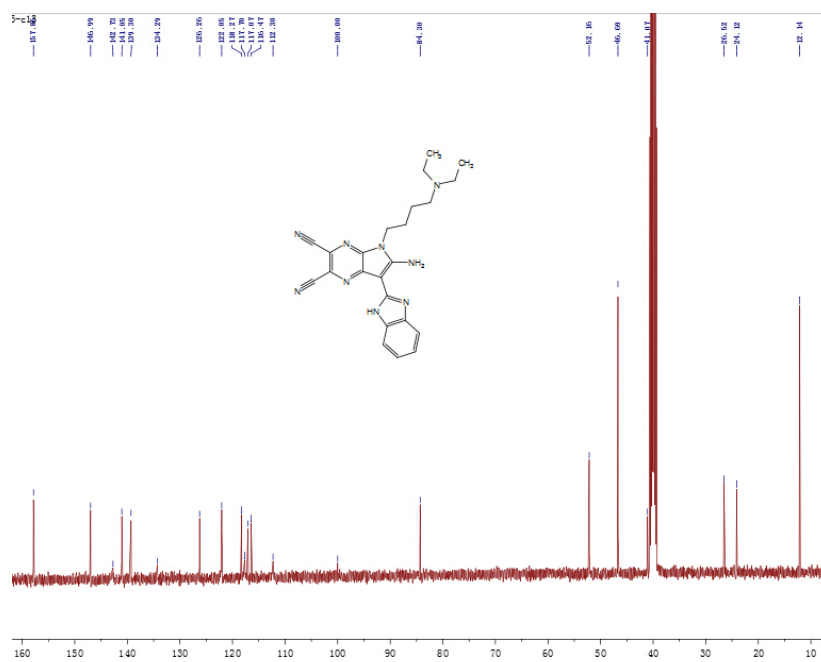

**<sup>13</sup>C NMR (100 MHz, DMSO-*d*<sub>6</sub>) of **3u****

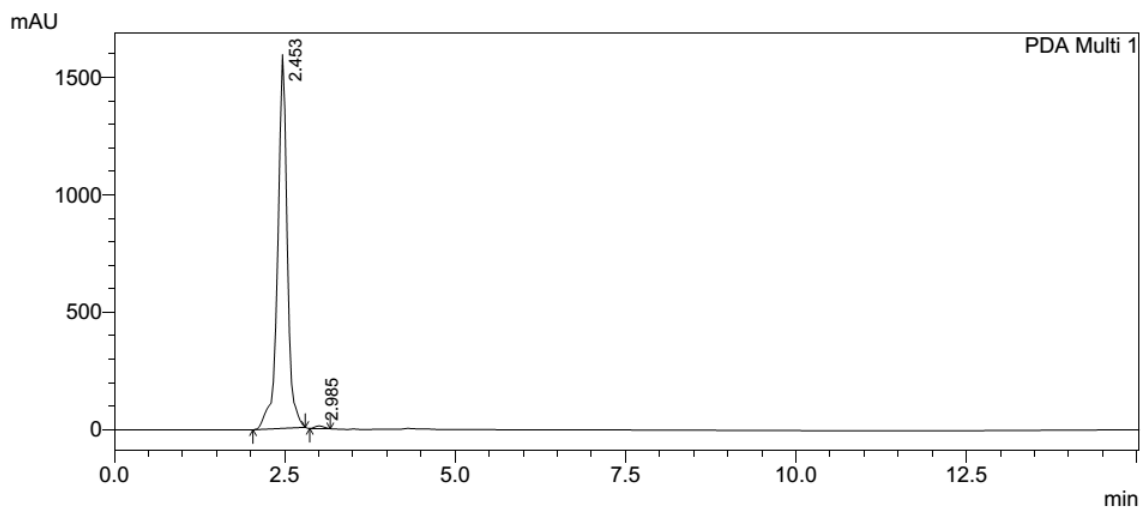

1 PDA Multi 1/254nm 4nm

PeakTable

PDA Ch1 254nm 4nm

| Peak# | Ret. Time | Area     | Height  | Area %  | Height % |
|-------|-----------|----------|---------|---------|----------|
| 1     | 2.453     | 15463068 | 1592643 | 99.308  | 99.280   |
| 2     | 2.985     | 107775   | 11550   | 0.692   | 0.720    |
| Total |           | 15570843 | 1604193 | 100.000 | 100.000  |

HPLC spectrum of **3u**

Event#: 2 MS(E-) Ret. Time : 1.660 -> 1.660 Scan#: 334 -> 334

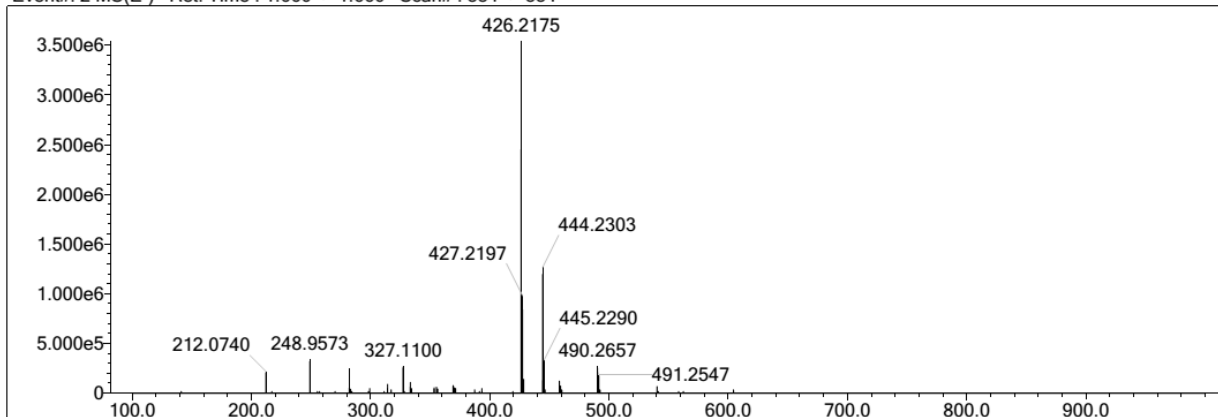

HRMS spectrum of **3u**

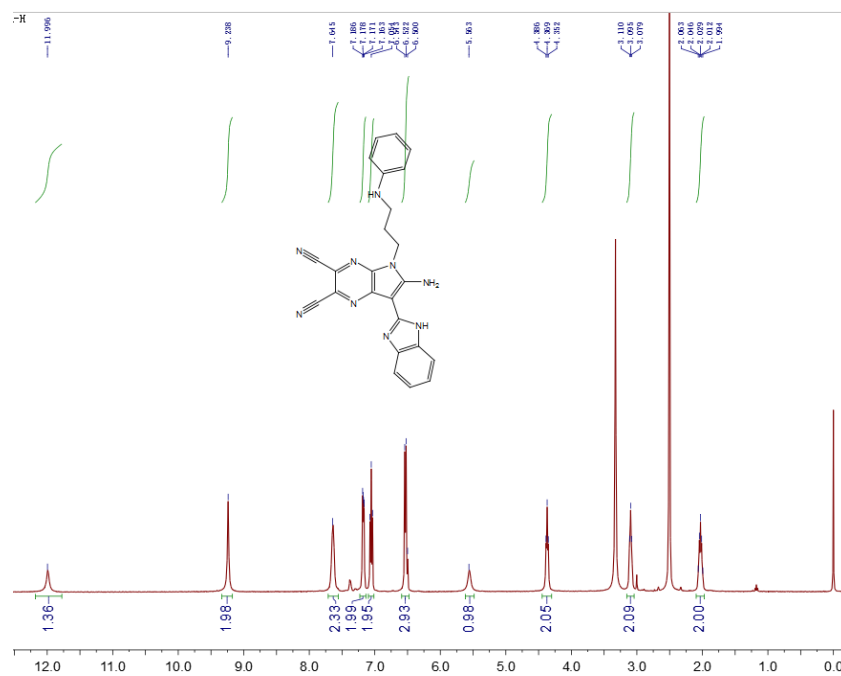

<sup>1</sup>H NMR (400 MHz, CDCl<sub>3</sub>) of **3v**

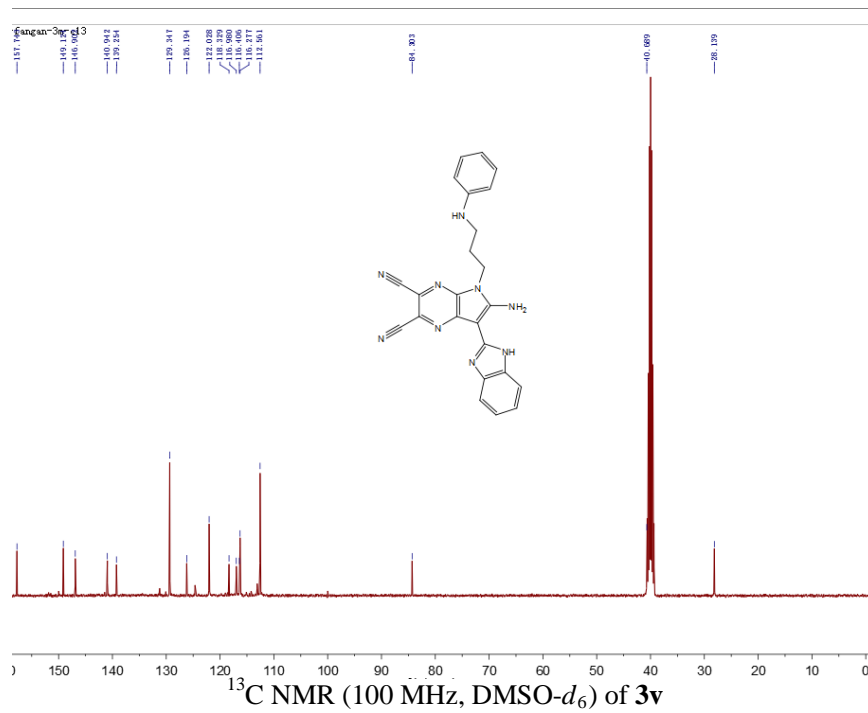

<sup>13</sup>C NMR (100 MHz, DMSO-*d*<sub>6</sub>) of **3v**

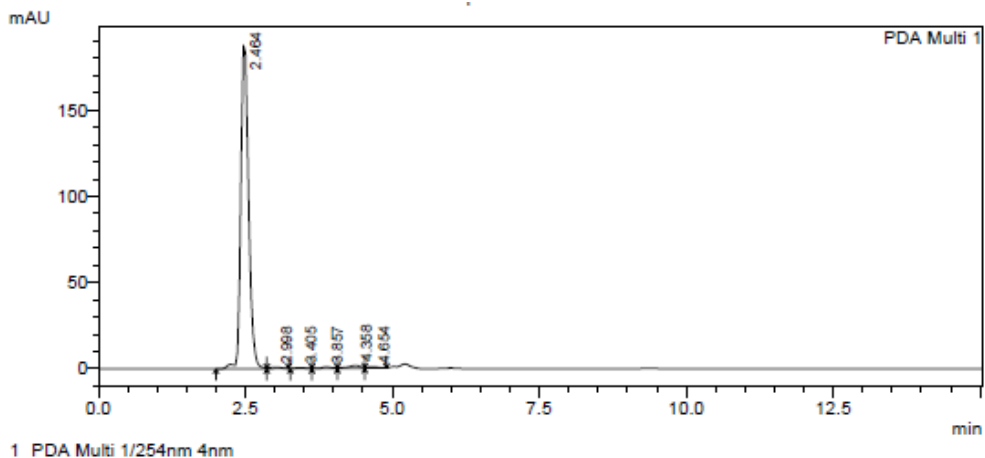

PeakTable

| Peak# | Ret. Time | Area    | Height | Area %  | Height % |
|-------|-----------|---------|--------|---------|----------|
| 1     | 2.464     | 1734937 | 187589 | 97.007  | 97.694   |
| 2     | 2.998     | 9145    | 706    | 0.511   | 0.368    |
| 3     | 3.405     | 3902    | 392    | 0.218   | 0.204    |
| 4     | 3.857     | 8535    | 948    | 0.477   | 0.494    |
| 5     | 4.358     | 23072   | 1613   | 1.290   | 0.840    |
| 6     | 4.654     | 8876    | 768    | 0.496   | 0.400    |
| Total |           | 1788467 | 192016 | 100.000 | 100.000  |

HPLC spectrum of **3v**

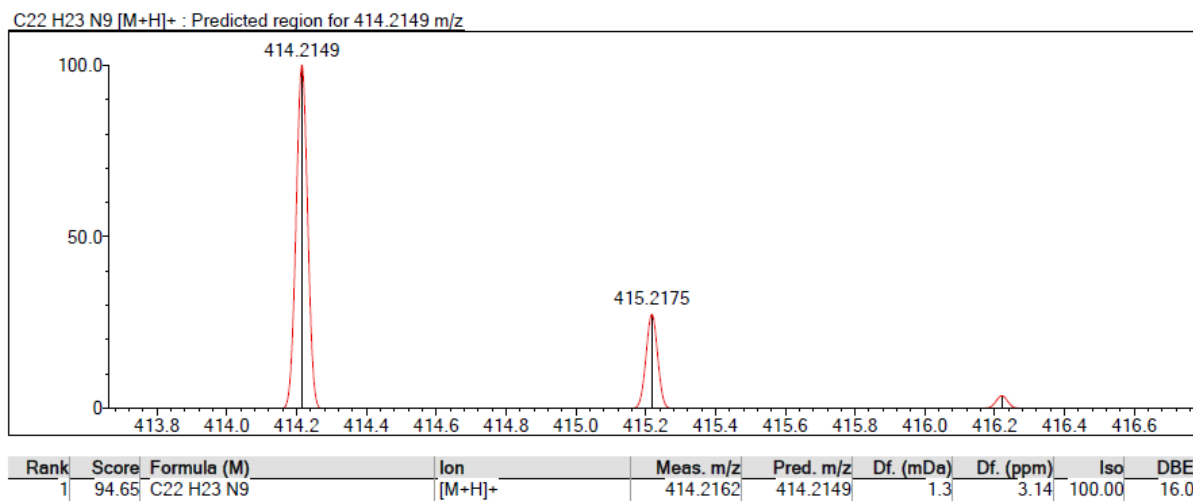

HRMS spectrum of **3v**



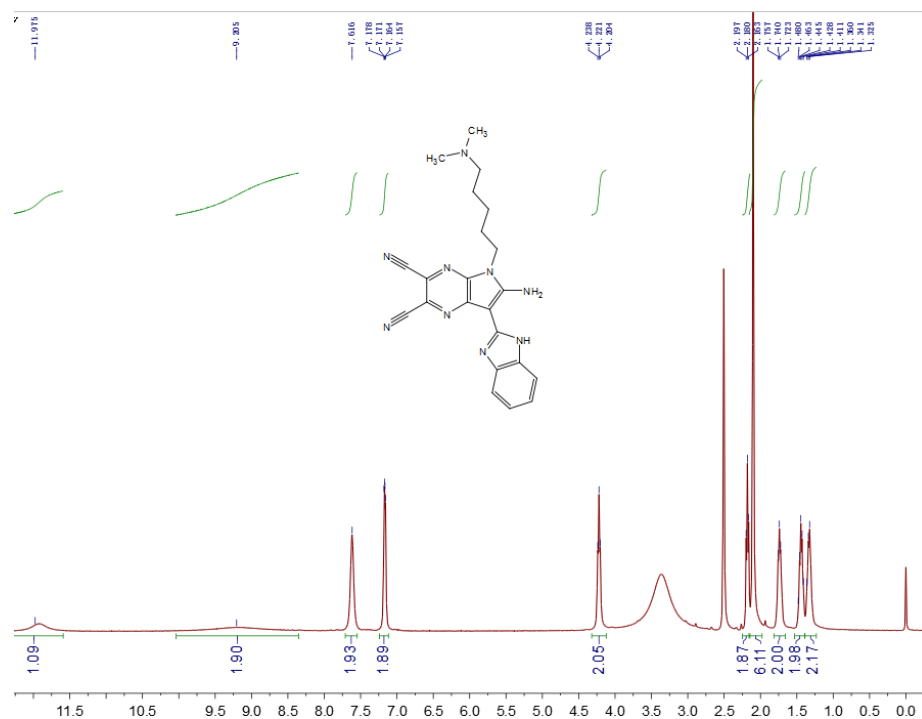

<sup>1</sup>H NMR (400 MHz, CDCl<sub>3</sub>) of **3w**

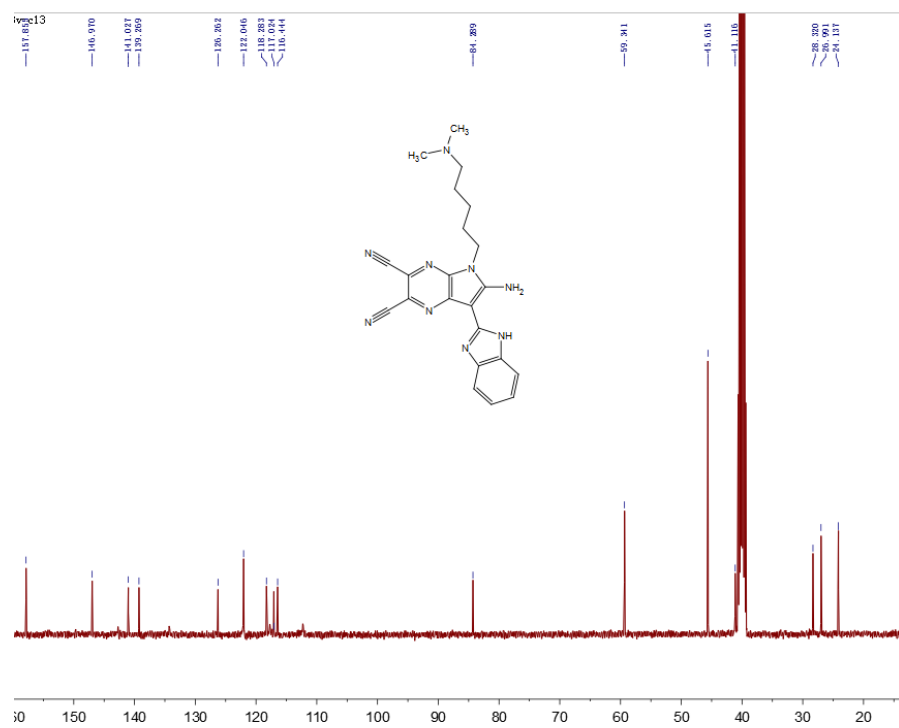

<sup>13</sup>C NMR (100 MHz, DMSO-*d*<sub>6</sub>) of **3w**

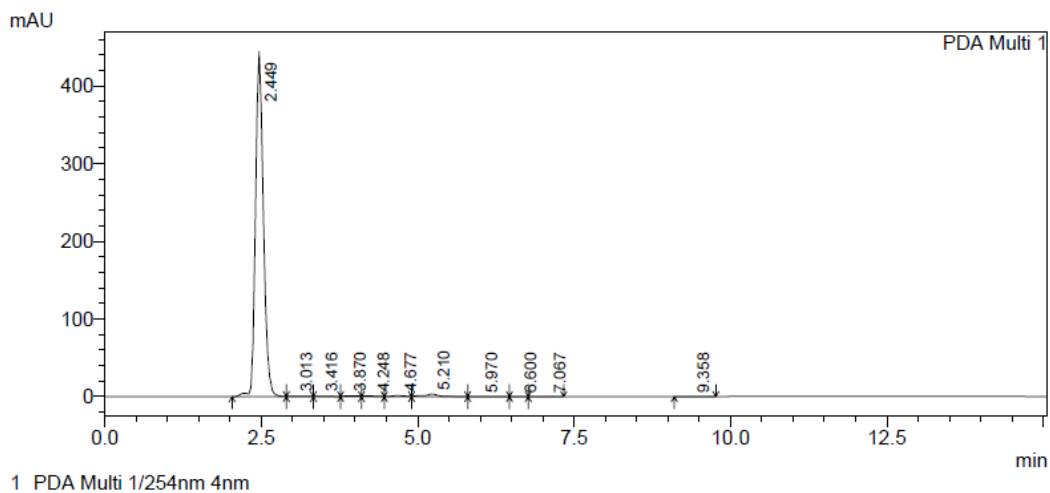

PeakTable

PDA Ch1 254nm 4nm

| Peak# | Ret. Time | Area    | Height | Area %  | Height % |
|-------|-----------|---------|--------|---------|----------|
| 1     | 2.449     | 3892143 | 444597 | 96.900  | 98.236   |
| 2     | 3.013     | 11222   | 686    | 0.279   | 0.152    |
| 3     | 3.416     | 6412    | 401    | 0.160   | 0.089    |
| 4     | 3.870     | 13162   | 1085   | 0.328   | 0.240    |
| 5     | 4.248     | 12897   | 786    | 0.321   | 0.174    |
| 6     | 4.677     | 18664   | 1156   | 0.465   | 0.255    |
| 7     | 5.210     | 50522   | 3193   | 1.258   | 0.705    |
| 8     | 5.970     | 4559    | 234    | 0.113   | 0.052    |
| 9     | 6.600     | 1607    | 139    | 0.040   | 0.031    |
| 10    | 7.067     | 2102    | 88     | 0.052   | 0.019    |
| 11    | 9.358     | 3364    | 217    | 0.084   | 0.048    |
| Total |           | 4016654 | 452581 | 100.000 | 100.000  |

HPLC spectrum of **3w**

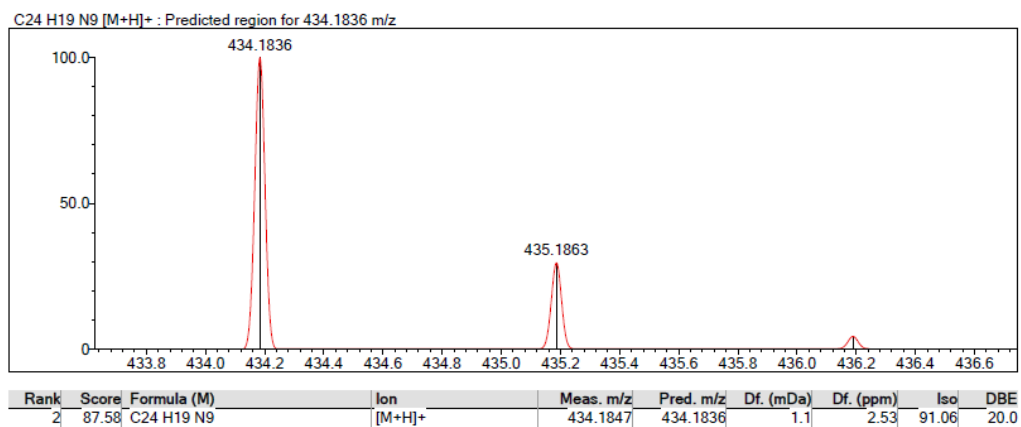

HRMS spectrum of **3w**

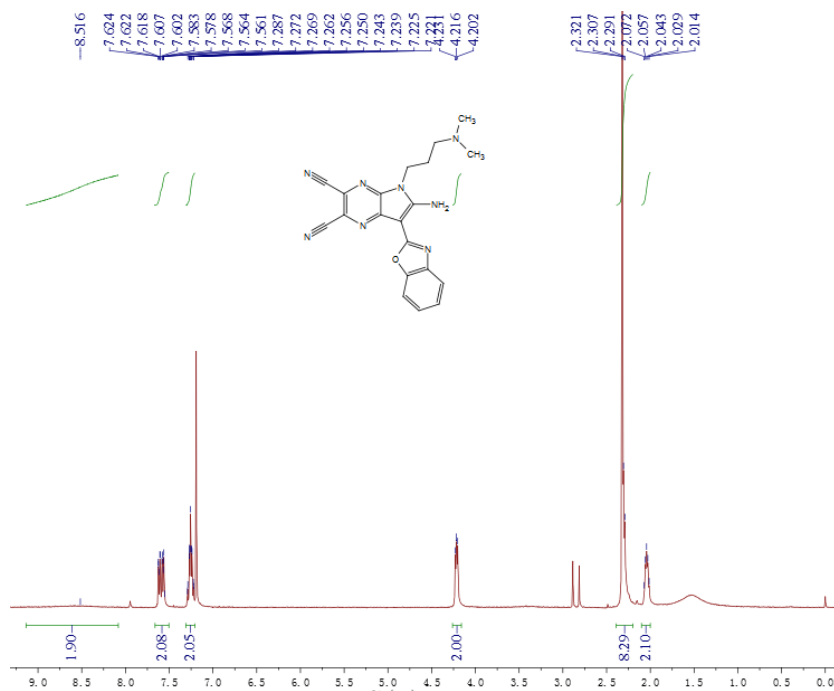

<sup>1</sup>H NMR (400 MHz, CDCl<sub>3</sub>) of **4m**

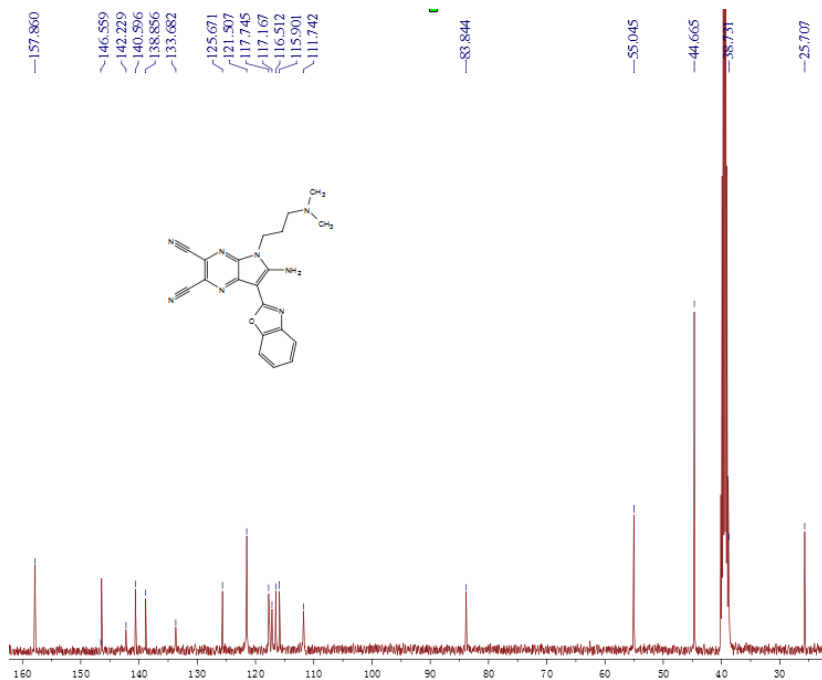

<sup>13</sup>C NMR (100 MHz, DMSO-*d*<sub>6</sub>) of **4m**

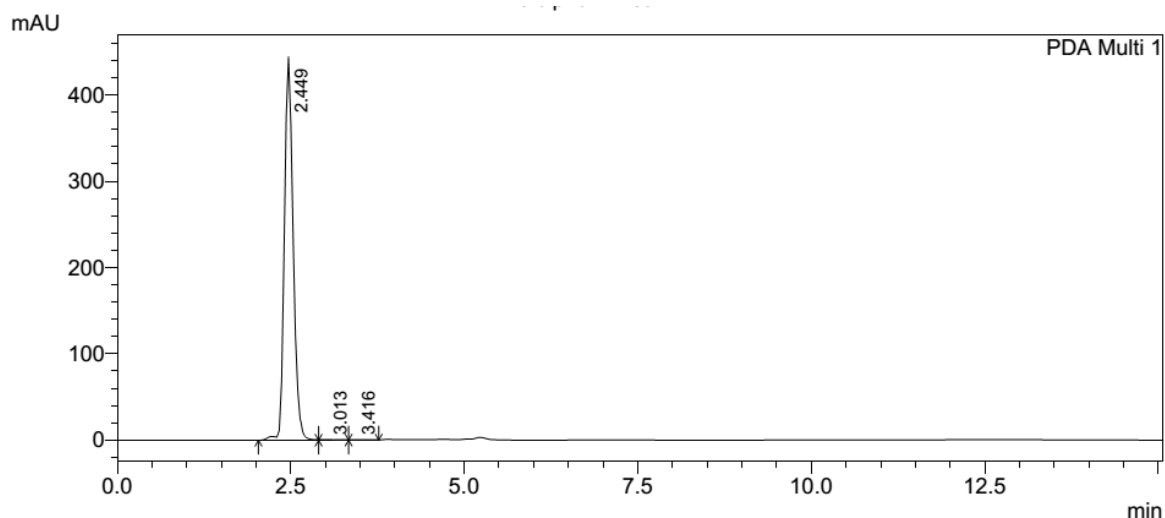

1 PDA Multi 1/254nm 4nm

PeakTable

| PDA Ch1 254nm 4nm |           |         |        |         |          |
|-------------------|-----------|---------|--------|---------|----------|
| Peak#             | Ret. Time | Area    | Height | Area %  | Height % |
| 1                 | 2.449     | 3890856 | 444573 | 99.647  | 99.786   |
| 2                 | 3.013     | 9613    | 630    | 0.246   | 0.141    |
| 3                 | 3.416     | 4158    | 322    | 0.106   | 0.072    |
| Total             |           | 3904627 | 445525 | 100.000 | 100.000  |

HPLC spectrum of **4m**

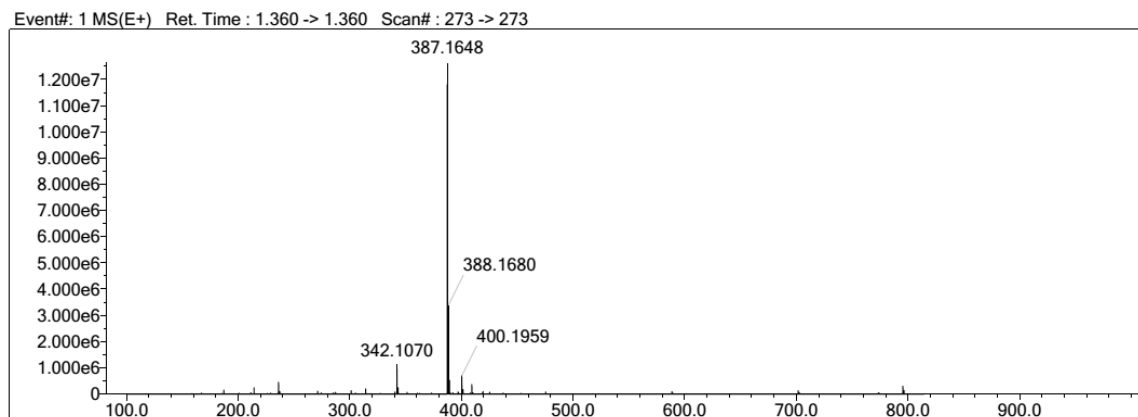

HRMS spectrum of **4m**



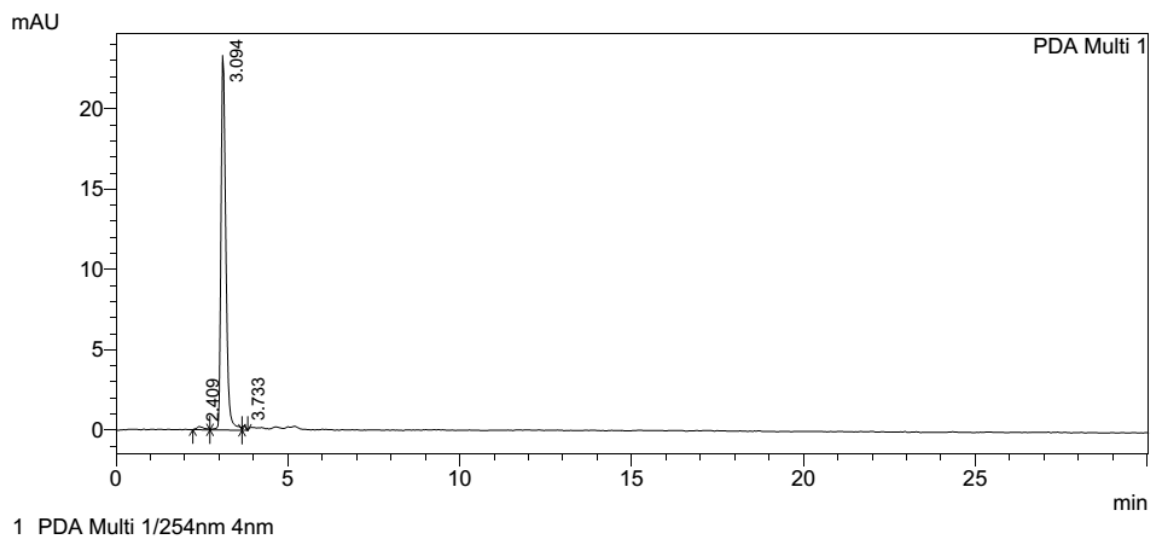

PeakTable

| Peak# | Ret. Time | Area   | Height | Area %  | Height % |
|-------|-----------|--------|--------|---------|----------|
| 1     | 2.409     | 3074   | 207    | 1.309   | 0.868    |
| 2     | 3.094     | 230303 | 23333  | 98.083  | 98.004   |
| 3     | 3.733     | 1428   | 269    | 0.608   | 1.128    |
| Total |           | 234804 | 23808  | 100.000 | 100.000  |

HPLC spectrum of **4s**

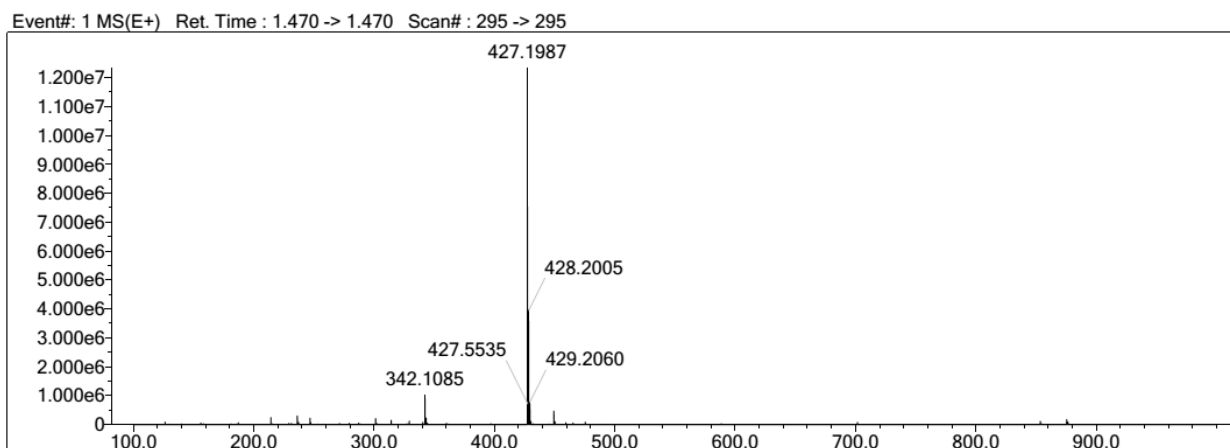

HRMS spectrum of **4s**

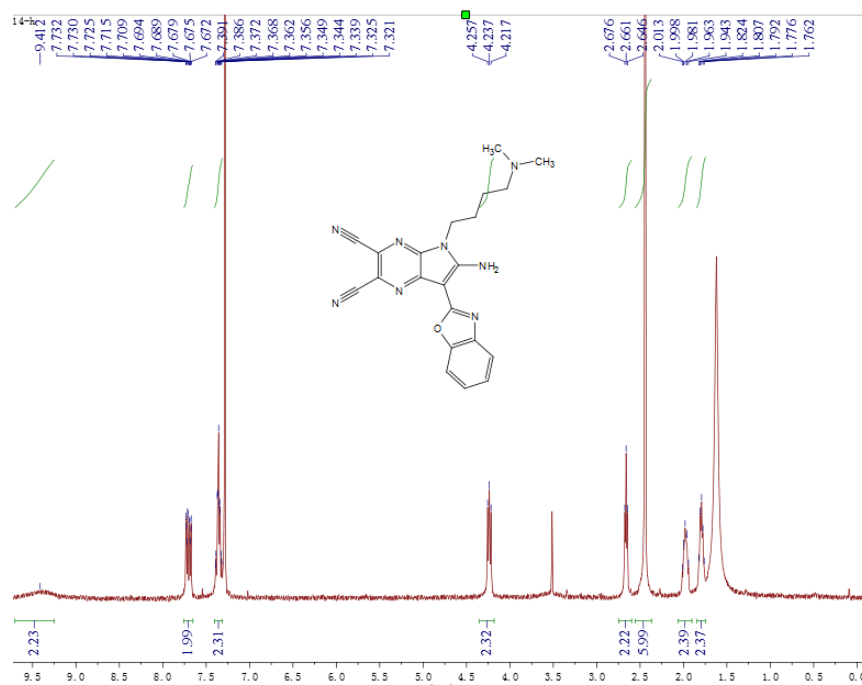

<sup>1</sup>H NMR (400 MHz, CDCl<sub>3</sub>) of **4t**

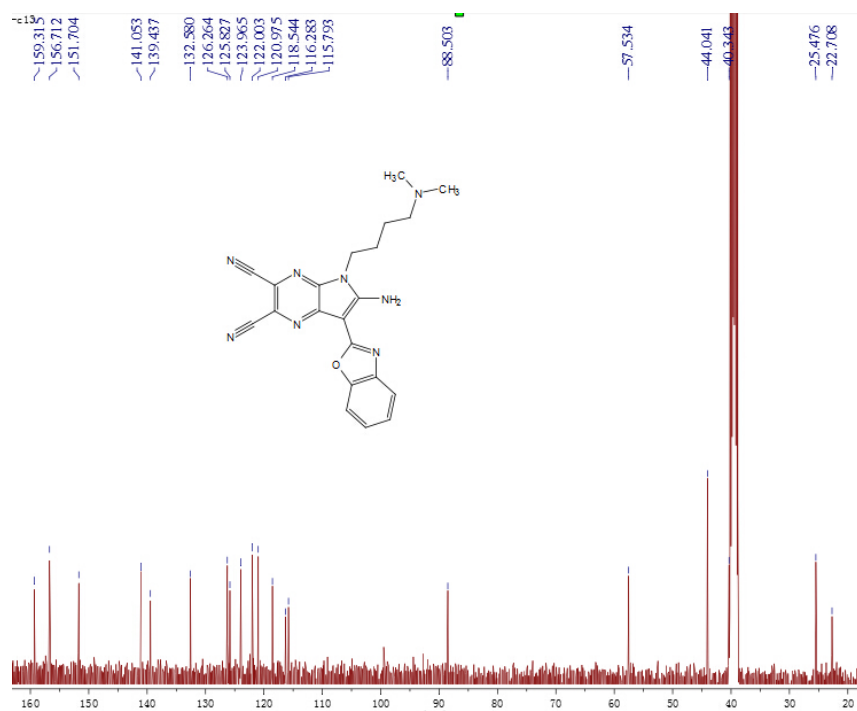

<sup>13</sup>C NMR (100 MHz, DMSO-*d*<sub>6</sub>) of **4t**

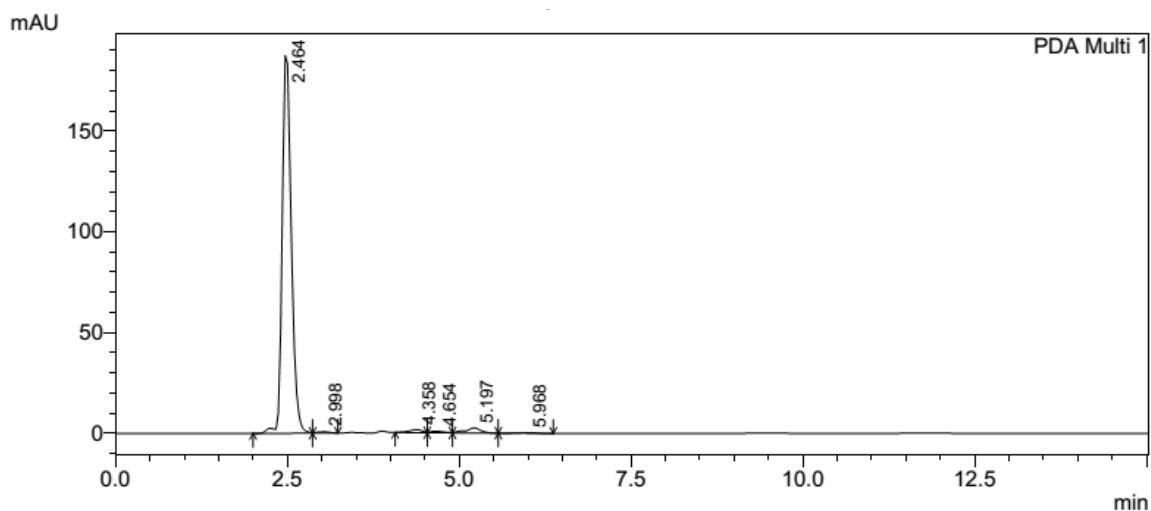

1 PDA Multi 1/254nm 4nm

PeakTable

PDA Ch1 254nm 4nm

| Peak# | Ret. Time | Area    | Height | Area %  | Height % |
|-------|-----------|---------|--------|---------|----------|
| 1     | 2.464     | 1734937 | 187589 | 95.334  | 96.871   |
| 2     | 2.998     | 9145    | 706    | 0.502   | 0.365    |
| 3     | 4.358     | 20626   | 1550   | 1.133   | 0.801    |
| 4     | 4.654     | 10929   | 834    | 0.601   | 0.431    |
| 5     | 5.197     | 38972   | 2581   | 2.142   | 1.333    |
| 6     | 5.968     | 5234    | 387    | 0.288   | 0.200    |
| Total |           | 1819842 | 193648 | 100.000 | 100.000  |

HPLC spectrum of **4t**

Event#: 1 MS(E+) Ret. Time : 1.360 -> 1.360 Scan#: 273 -> 273

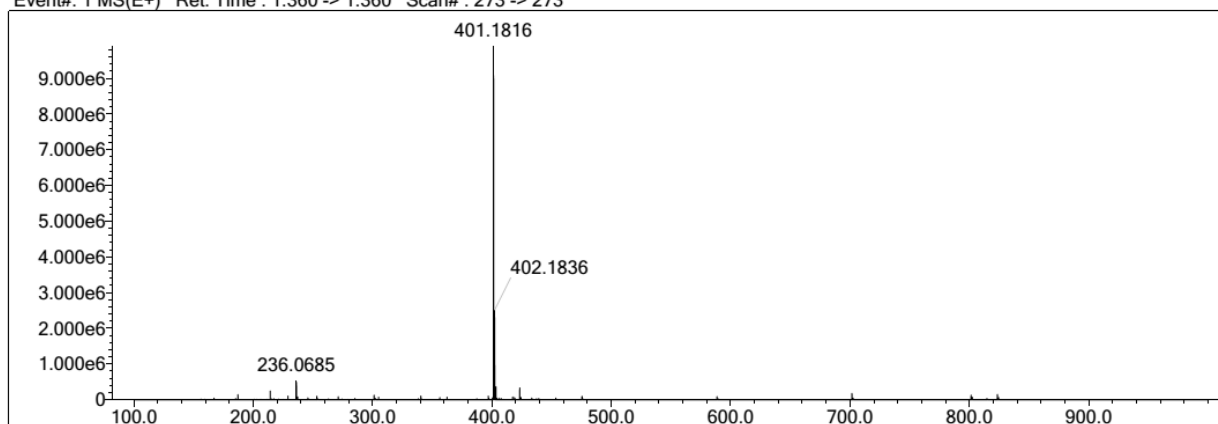

HRMS spectrum of **4t**



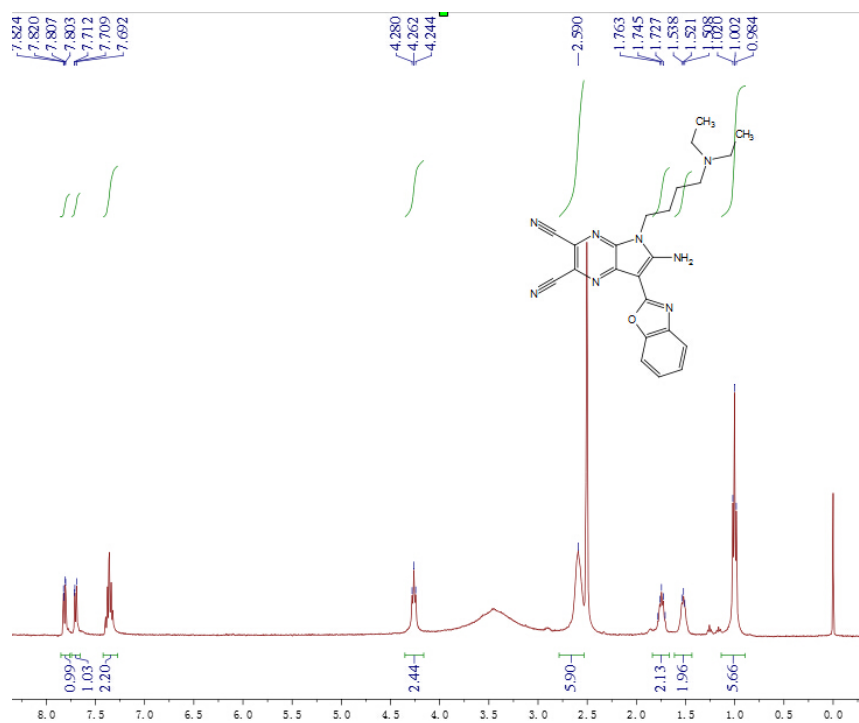

<sup>1</sup>H NMR (400 MHz, DMSO-*d*<sub>6</sub>) of **4u**

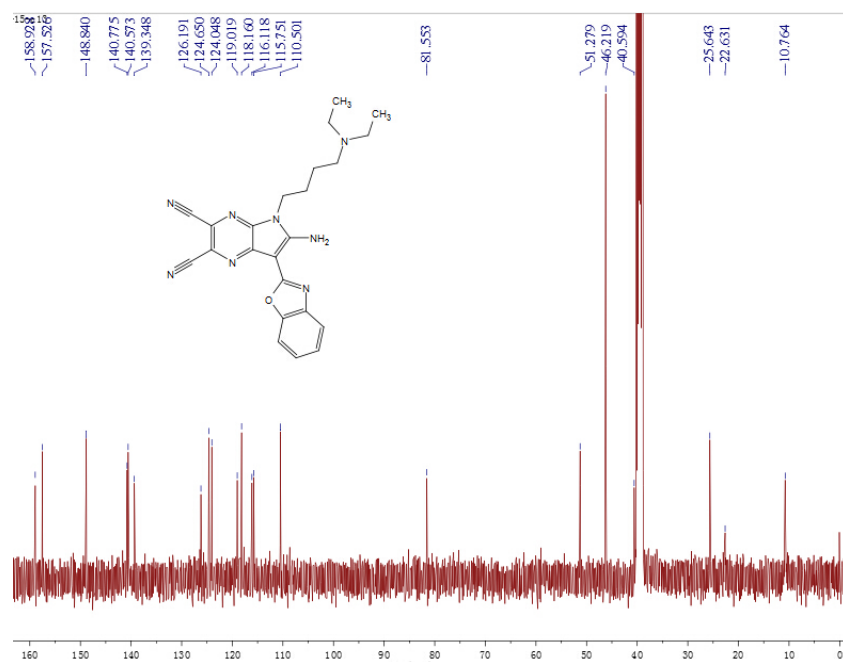

<sup>13</sup>C NMR (100 MHz, DMSO-*d*<sub>6</sub>) of **4u**

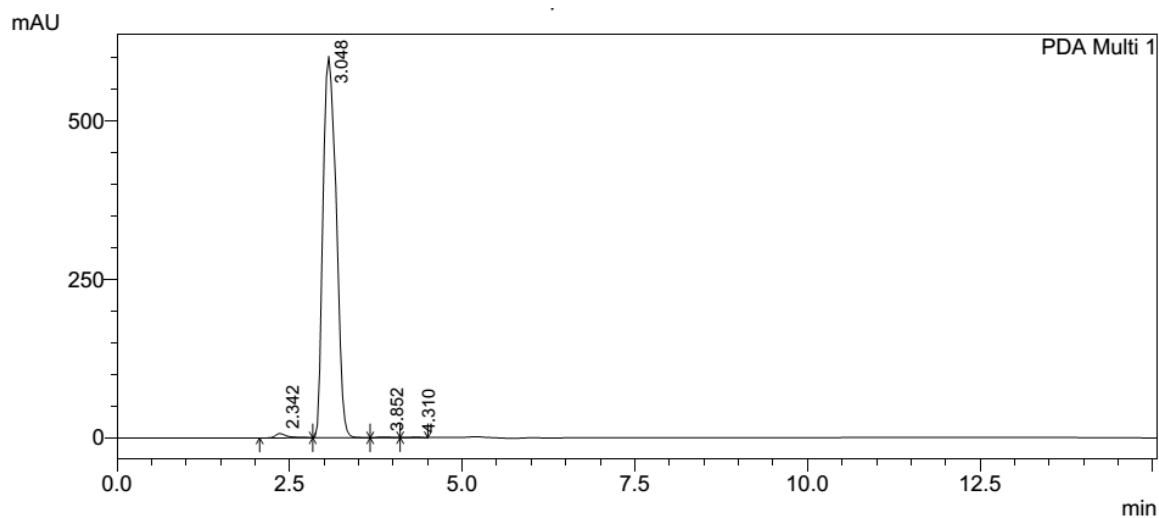

1 PDA Multi 1/254nm 4nm

PeakTable

PDA Ch1 254nm 4nm

| Peak# | Ret. Time | Area    | Height | Area %  | Height % |
|-------|-----------|---------|--------|---------|----------|
| 1     | 2.342     | 84960   | 6950   | 1.045   | 1.136    |
| 2     | 3.048     | 8018747 | 602527 | 98.603  | 98.452   |
| 3     | 3.852     | 16423   | 1472   | 0.202   | 0.241    |
| 4     | 4.310     | 12259   | 1055   | 0.151   | 0.172    |
| Total |           | 8132389 | 612004 | 100.000 | 100.000  |

$^1\text{H}$  NMR (400 MHz,  $\text{DMSO}-d_6$ ) of **4u**

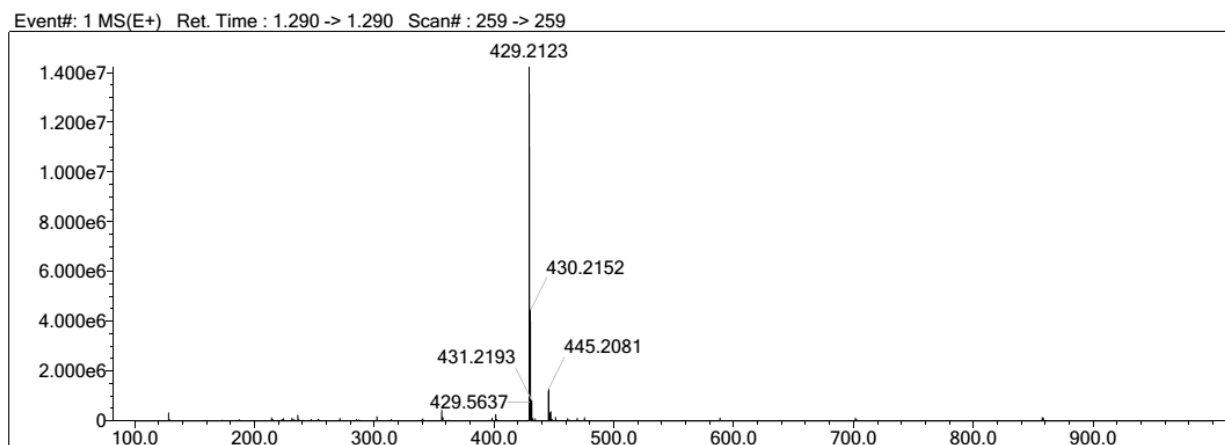

HRMS spectrum of **4u**

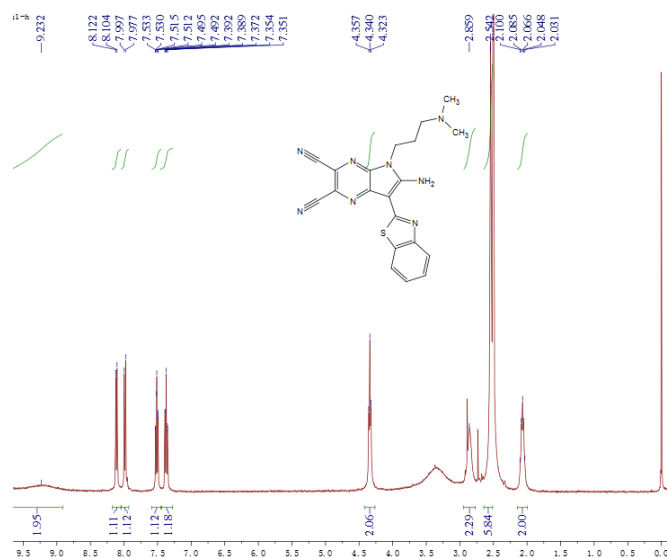

<sup>1</sup>H NMR (400 MHz, DMSO-*d*<sub>6</sub>) of **5m**

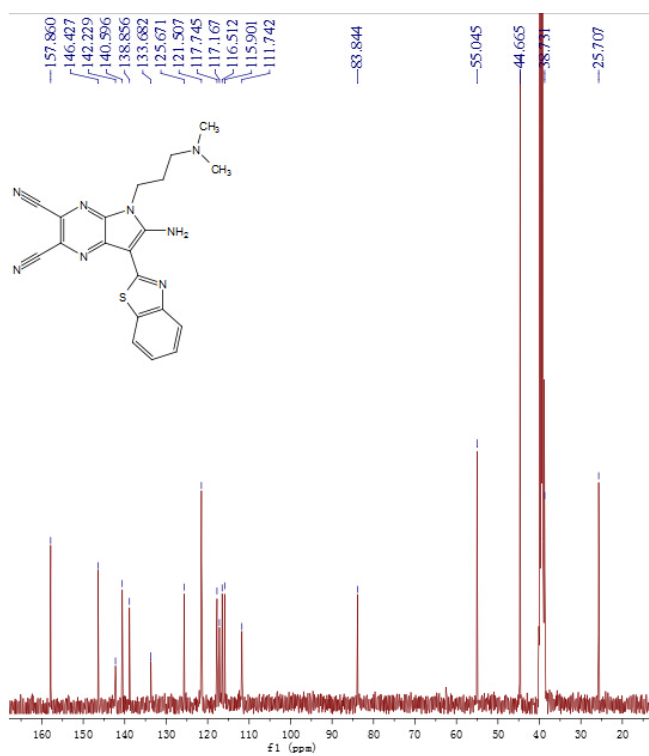

<sup>13</sup>C NMR (100 MHz, DMSO-*d*<sub>6</sub>) of **5m**

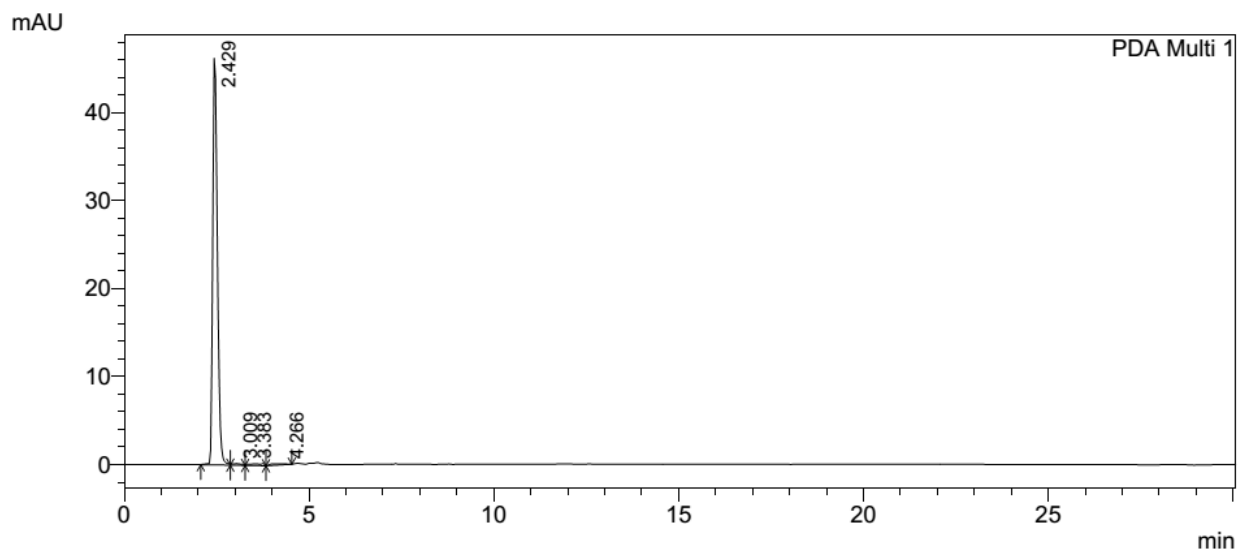

PDA Ch1 254nm 4nm

PeakTable

| Peak# | Ret. Time | Area   | Height | Area %  | Height % |
|-------|-----------|--------|--------|---------|----------|
| 1     | 2.429     | 408159 | 46214  | 96.806  | 98.926   |
| 2     | 3.009     | 3630   | 193    | 0.861   | 0.413    |
| 3     | 3.383     | 5533   | 184    | 1.312   | 0.394    |
| 4     | 4.266     | 4304   | 125    | 1.021   | 0.267    |
| Total |           | 421625 | 46716  | 100.000 | 100.000  |

HPLC spectrum of **5m**

Event#: 1 MS(E+) Ret. Time : 1.550 -> 1.550 Scan#: 311 -> 311

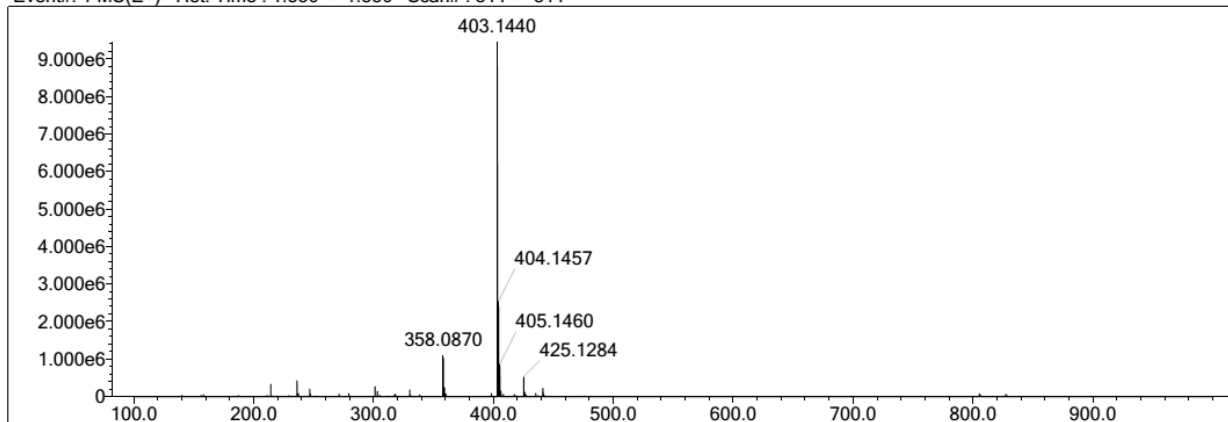

HRMS spectrum of **5m**

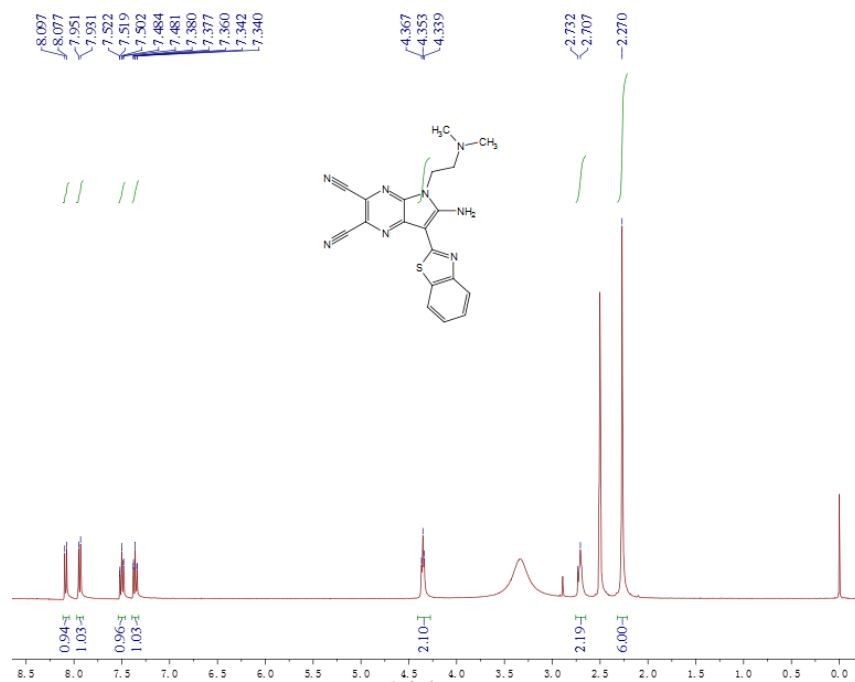

<sup>1</sup>H NMR (400 MHz, DMSO-*d*<sub>6</sub>) of **5c**

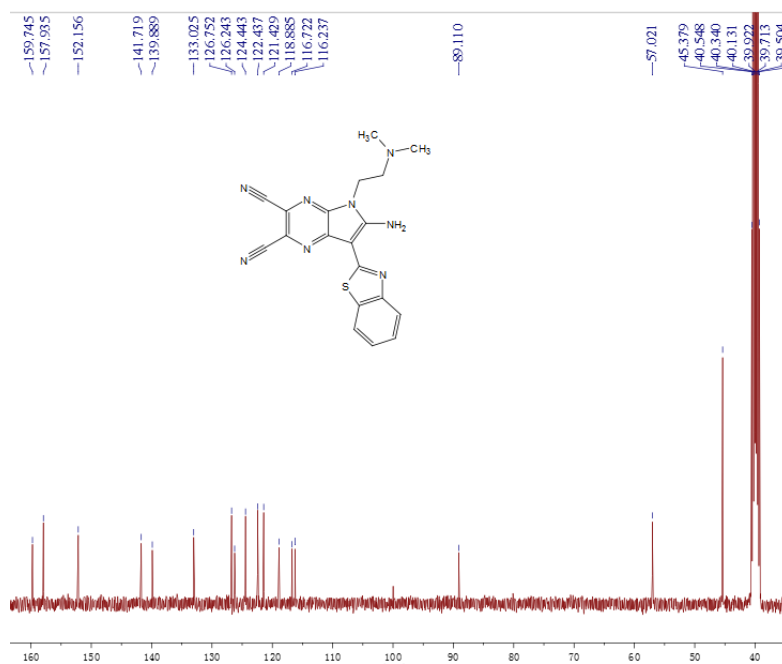

<sup>13</sup>C NMR (100 MHz, DMSO-*d*<sub>6</sub>) of **5c**

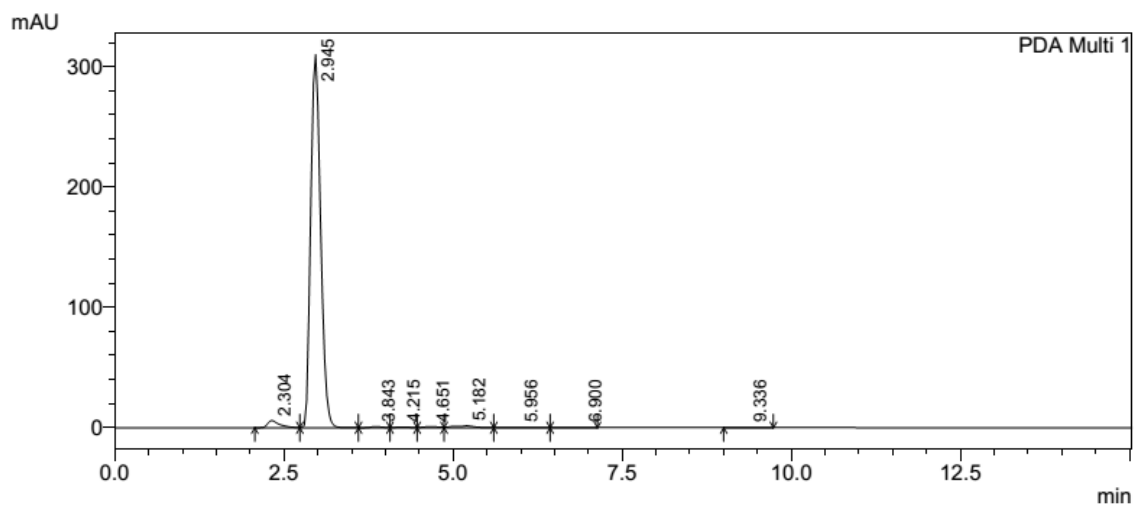

PeakTable

PDA Ch1 254nm 4nm

| Peak# | Ret. Time | Area    | Height | Area %  | Height % |
|-------|-----------|---------|--------|---------|----------|
| 1     | 2.304     | 73831   | 5963   | 2.226   | 1.857    |
| 2     | 2.945     | 3164434 | 310263 | 95.387  | 96.639   |
| 3     | 3.843     | 12101   | 1093   | 0.365   | 0.340    |
| 4     | 4.215     | 8685    | 512    | 0.262   | 0.159    |
| 5     | 4.651     | 14401   | 950    | 0.434   | 0.296    |
| 6     | 5.182     | 32280   | 1661   | 0.973   | 0.517    |
| 7     | 5.956     | 4226    | 218    | 0.127   | 0.068    |
| 8     | 6.900     | 1836    | 62     | 0.055   | 0.019    |
| 9     | 9.336     | 5685    | 331    | 0.171   | 0.103    |
| Total |           | 3317480 | 321054 | 100.000 | 100.000  |

HPLC spectrum of **5c**

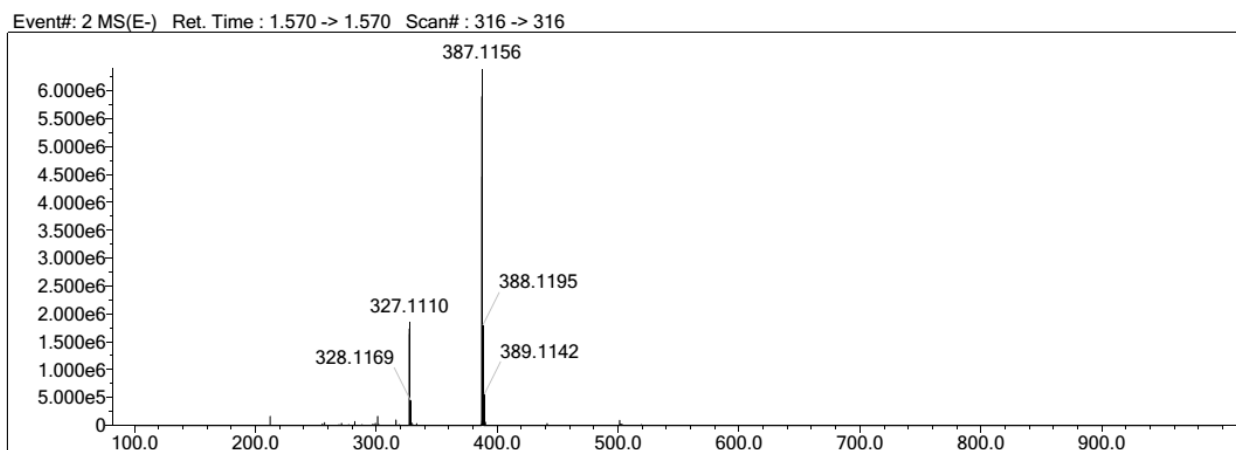

HRMS spectrum of **5c**

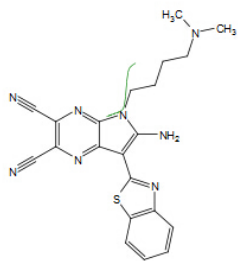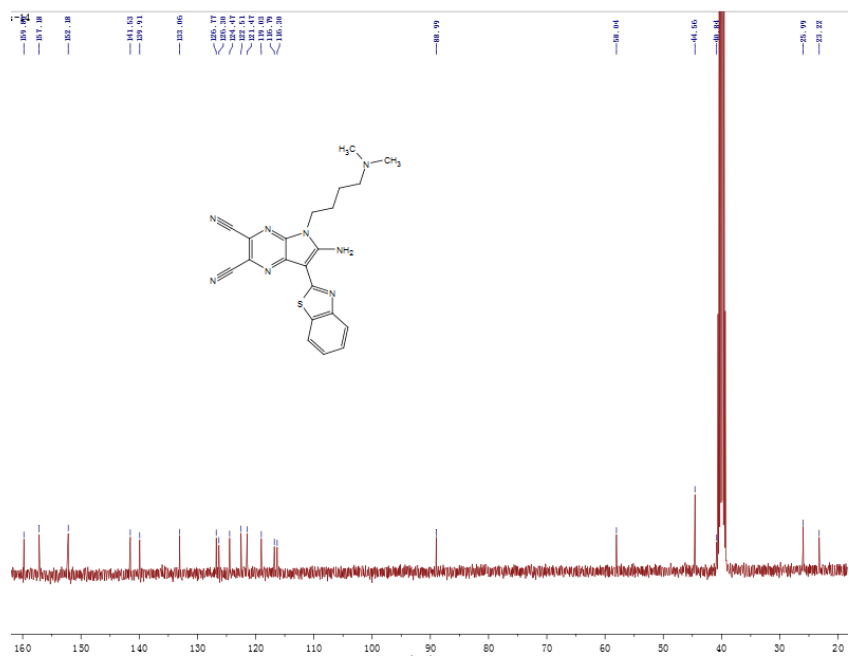

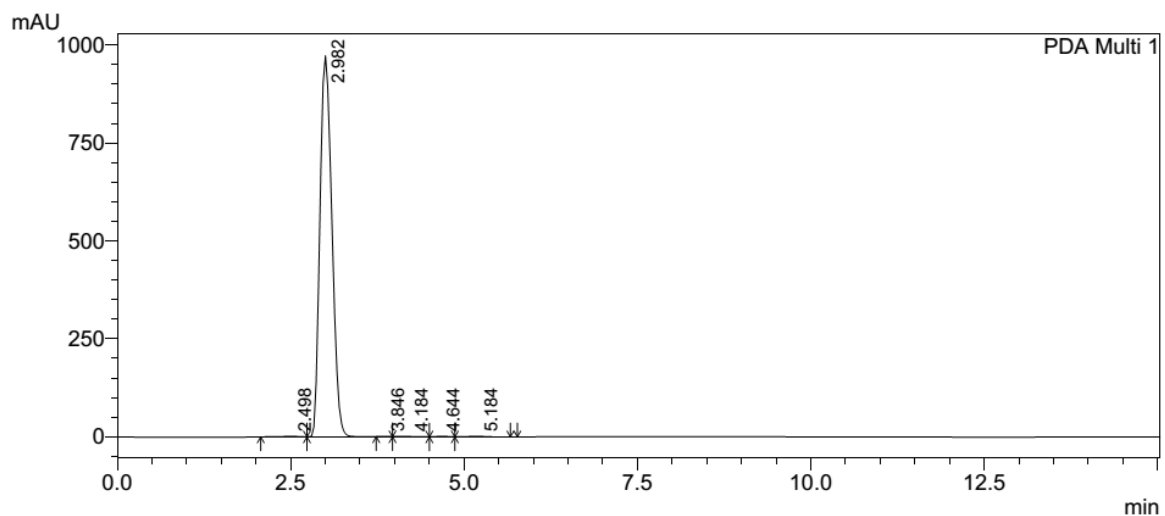

PeakTable

PDA Ch1 254nm 4nm

| Peak# | Ret. Time | Area     | Height | Area %  | Height % |
|-------|-----------|----------|--------|---------|----------|
| 1     | 2.498     | 29389    | 1521   | 0.248   | 0.155    |
| 2     | 2.982     | 11737626 | 973178 | 99.162  | 99.408   |
| 3     | 3.846     | 9695     | 1053   | 0.082   | 0.108    |
| 4     | 4.184     | 19081    | 733    | 0.161   | 0.075    |
| 5     | 4.644     | 12833    | 926    | 0.108   | 0.095    |
| 6     | 5.184     | 28148    | 1558   | 0.238   | 0.159    |
| Total |           | 11836772 | 978969 | 100.000 | 100.000  |

HPLC spectrum of **5t**

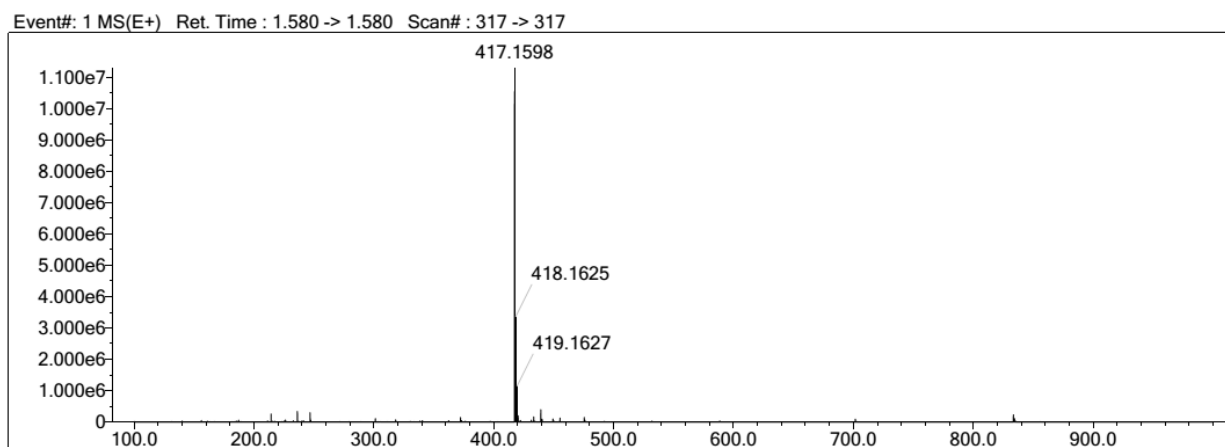

HRMS spectrum of **5t**



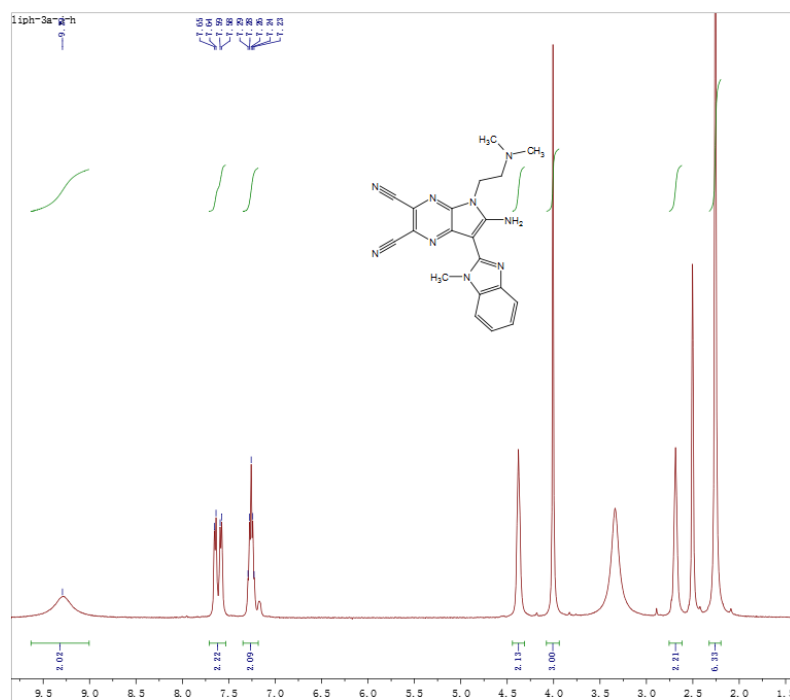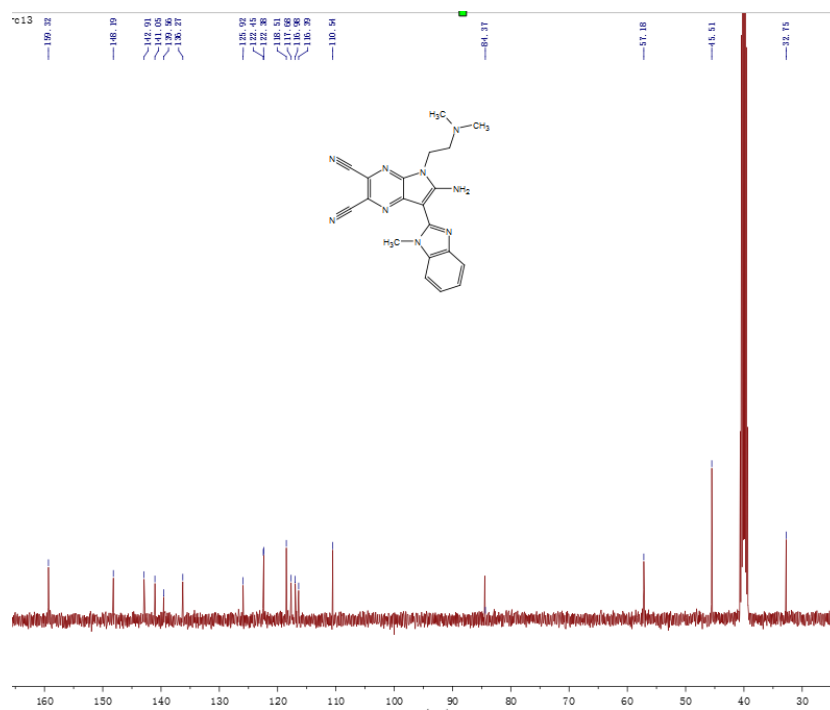

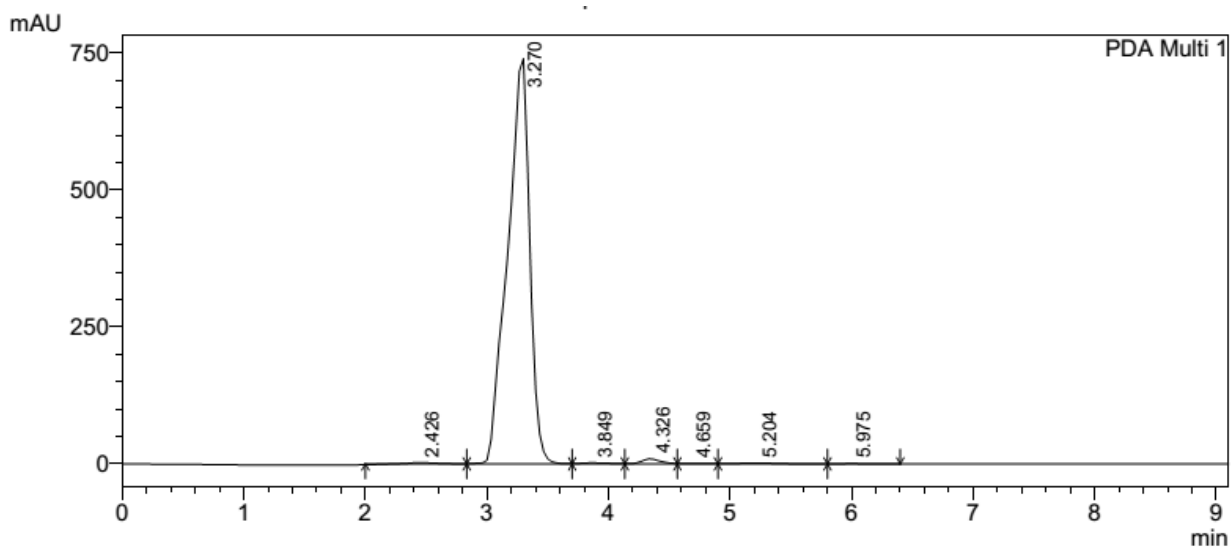

PeakTable

PDA Ch1 254nm 4nm

| Peak# | Ret. Time | Area    | Height | Area %  | Height % |
|-------|-----------|---------|--------|---------|----------|
| 1     | 2.426     | 41024   | 2562   | 0.429   | 0.338    |
| 2     | 3.270     | 9328333 | 740436 | 97.556  | 97.702   |
| 3     | 3.849     | 33990   | 2352   | 0.355   | 0.310    |
| 4     | 4.326     | 101766  | 9085   | 1.064   | 1.199    |
| 5     | 4.659     | 15929   | 1131   | 0.167   | 0.149    |
| 6     | 5.204     | 33863   | 1748   | 0.354   | 0.231    |
| 7     | 5.975     | 7119    | 539    | 0.074   | 0.071    |
| Total |           | 9562024 | 757853 | 100.000 | 100.000  |

HPLC spectrum of **6c**

Event#: 1 MS(E+) Ret. Time : 0.693 -> 0.693 Scan#: 105 -> 105

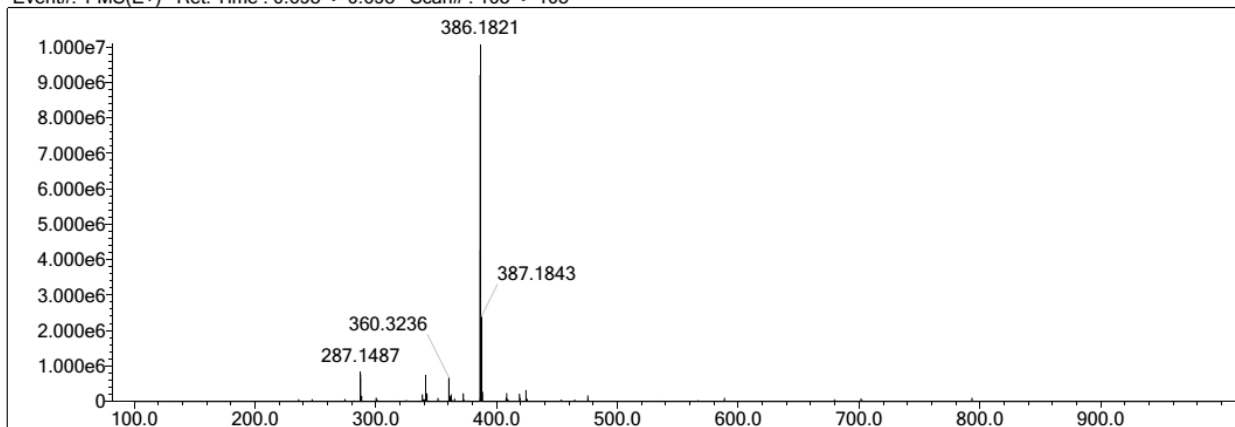

HRMS spectrum of **6c**

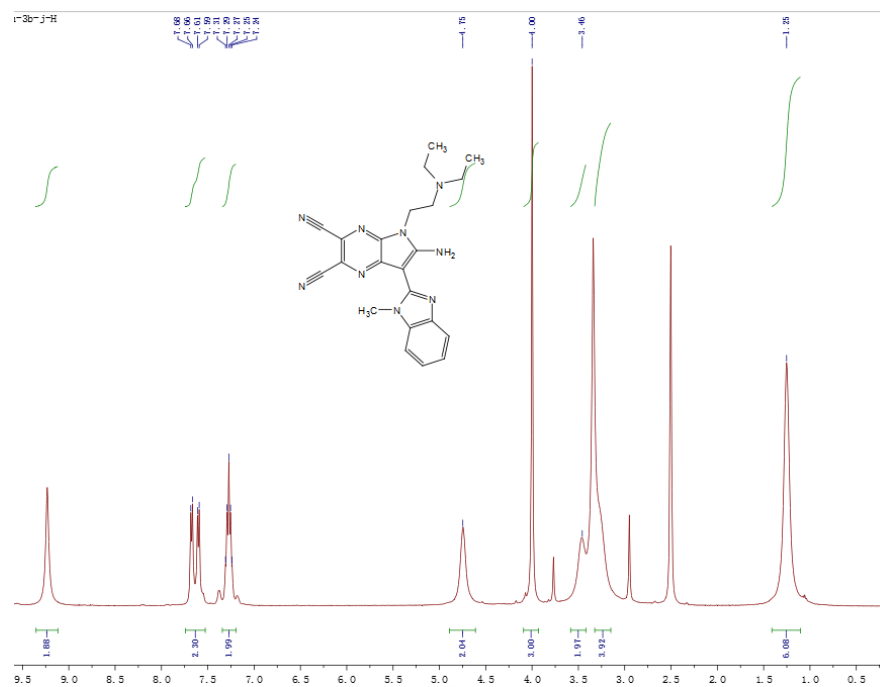

<sup>1</sup>H NMR (400 MHz, DMSO-*d*<sub>6</sub>) of **6d**

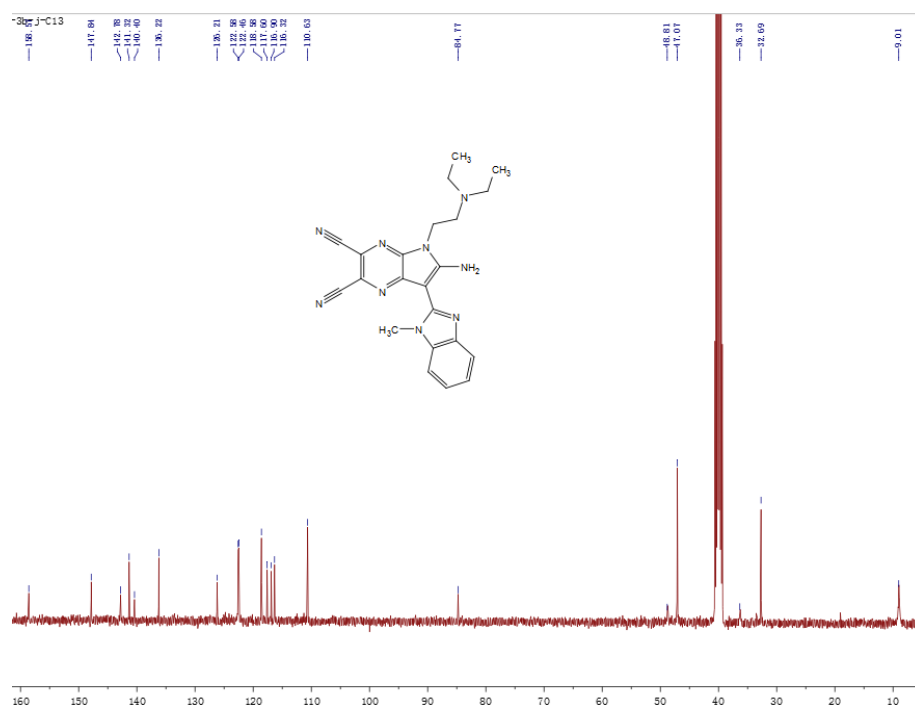

<sup>13</sup>C NMR (100 MHz, DMSO-*d*<sub>6</sub>) of **6d**

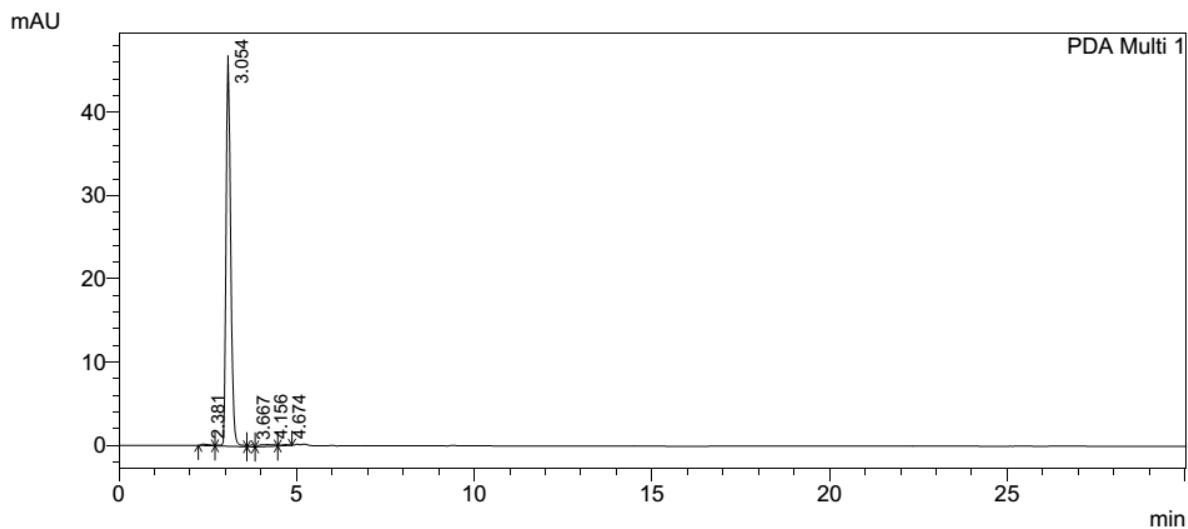

1 PDA Multi 1/254nm 4nm

PeakTable

PDA Ch1 254nm 4nm

| Peak# | Ret. Time | Area   | Height | Area %  | Height % |
|-------|-----------|--------|--------|---------|----------|
| 1     | 2.381     | 3094   | 168    | 0.702   | 0.353    |
| 2     | 3.054     | 426908 | 46944  | 96.880  | 98.508   |
| 3     | 3.667     | 2292   | 186    | 0.520   | 0.391    |
| 4     | 4.156     | 6389   | 226    | 1.450   | 0.473    |
| 5     | 4.674     | 1973   | 131    | 0.448   | 0.275    |
| Total |           | 440657 | 47655  | 100.000 | 100.000  |

HPLC spectrum of **6d**

Event#: 1 MS(E+) Ret. Time : 0.667 -> 0.667 Scan# : 101 -> 101

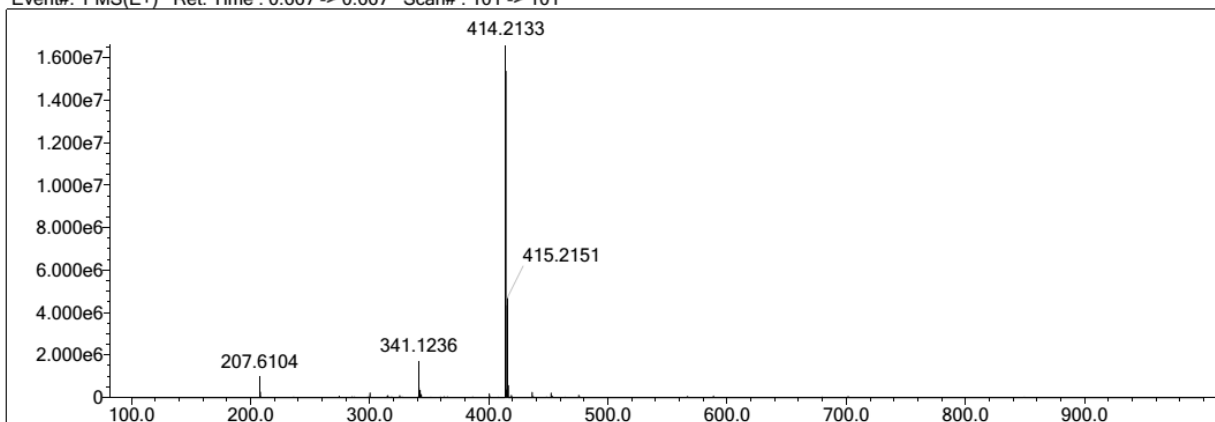

HRMS spectrum of **6d**

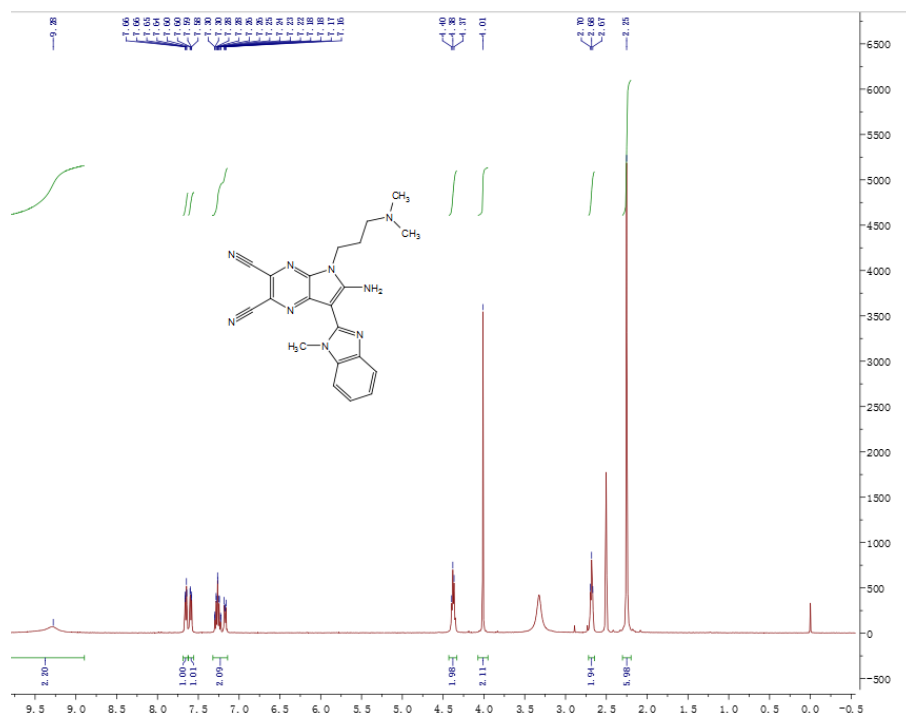

<sup>1</sup>H NMR (400 MHz, DMSO-*d*<sub>6</sub>) of **6m**

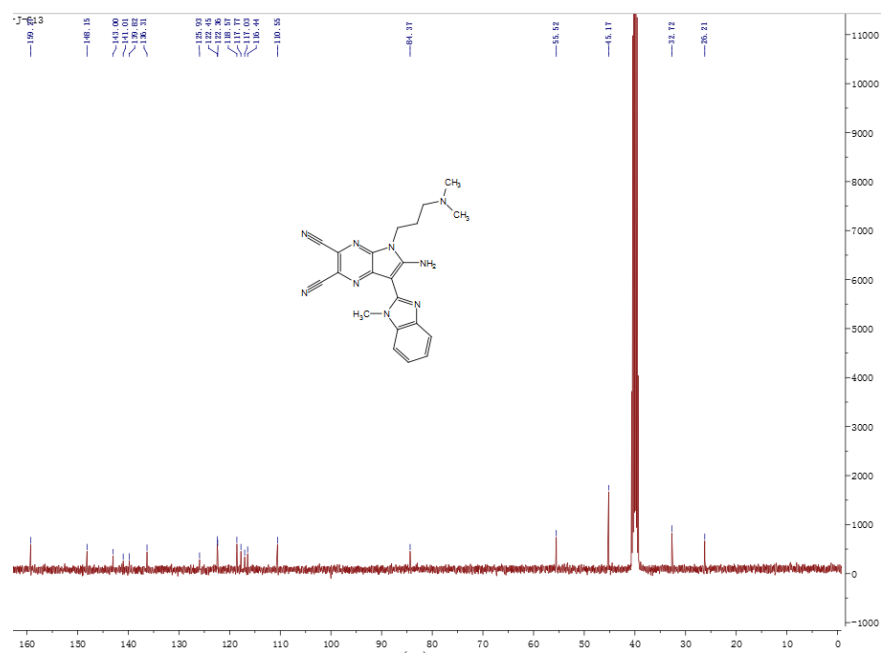

<sup>13</sup>C NMR (100 MHz, DMSO-*d*<sub>6</sub>) of **6m**

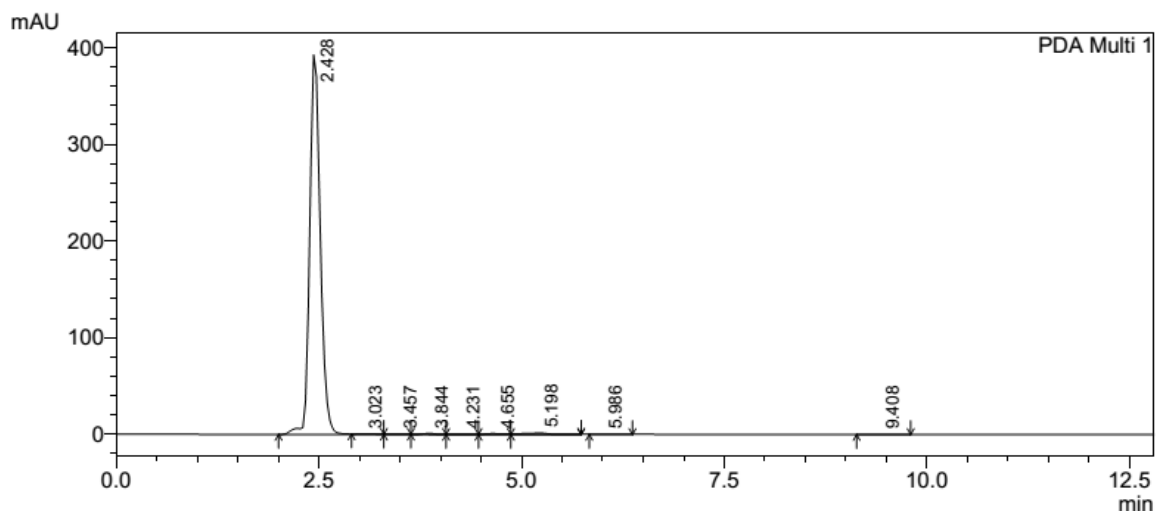

1 PDA Multi 1/254nm 4nm

PeakTable

| Peak# | Ret. Time | Area    | Height | Area %  | Height % |
|-------|-----------|---------|--------|---------|----------|
| 1     | 2.428     | 3588432 | 393141 | 98.049  | 98.765   |
| 2     | 3.023     | 4612    | 273    | 0.126   | 0.068    |
| 3     | 3.457     | 1937    | 175    | 0.053   | 0.044    |
| 4     | 3.844     | 9251    | 1141   | 0.253   | 0.287    |
| 5     | 4.231     | 6626    | 414    | 0.181   | 0.104    |
| 6     | 4.655     | 13461   | 903    | 0.368   | 0.227    |
| 7     | 5.198     | 28810   | 1521   | 0.787   | 0.382    |
| 8     | 5.986     | 3554    | 287    | 0.097   | 0.072    |
| 9     | 9.408     | 3151    | 204    | 0.086   | 0.051    |
| Total |           | 3659834 | 398058 | 100.000 | 100.000  |

HPLC spectrum of **6m**

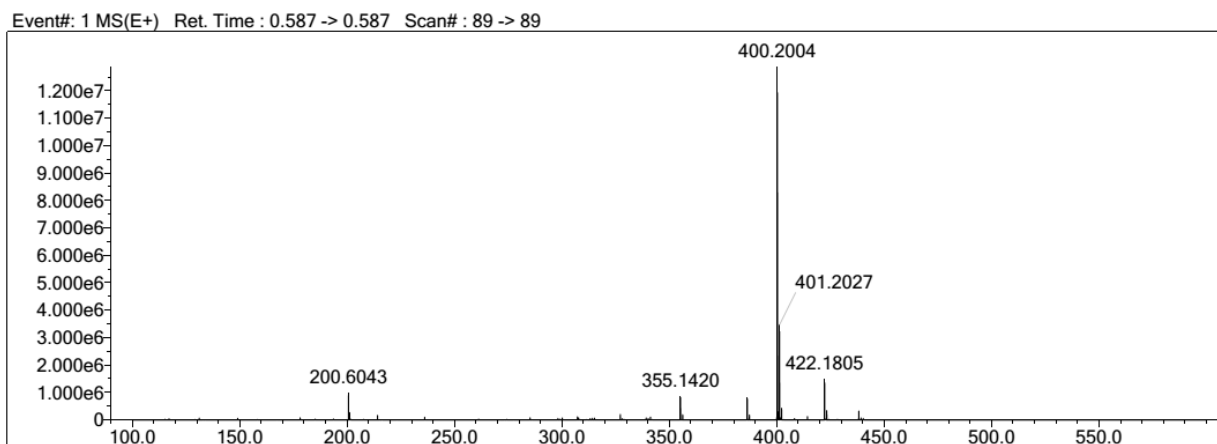

HRMS spectrum of **6m**

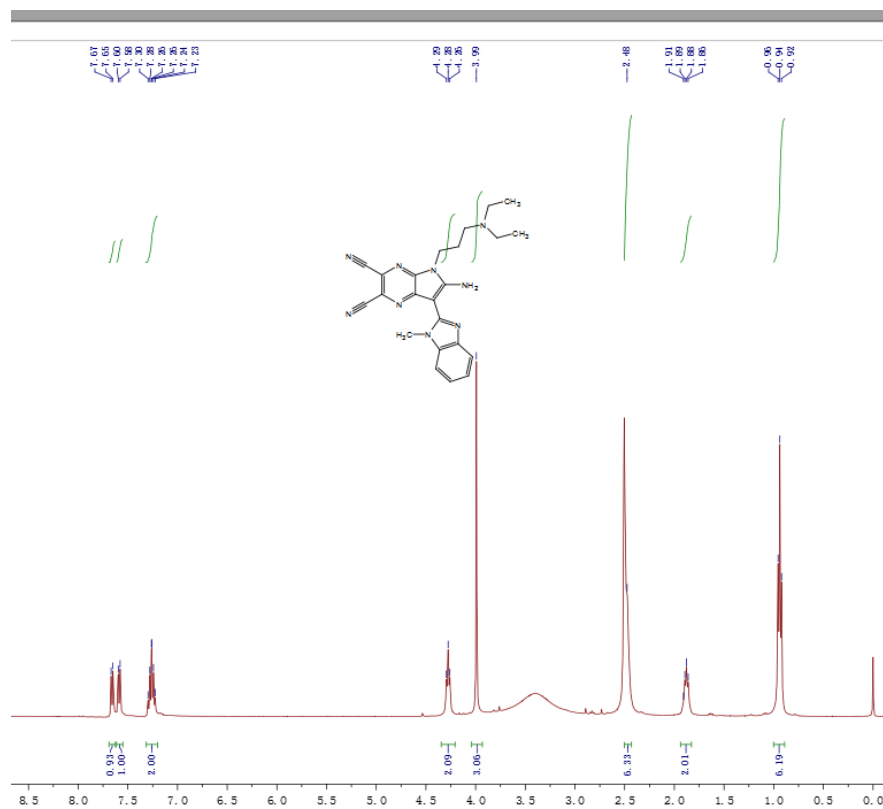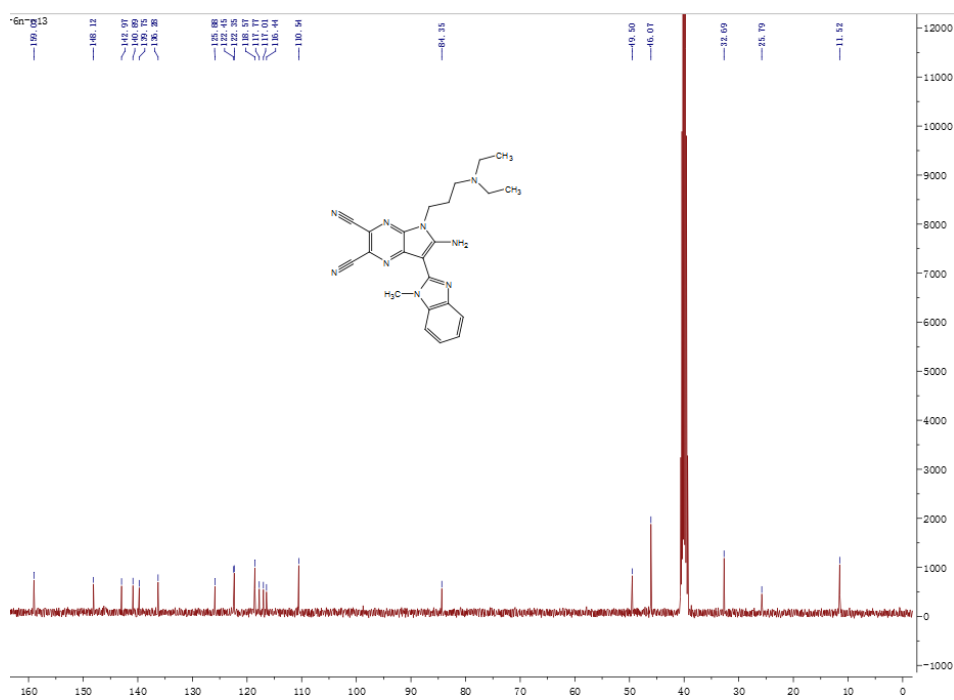

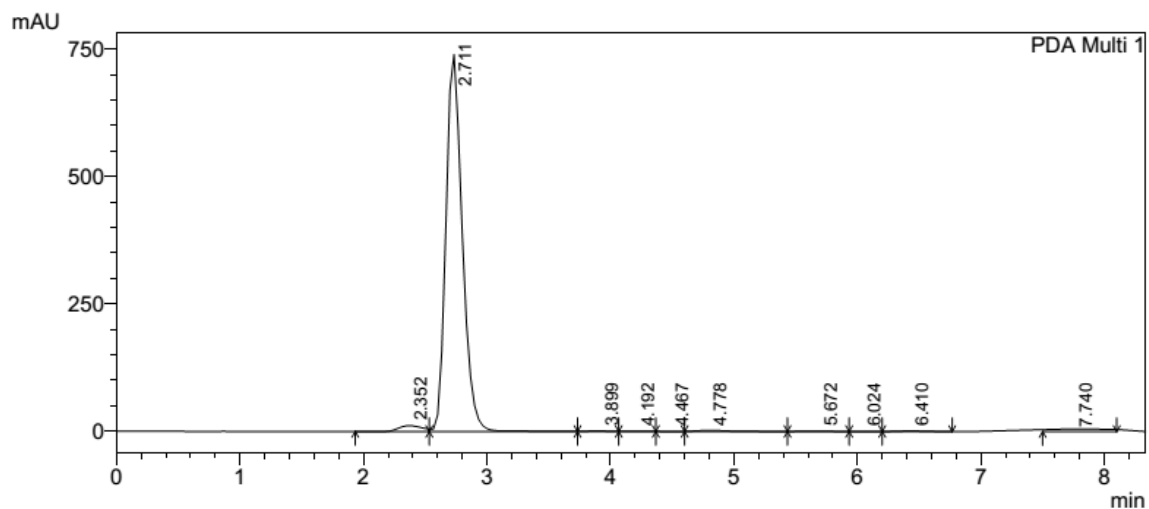

1 PDA Multi 1/254nm 4nm

PeakTable

PDA Ch1 254nm 4nm

| Peak# | Ret. Time | Area    | Height | Area %  | Height % |
|-------|-----------|---------|--------|---------|----------|
| 1     | 2.352     | 153924  | 11518  | 2.172   | 1.518    |
| 2     | 2.711     | 6838316 | 740524 | 96.490  | 97.592   |
| 3     | 3.899     | 15755   | 1416   | 0.222   | 0.187    |
| 4     | 4.192     | 4827    | 362    | 0.068   | 0.048    |
| 5     | 4.467     | 3319    | 295    | 0.047   | 0.039    |
| 6     | 4.778     | 40815   | 2411   | 0.576   | 0.318    |
| 7     | 5.672     | 9379    | 708    | 0.132   | 0.093    |
| 8     | 6.024     | 1571    | 152    | 0.022   | 0.020    |
| 9     | 6.410     | 17720   | 1332   | 0.250   | 0.176    |
| 10    | 7.740     | 1424    | 80     | 0.020   | 0.011    |
| Total |           | 7087052 | 758798 | 100.000 | 100.000  |

HPLC spectrum of **6n**

Event#: 1 MS(E+) Ret. Time : 0.587 -> 0.587 Scan#: 89 -> 89

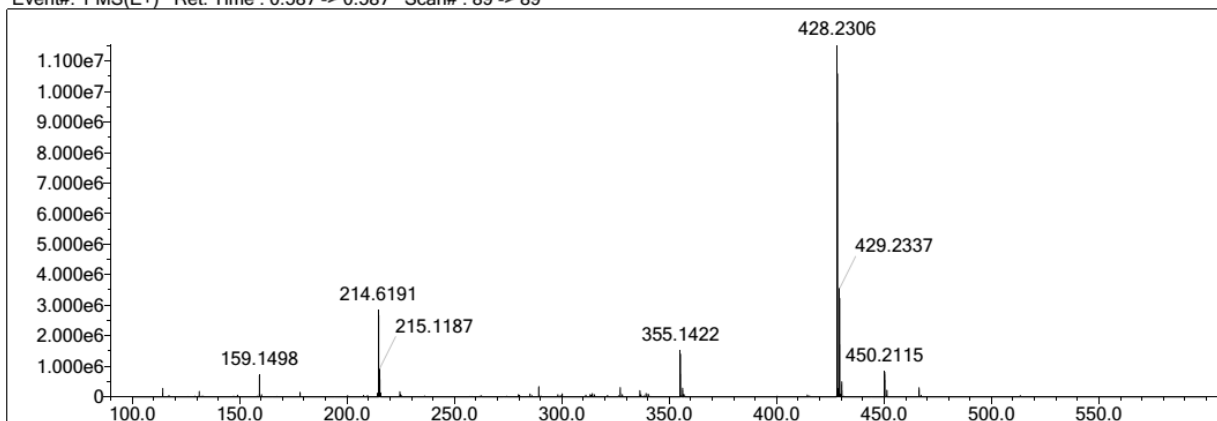

HRMS spectrum of **6n**



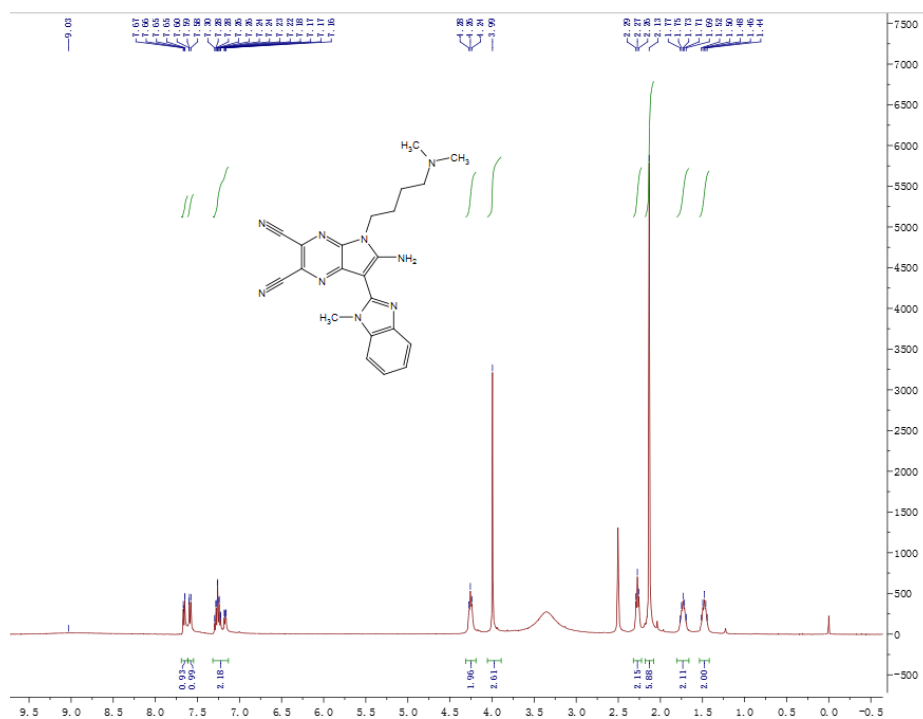

<sup>1</sup>H NMR (400 MHz, DMSO-*d*<sub>6</sub>) of **6t**

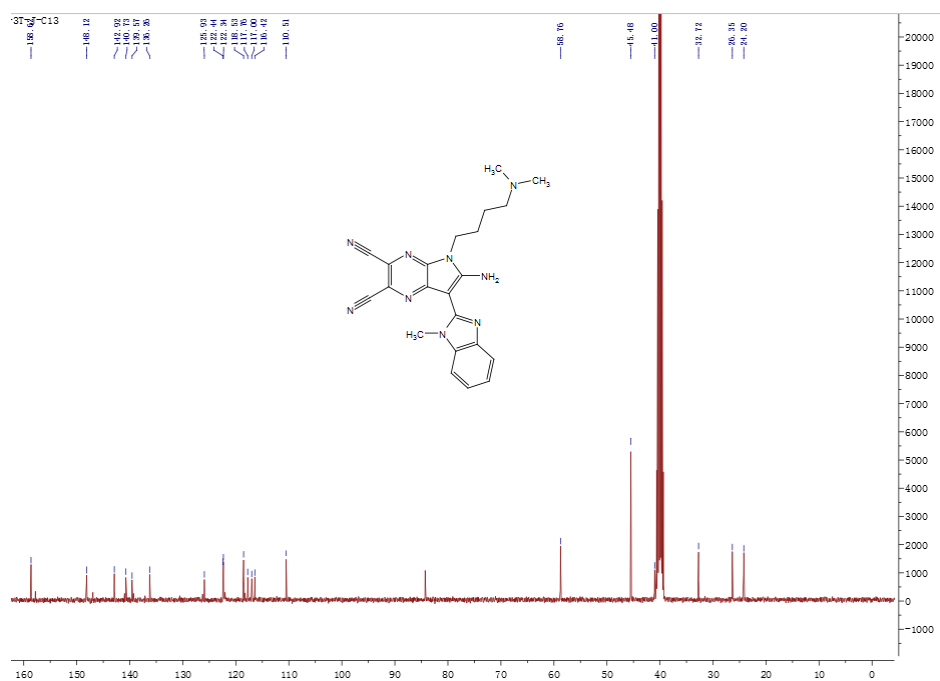

<sup>13</sup>C NMR (100 MHz, DMSO-*d*<sub>6</sub>) of **6t**

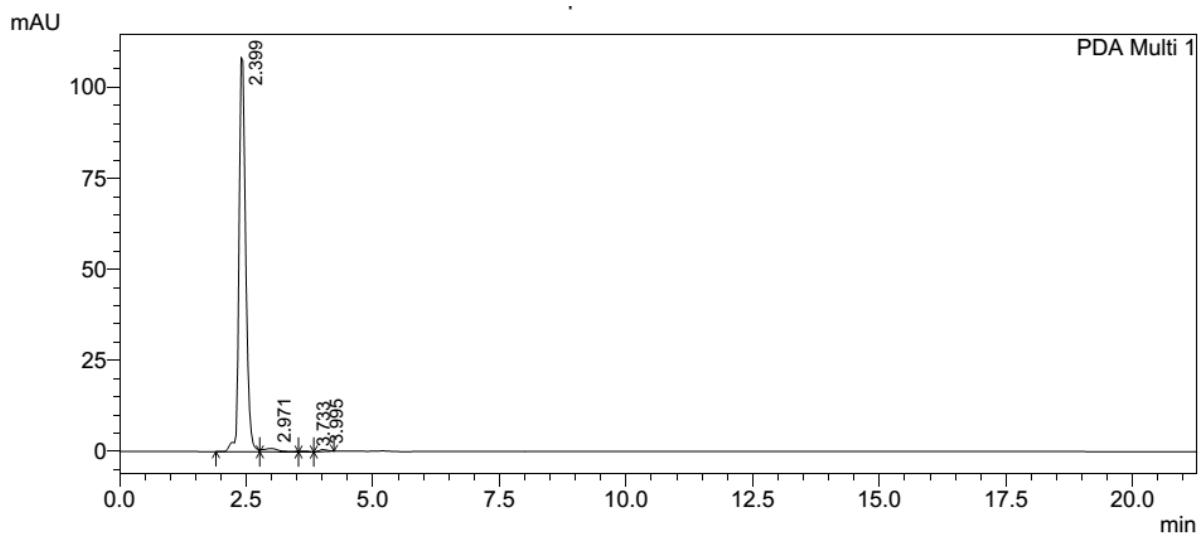

1 PDA Multi 1/254nm 4nm

PeakTable

PDA Ch1 254nm 4nm

| Peak# | Ret. Time | Area    | Height | Area %  | Height % |
|-------|-----------|---------|--------|---------|----------|
| 1     | 2.399     | 998863  | 108398 | 97.109  | 98.411   |
| 2     | 2.971     | 20982   | 925    | 2.040   | 0.840    |
| 3     | 3.733     | 2509    | 248    | 0.244   | 0.225    |
| 4     | 3.995     | 6249    | 577    | 0.608   | 0.524    |
| Total |           | 1028603 | 110149 | 100.000 | 100.000  |

HPLC spectrum of **6t**

Event#: 1 MS(E+) Ret. Time : 0.667 -> 0.667 Scan#: 101 -> 101

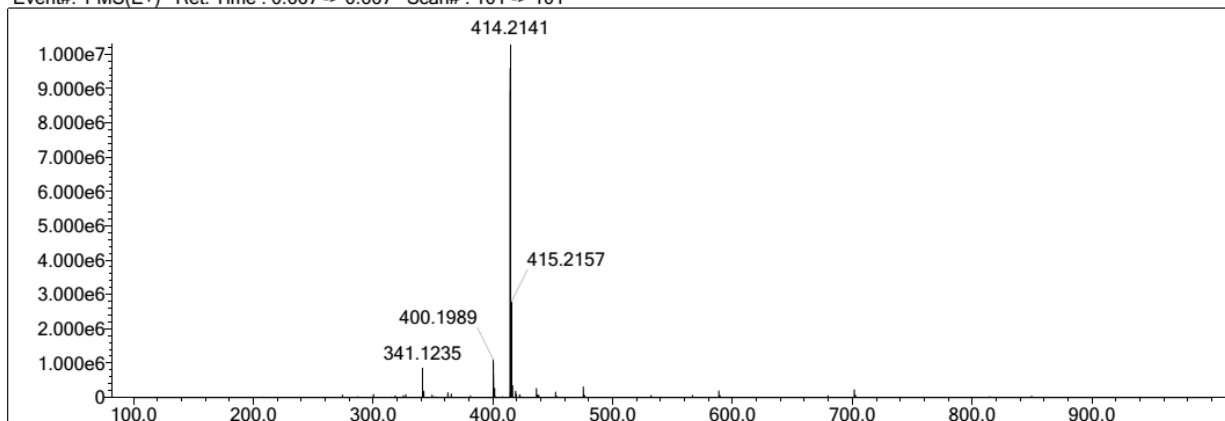

HRMS spectrum of **6t**

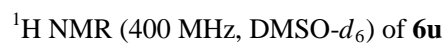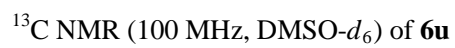

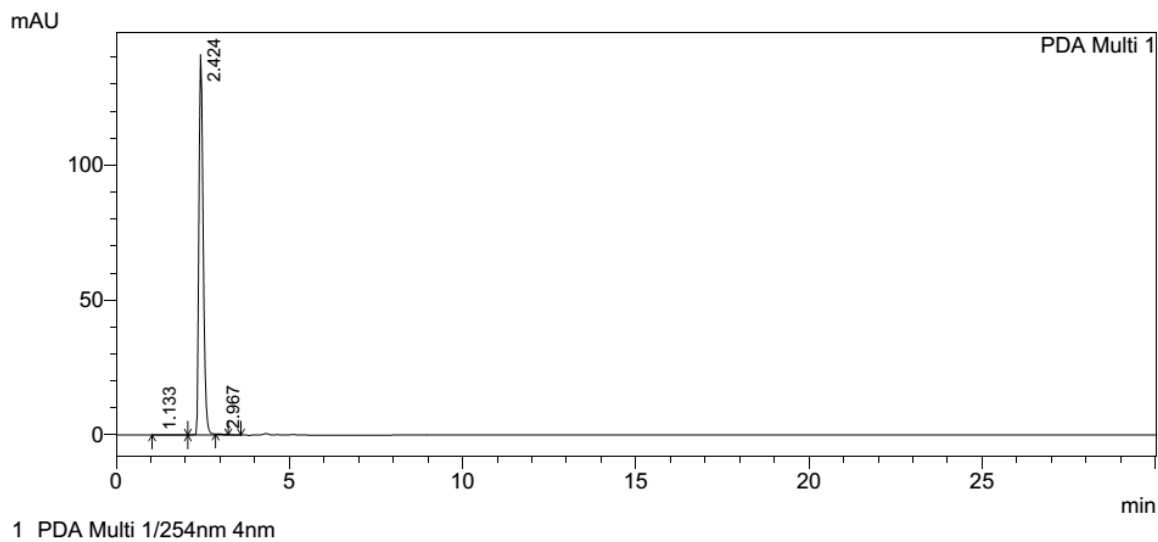

PeakTable

PDA Ch1 254nm 4nm

| Peak# | Ret. Time | Area    | Height | Area %  | Height % |
|-------|-----------|---------|--------|---------|----------|
| 1     | 1.133     | 1063    | 20     | 0.087   | 0.014    |
| 2     | 2.424     | 1216952 | 141127 | 99.815  | 99.891   |
| 3     | 2.967     | 1199    | 134    | 0.098   | 0.095    |
| Total |           | 1219213 | 141282 | 100.000 | 100.000  |

HPLC spectrum of **6u**

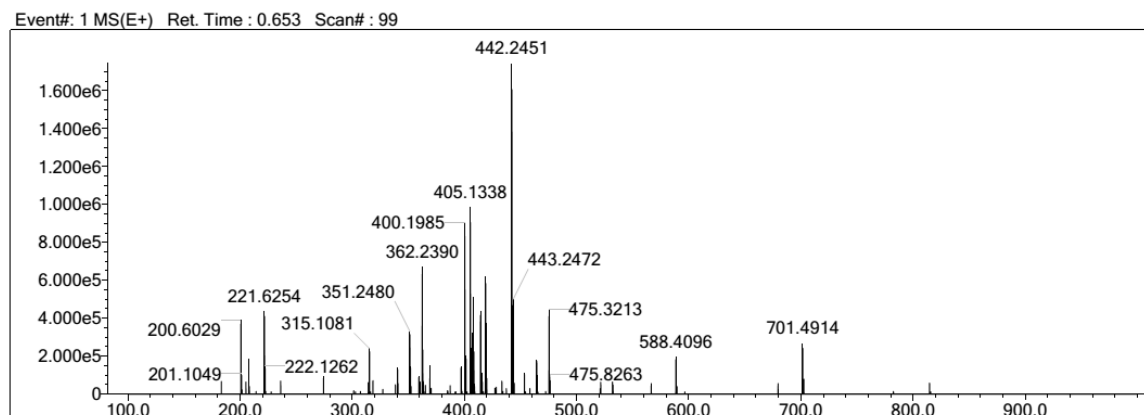

HRMS spectrum of **6u**

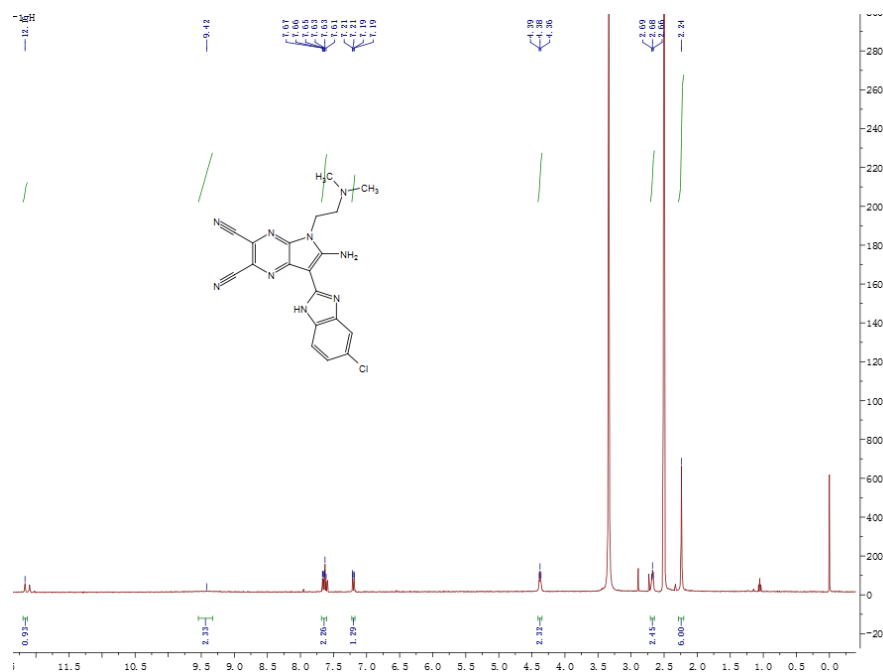

<sup>1</sup>H NMR (400 MHz, DMSO-*d*<sub>6</sub>) of **7c**

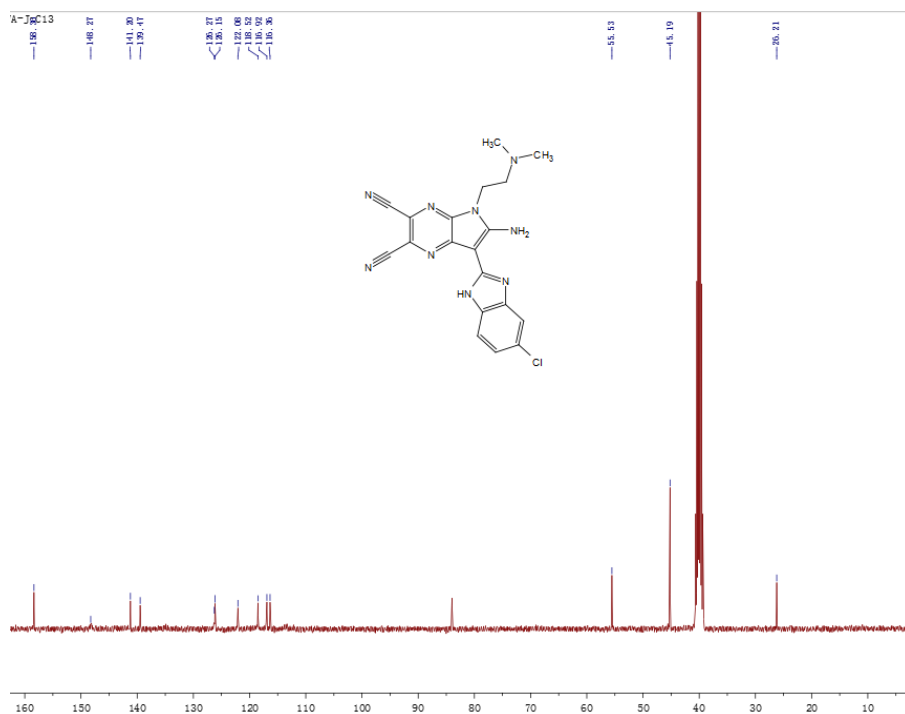

<sup>13</sup>C NMR (100 MHz, DMSO-*d*<sub>6</sub>) of **7c**

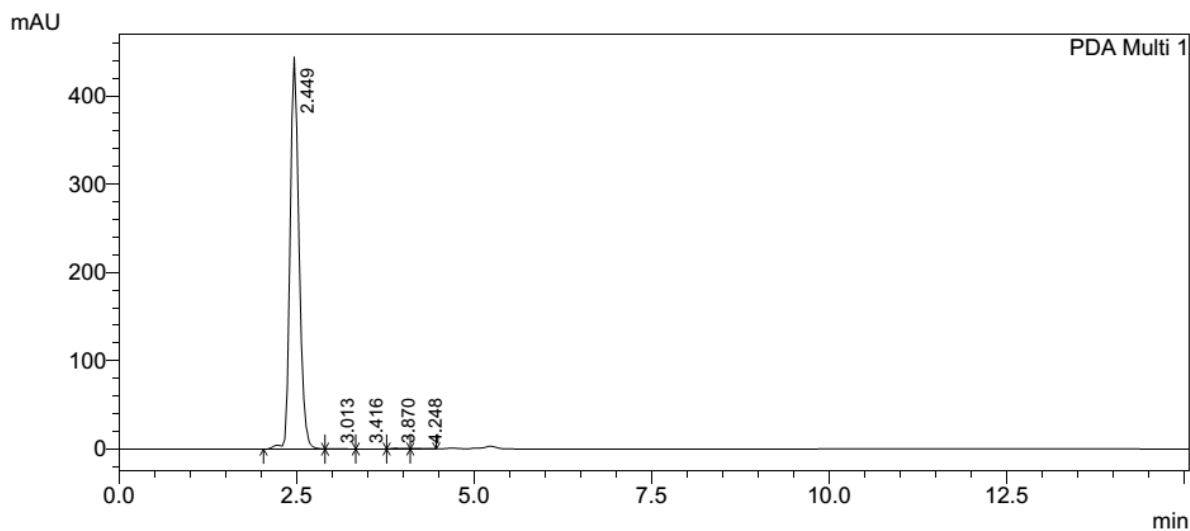

PeakTable

| Peak# | Ret. Time | Area    | Height | Area %  | Height % |
|-------|-----------|---------|--------|---------|----------|
| 1     | 2.449     | 3890856 | 444573 | 99.214  | 99.456   |
| 2     | 3.013     | 9613    | 630    | 0.245   | 0.141    |
| 3     | 3.416     | 4158    | 322    | 0.106   | 0.072    |
| 4     | 3.870     | 10086   | 952    | 0.257   | 0.213    |
| 5     | 4.248     | 6981    | 529    | 0.178   | 0.118    |
| Total |           | 3921694 | 447005 | 100.000 | 100.000  |

HPLC spectrum of **7c**

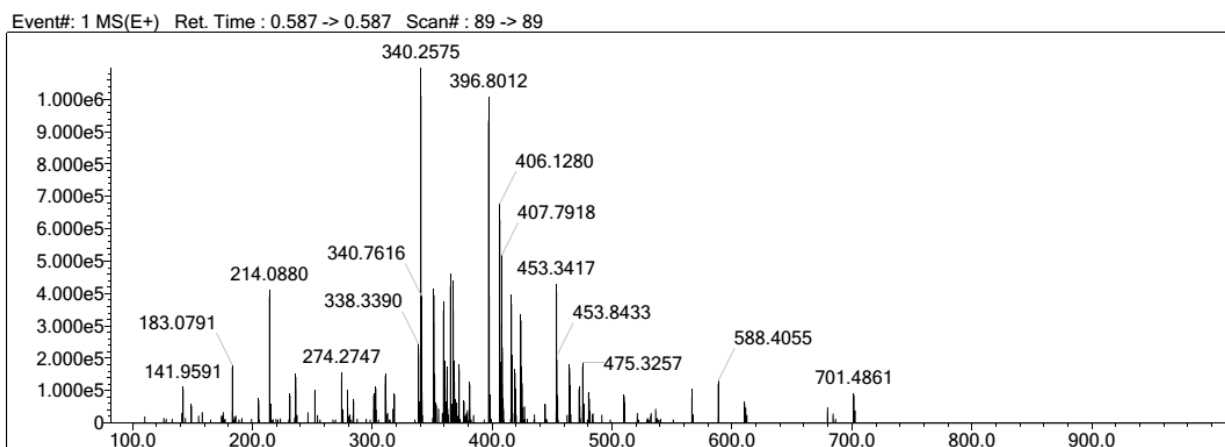

HRMS spectrum of **7c**

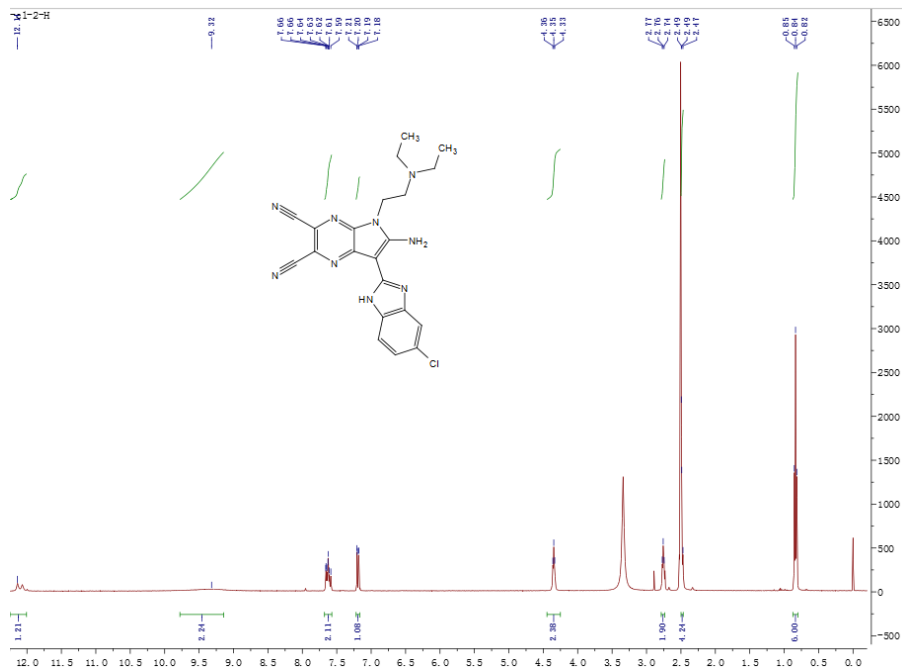

<sup>1</sup>H NMR (400 MHz, DMSO-*d*<sub>6</sub>) of **7d**

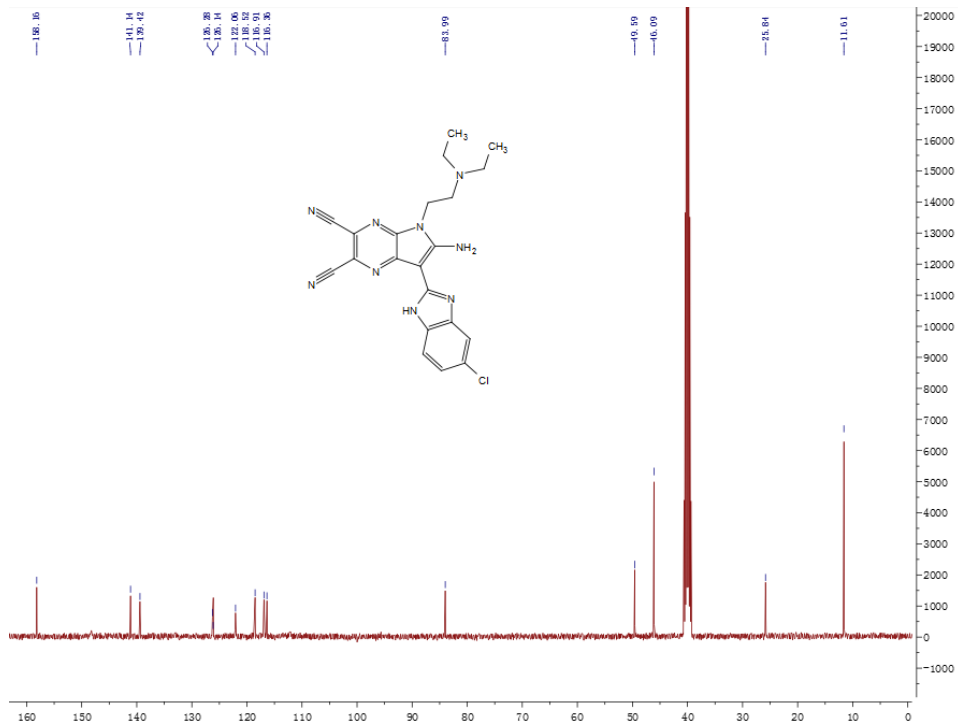

<sup>13</sup>C NMR (100 MHz, DMSO-*d*<sub>6</sub>) of **7d**

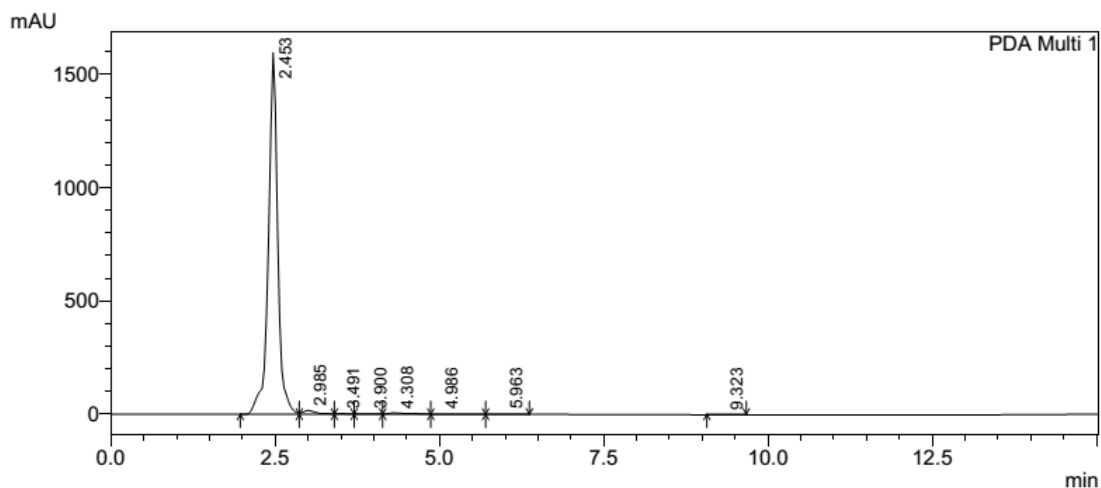

1 PDA Multi 1/254nm 4nm

PeakTable

PDA Ch1 254nm 4nm

| Peak# | Ret. Time | Area     | Height  | Area %  | Height % |
|-------|-----------|----------|---------|---------|----------|
| 1     | 2.453     | 15726222 | 1598355 | 97.058  | 98.155   |
| 2     | 2.985     | 228710   | 16469   | 1.412   | 1.011    |
| 3     | 3.491     | 33841    | 3525    | 0.209   | 0.216    |
| 4     | 3.900     | 48981    | 2063    | 0.302   | 0.127    |
| 5     | 4.308     | 129187   | 6207    | 0.797   | 0.381    |
| 6     | 4.986     | 28626    | 1310    | 0.177   | 0.080    |
| 7     | 5.963     | 4118     | 265     | 0.025   | 0.016    |
| 8     | 9.323     | 3205     | 203     | 0.020   | 0.012    |
| Total |           | 16202891 | 1628398 | 100.000 | 100.000  |

HPLC spectrum of **7d**

Event#: 2 MS(E-) Ret. Time : 0.667 -> 0.667 Scan#: 102 -> 102

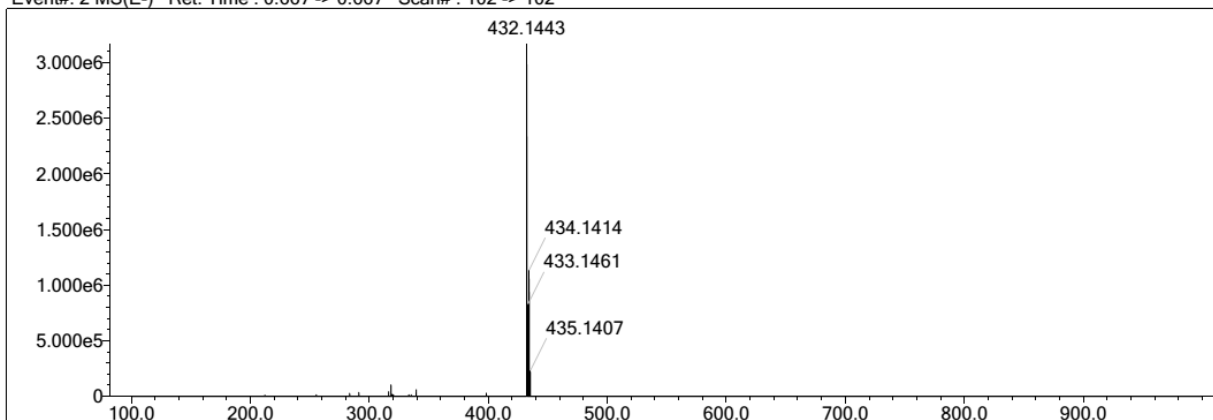

HRMS spectrum of **7d**



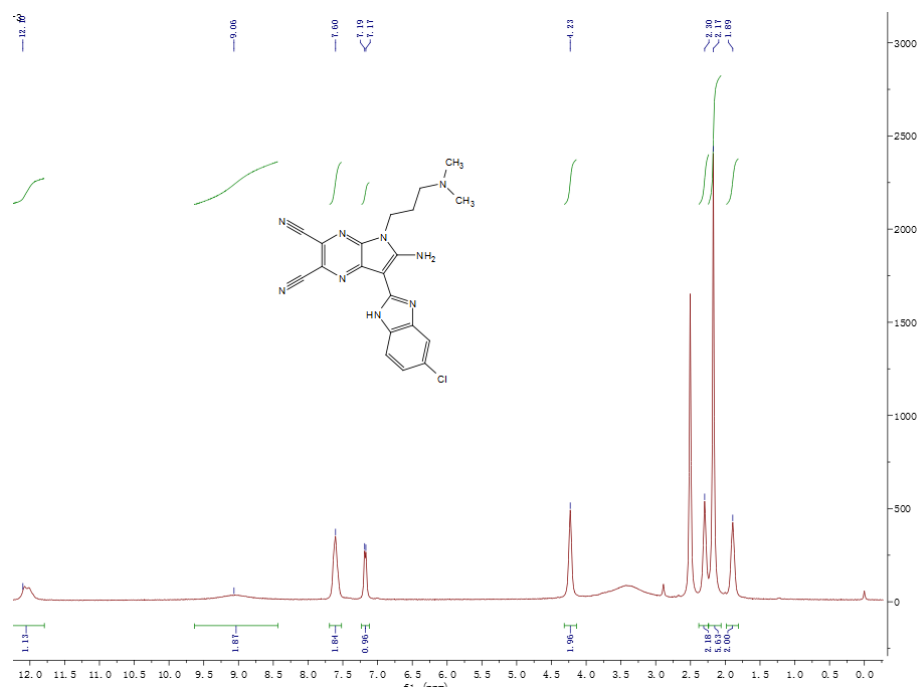

<sup>1</sup>H NMR (400 MHz, DMSO-*d*<sub>6</sub>) of **7m**

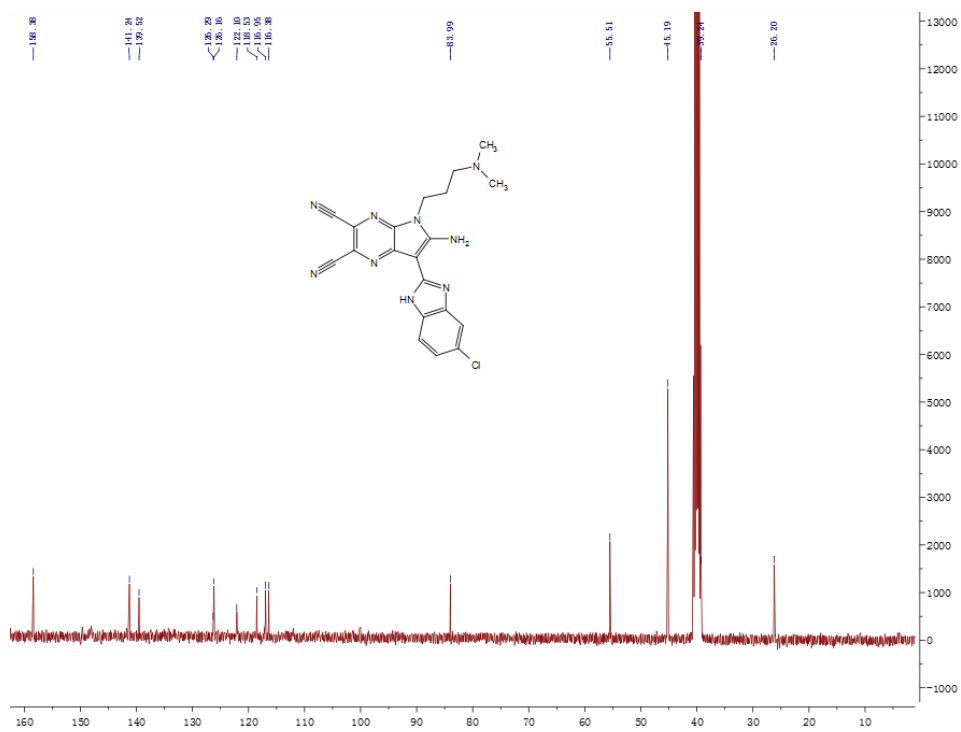

<sup>13</sup>C NMR (100 MHz, DMSO-*d*<sub>6</sub>) of **7m**

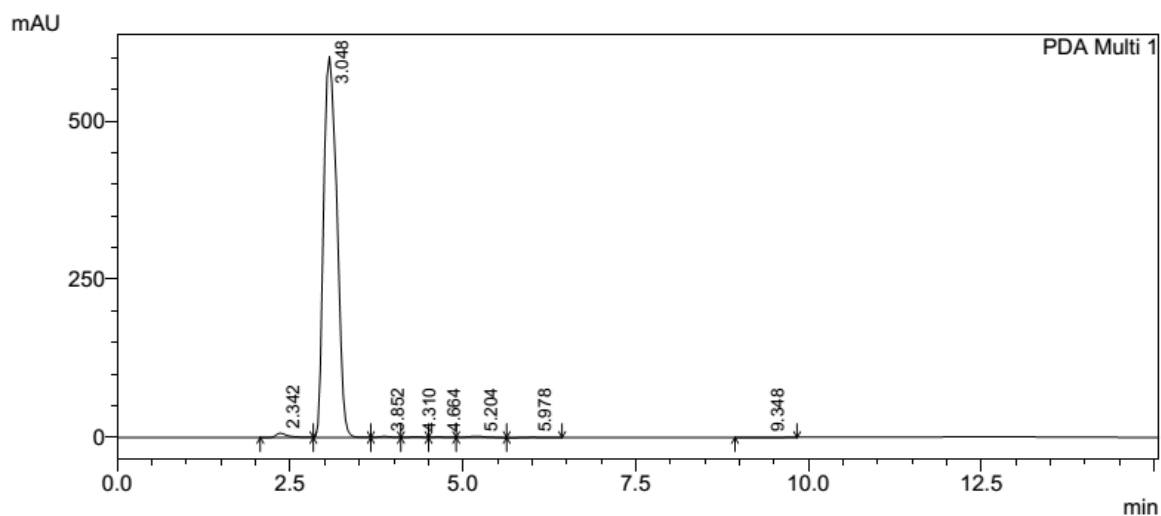

PeakTable

| PDA Ch1 254nm 4nm |           |         |        |         |          |
|-------------------|-----------|---------|--------|---------|----------|
| Peak#             | Ret. Time | Area    | Height | Area %  | Height % |
| 1                 | 2.342     | 87885   | 6996   | 1.068   | 1.134    |
| 2                 | 3.048     | 8028562 | 602690 | 97.587  | 97.734   |
| 3                 | 3.852     | 24258   | 1768   | 0.295   | 0.287    |
| 4                 | 4.310     | 21150   | 1427   | 0.257   | 0.231    |
| 5                 | 4.664     | 17470   | 1100   | 0.212   | 0.178    |
| 6                 | 5.204     | 37044   | 2044   | 0.450   | 0.332    |
| 7                 | 5.978     | 4770    | 272    | 0.058   | 0.044    |
| 8                 | 9.348     | 5919    | 367    | 0.072   | 0.060    |
| Total             |           | 8227057 | 616665 | 100.000 | 100.000  |

HPLC spectrum of **7m**

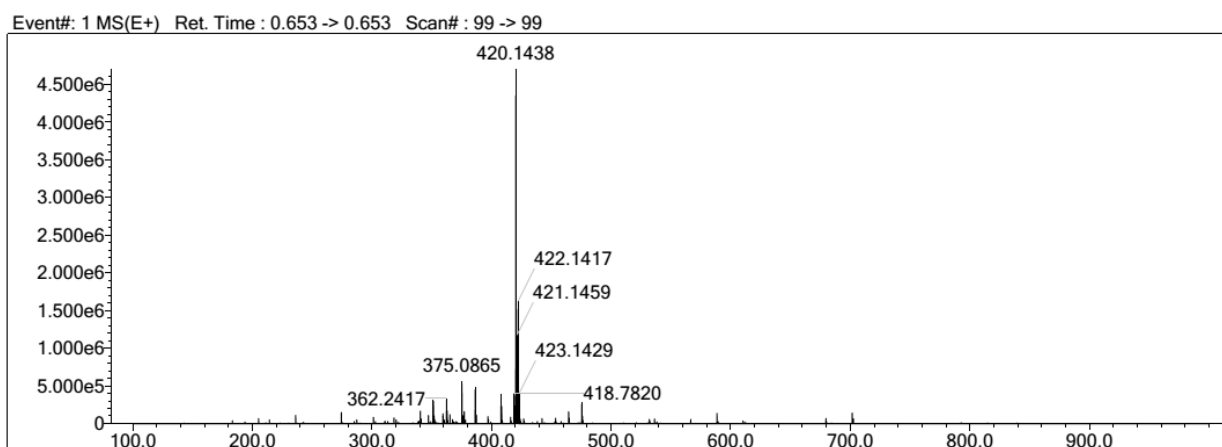

HRMS spectrum of **7m**

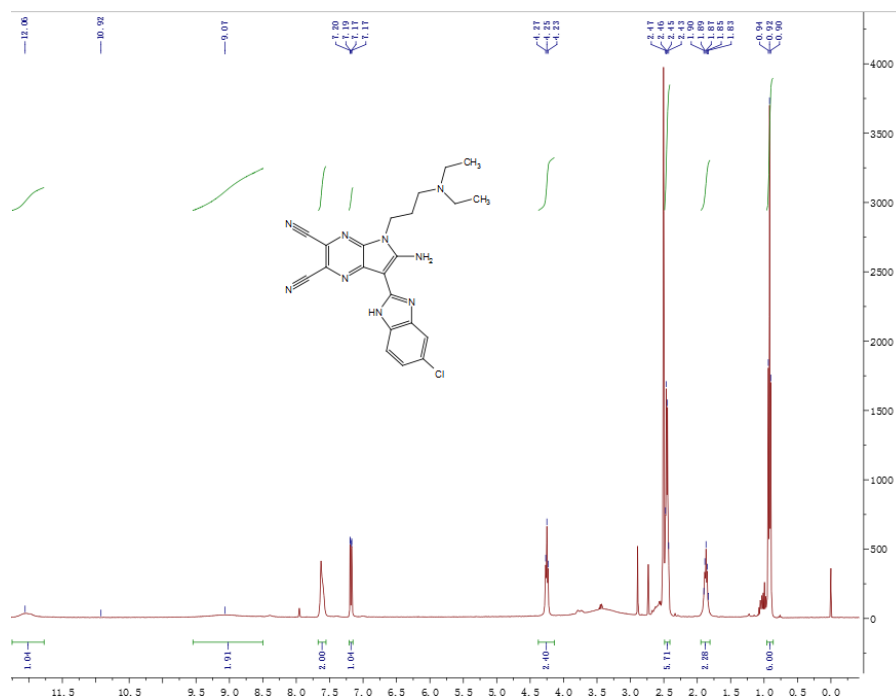

<sup>1</sup>H NMR (400 MHz, DMSO-*d*<sub>6</sub>) of 7n

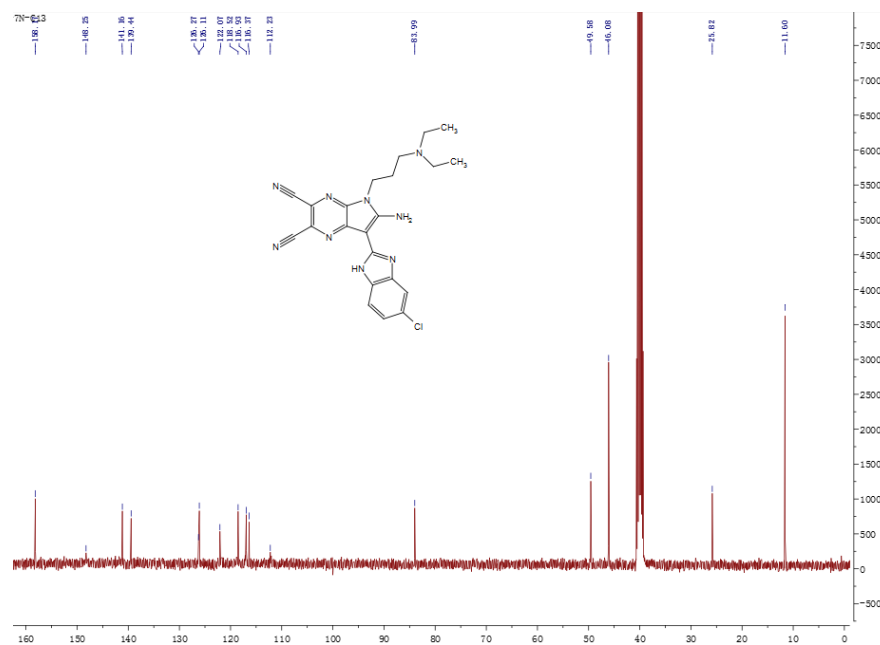

<sup>13</sup>C NMR (100 MHz, DMSO-*d*<sub>6</sub>) of 7n

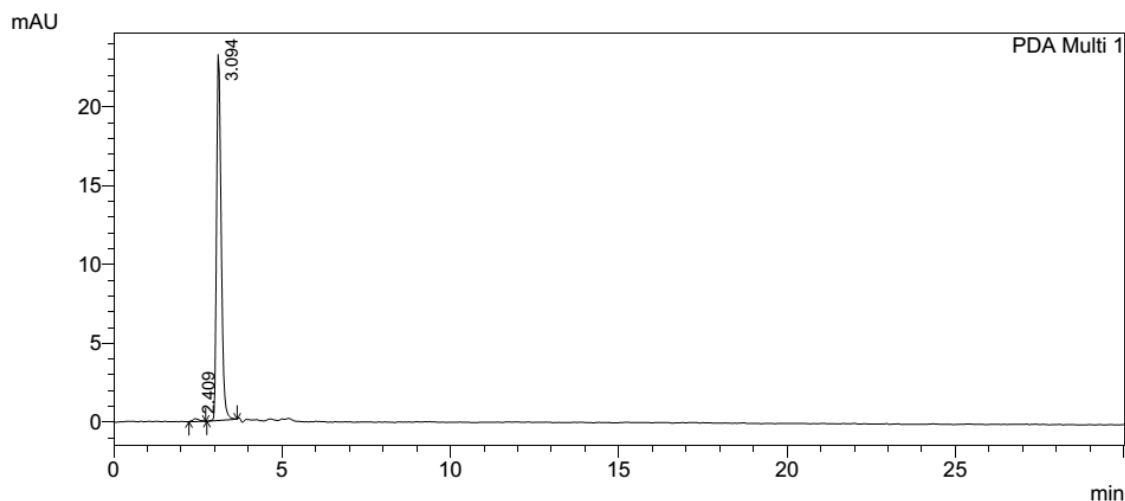

PeakTable

| Peak# | Ret. Time | Area   | Height | Area %  | Height % |
|-------|-----------|--------|--------|---------|----------|
| 1     | 2.409     | 2480   | 193    | 1.096   | 0.823    |
| 2     | 3.094     | 223739 | 23234  | 98.904  | 99.177   |
| Total |           | 226220 | 23427  | 100.000 | 100.000  |

HPLC spectrum of **7n**

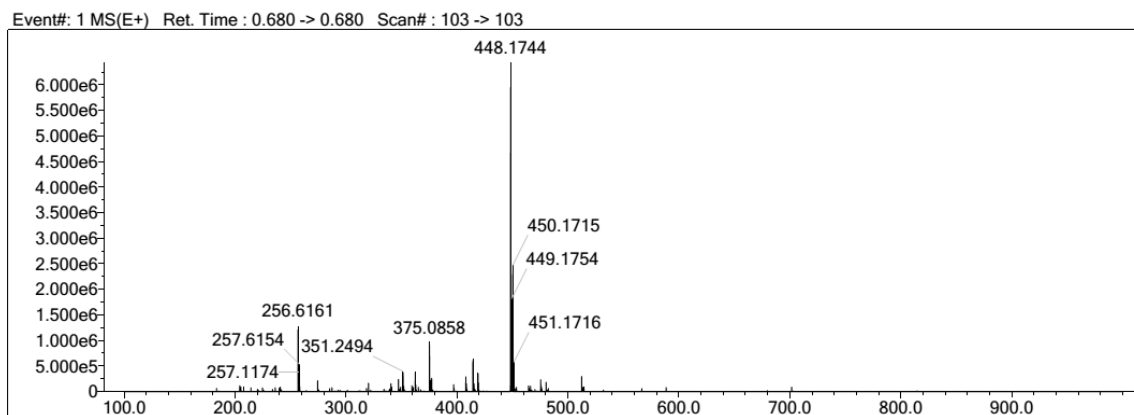

HRMS spectrum of **7n**

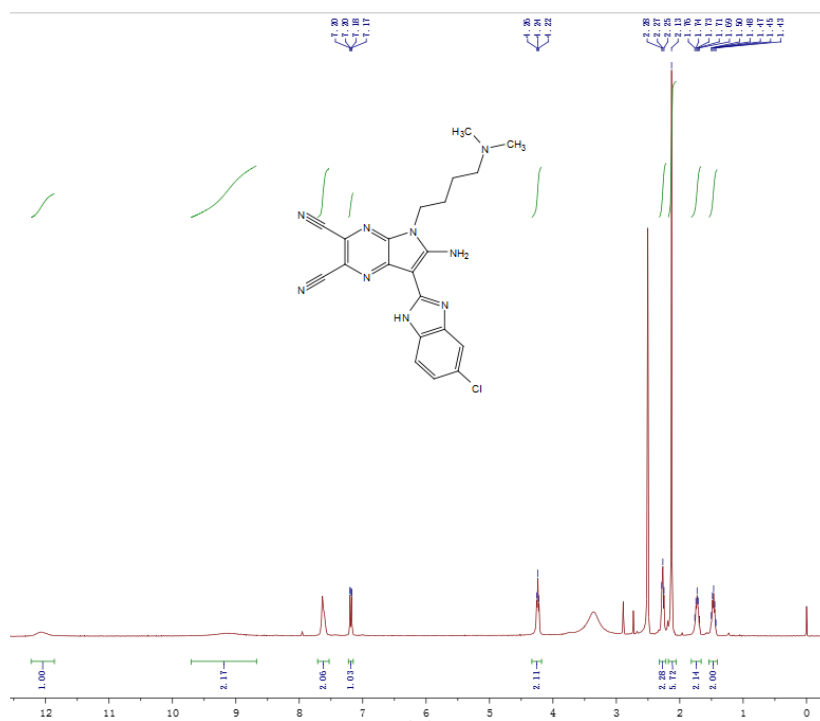

<sup>1</sup>H NMR (400 MHz, DMSO-*d*<sub>6</sub>) of **7t**

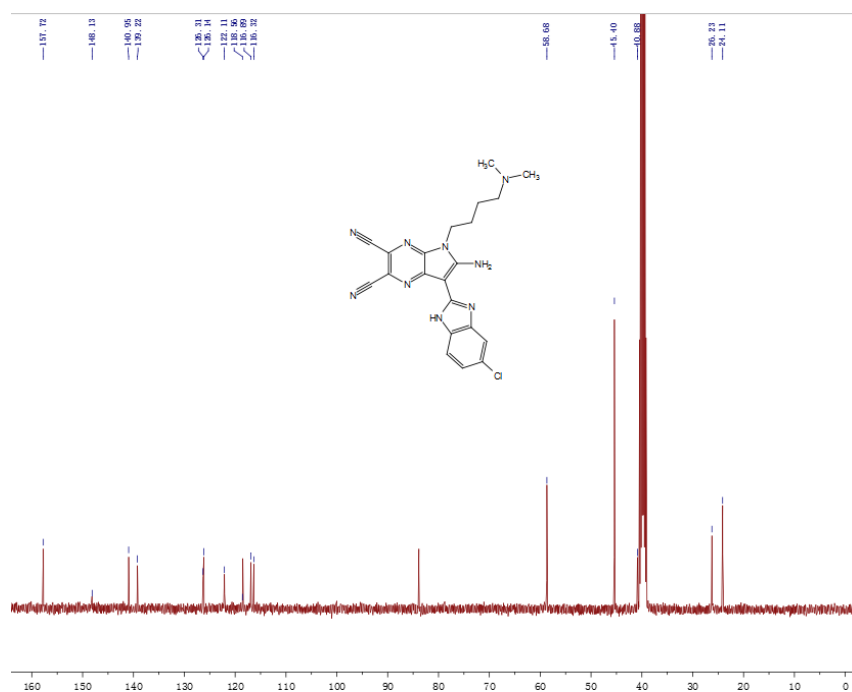

<sup>13</sup>C NMR (100 MHz, DMSO-*d*<sub>6</sub>) of **7t**

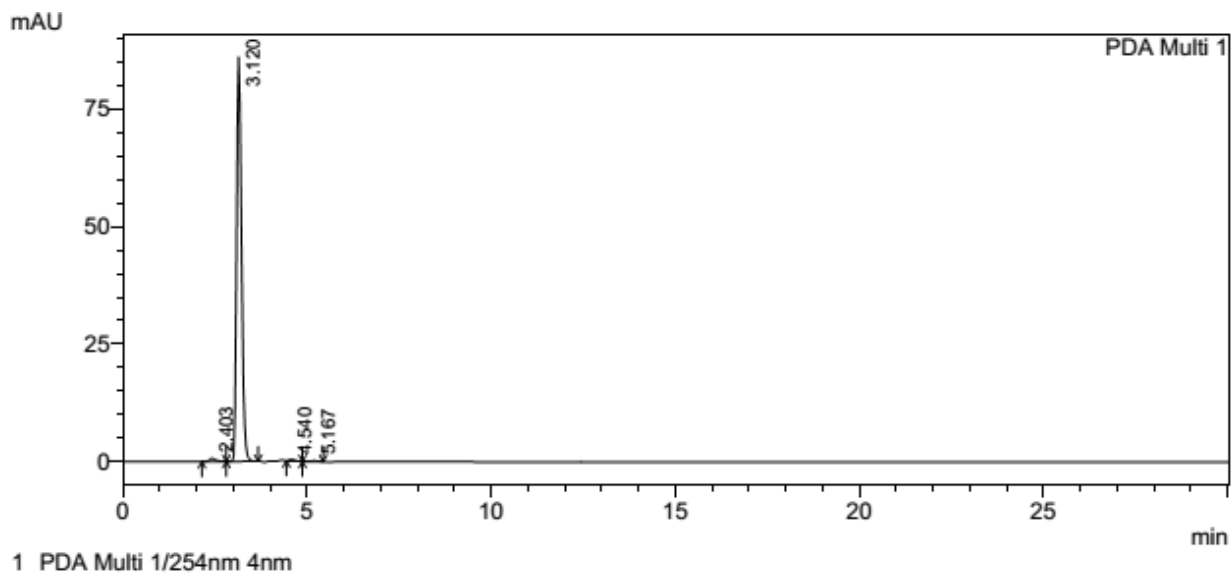

PeakTable

PDA Ch1 254nm 4nm

| Peak# | Ret. Time | Area   | Height | Area %  | Height % |
|-------|-----------|--------|--------|---------|----------|
| 1     | 2.403     | 9695   | 734    | 1.182   | 0.840    |
| 2     | 3.120     | 804021 | 86114  | 97.992  | 98.557   |
| 3     | 4.540     | 3854   | 349    | 0.470   | 0.399    |
| 4     | 5.167     | 2923   | 178    | 0.356   | 0.204    |
| Total |           | 820493 | 87375  | 100.000 | 100.000  |

HPLC spectrum of **7t**

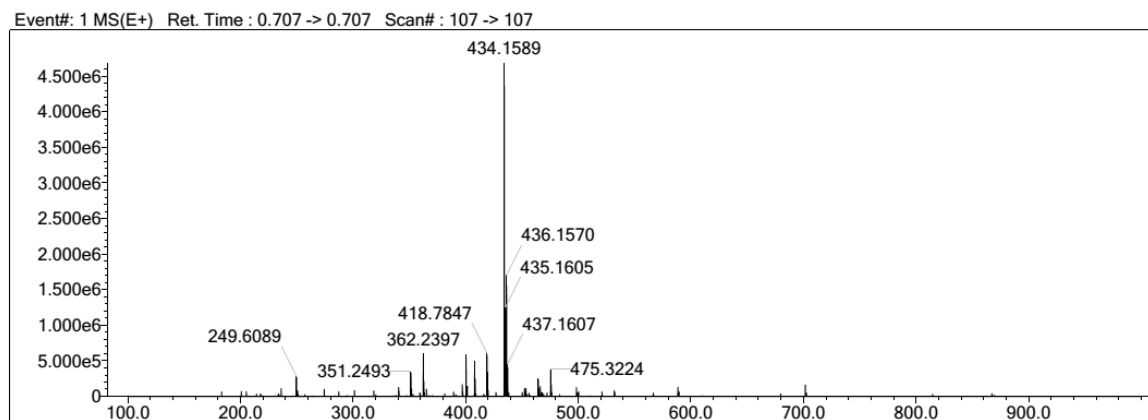

HRMS spectrum of **7t**

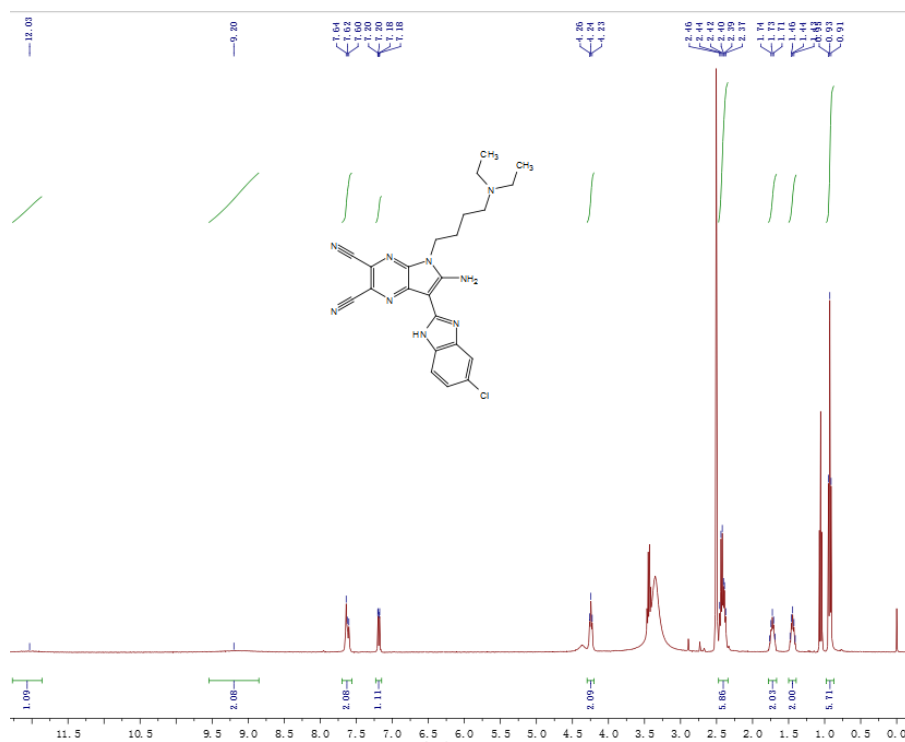

<sup>1</sup>H NMR (400 MHz, DMSO-*d*<sub>6</sub>) of **7u**

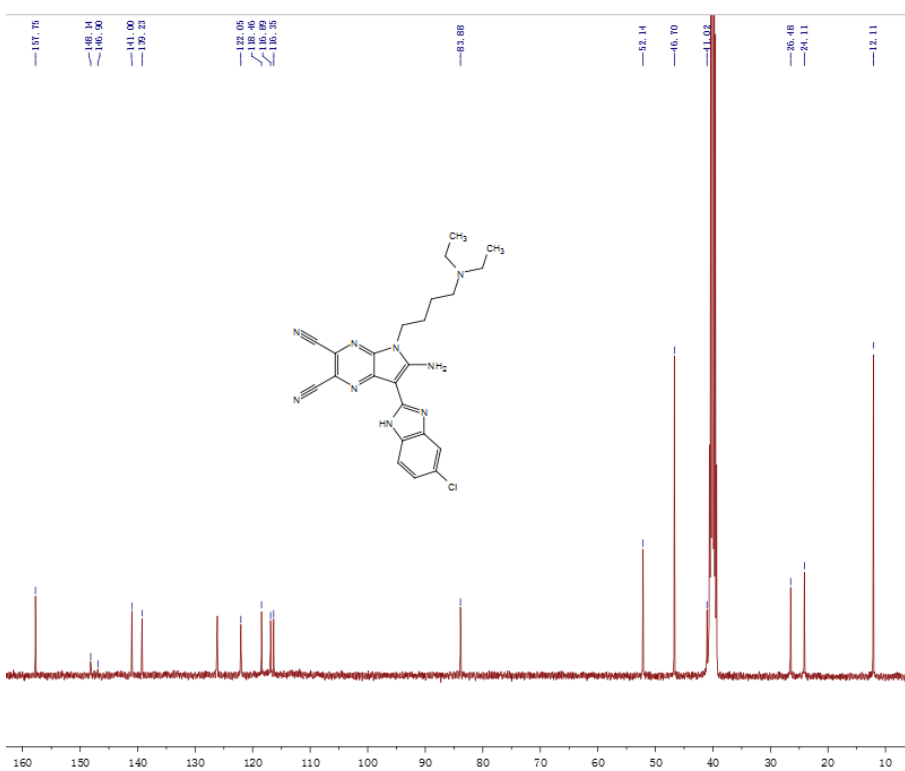

<sup>13</sup>C NMR (100 MHz, DMSO-*d*<sub>6</sub>) of **7u**

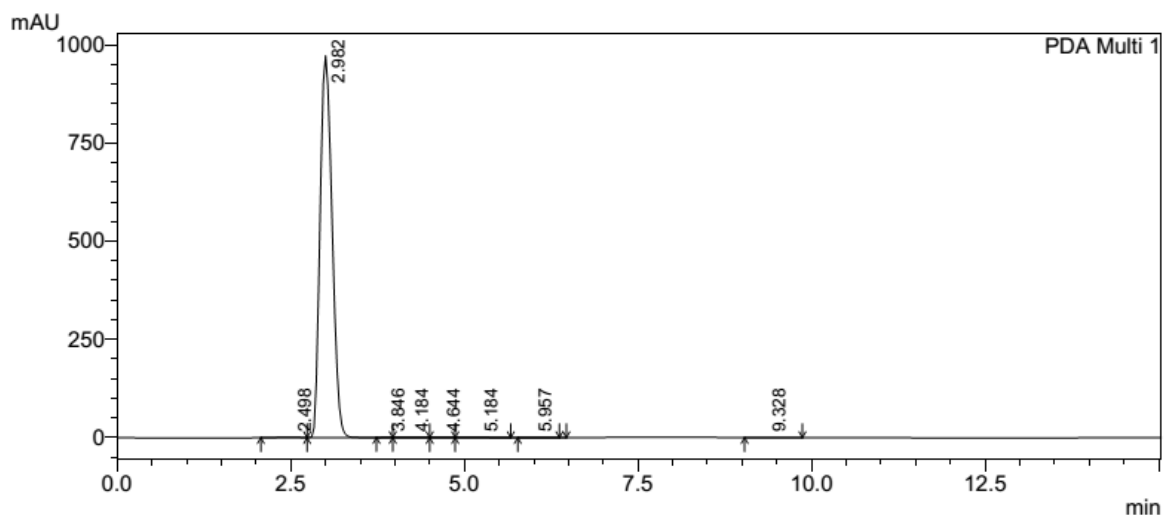

1 PDA Multi 1/254nm 4nm

PeakTable

PDA Ch1 254nm 4nm

| Peak# | Ret. Time | Area     | Height | Area %  | Height % |
|-------|-----------|----------|--------|---------|----------|
| 1     | 2.498     | 29509    | 1525   | 0.249   | 0.156    |
| 2     | 2.982     | 11742145 | 973187 | 99.017  | 99.282   |
| 3     | 3.846     | 9695     | 1053   | 0.082   | 0.107    |
| 4     | 4.184     | 19081    | 733    | 0.161   | 0.075    |
| 5     | 4.644     | 12833    | 926    | 0.108   | 0.094    |
| 6     | 5.184     | 28148    | 1558   | 0.237   | 0.159    |
| 7     | 5.957     | 8240     | 660    | 0.069   | 0.067    |
| 8     | 9.328     | 9055     | 582    | 0.076   | 0.059    |
| Total |           | 11858706 | 980224 | 100.000 | 100.000  |

HPLC spectrum of **7u**

Event#: 1 MS(E+) Ret. Time : 0.707 -> 0.707 Scan#: 107 -> 107

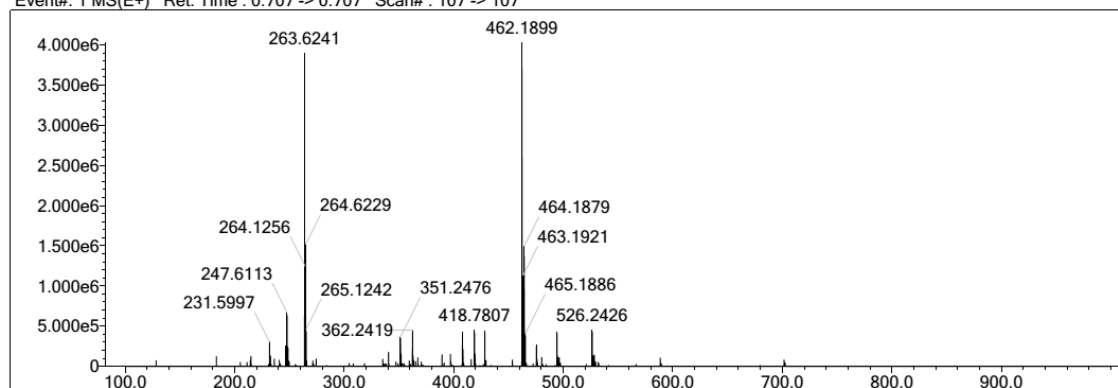

HRMS spectrum of **7u**



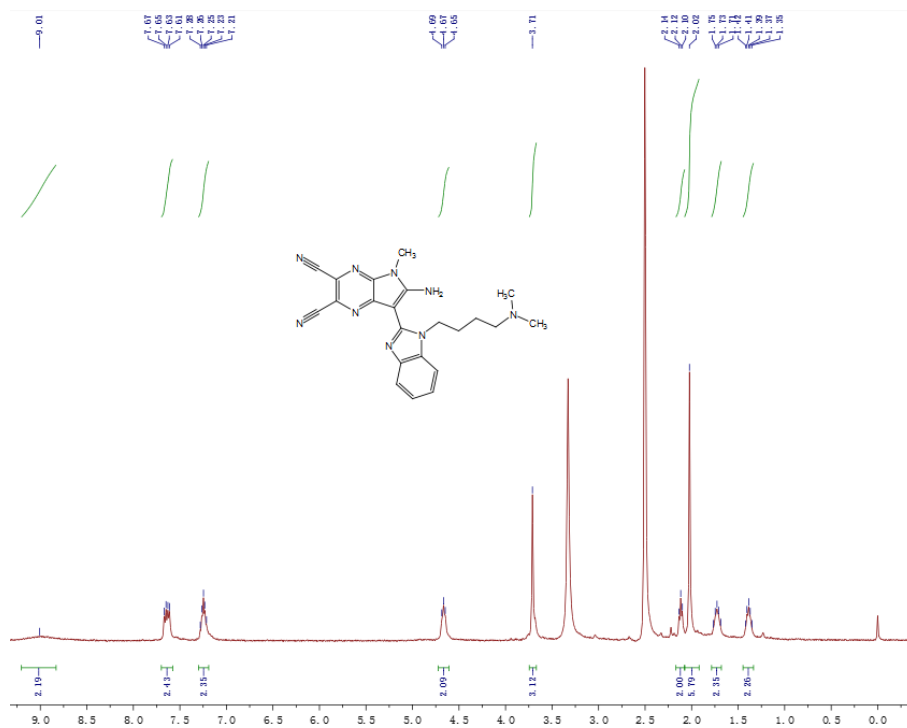

<sup>1</sup>H NMR (400 MHz, DMSO-*d*<sub>6</sub>) of **8t**

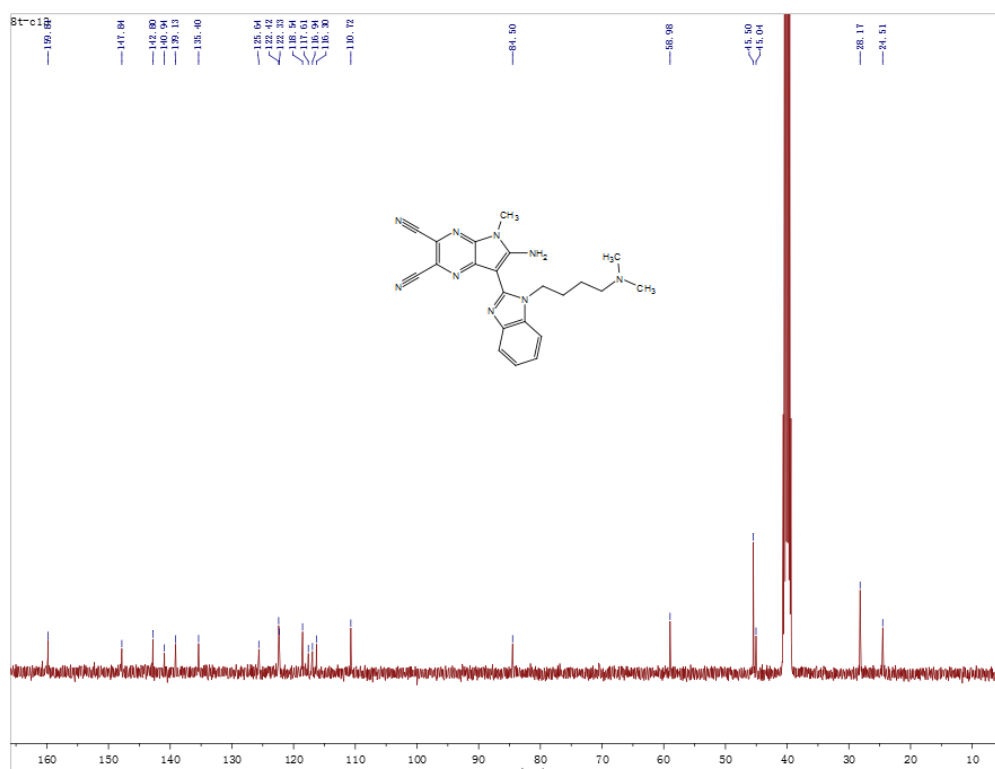

<sup>13</sup>C NMR (100 MHz, DMSO-*d*<sub>6</sub>) of **8t**

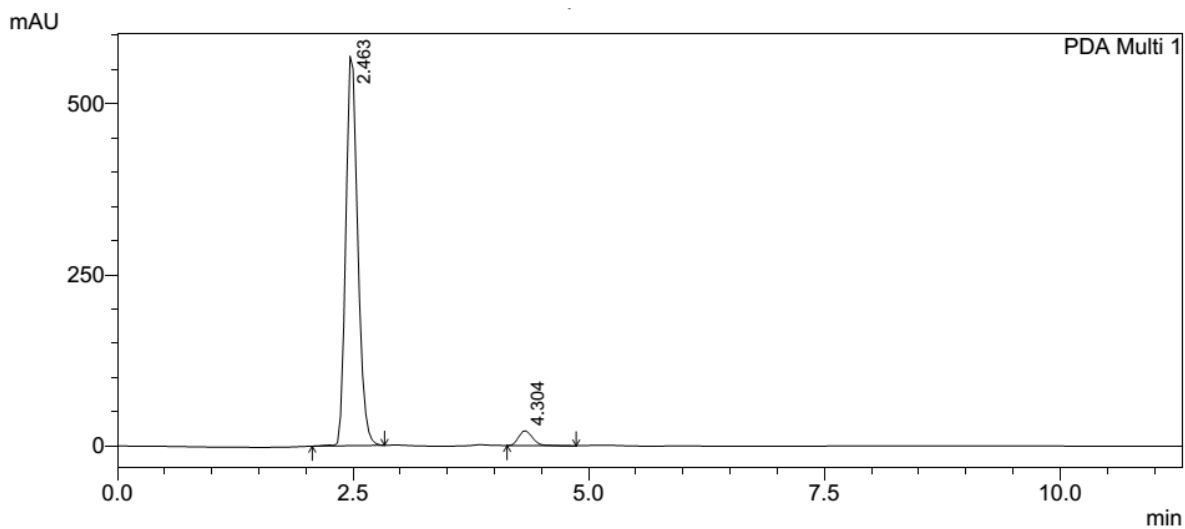

1 PDA Multi 1/254nm 4nm

PeakTable

PDA Ch1 254nm 4nm

| Peak# | Ret. Time | Area    | Height | Area %  | Height % |
|-------|-----------|---------|--------|---------|----------|
| 1     | 2.463     | 5034926 | 569781 | 95.688  | 96.370   |
| 2     | 4.304     | 226885  | 21461  | 4.312   | 3.630    |
| Total |           | 5261811 | 591242 | 100.000 | 100.000  |

HPLC spectrum of **8t**

Event#: 1 MS(E+) Ret. Time : 0.640 -> 0.640 Scan#: 97 -> 97

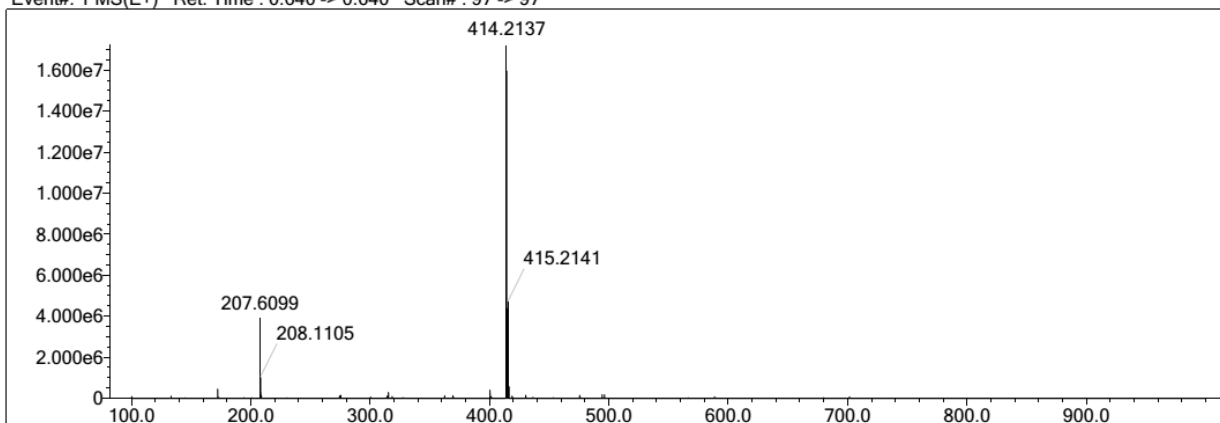

HRMS spectrum of **8t**

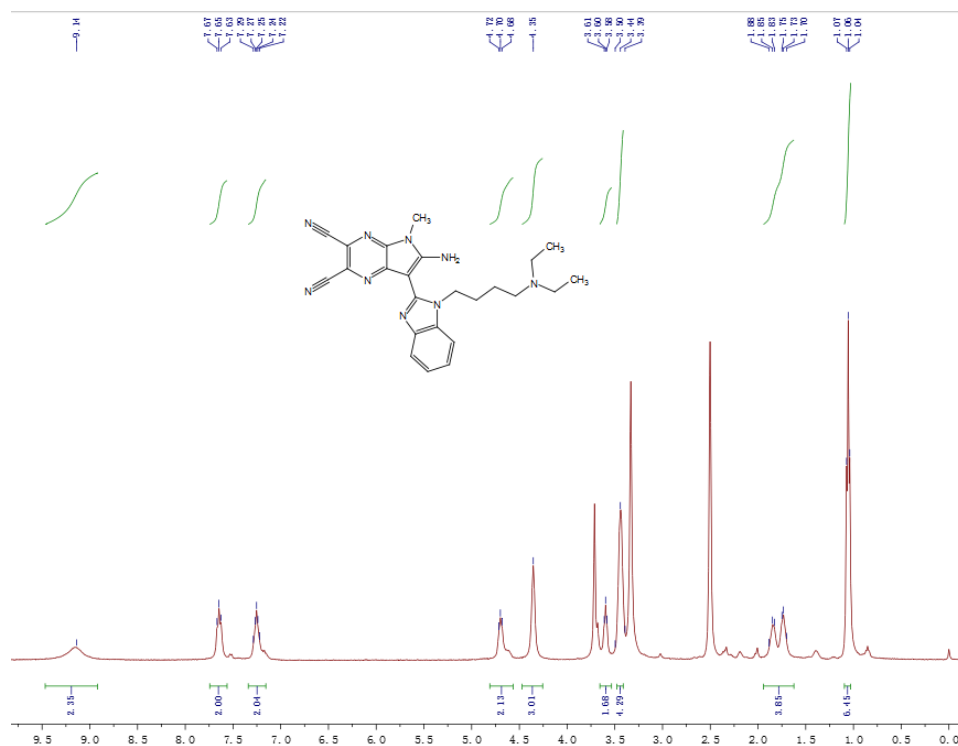

<sup>1</sup>H NMR (400 MHz, DMSO-d<sub>6</sub>) of **8u**

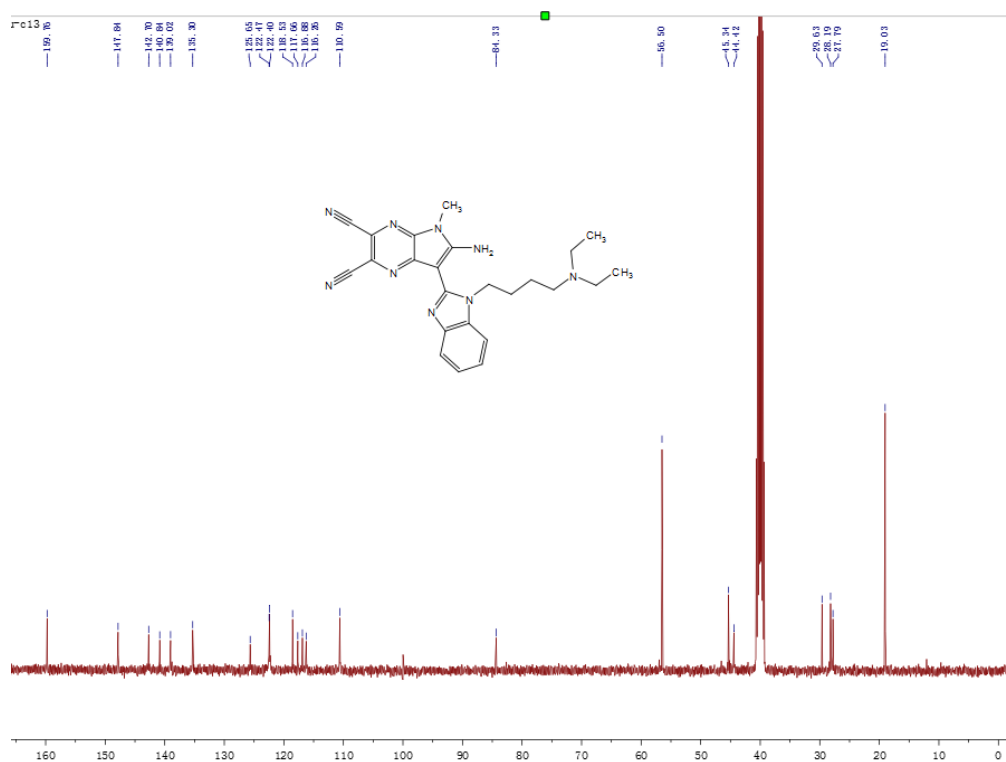

<sup>13</sup>C NMR (100 MHz, DMSO-d<sub>6</sub>) of **8u**

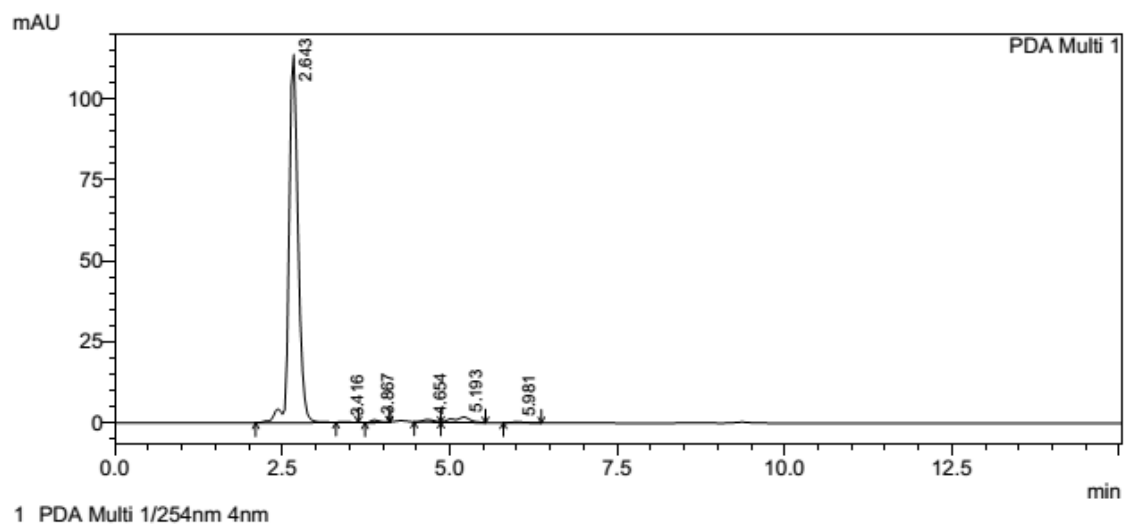

PeakTable

| Peak# | Ret. Time | Area    | Height | Area %  | Height % |
|-------|-----------|---------|--------|---------|----------|
| 1     | 2.643     | 1068728 | 113793 | 95.374  | 96.753   |
| 2     | 3.416     | 1679    | 198    | 0.150   | 0.168    |
| 3     | 3.867     | 7330    | 867    | 0.654   | 0.737    |
| 4     | 4.654     | 9359    | 751    | 0.835   | 0.639    |
| 5     | 5.193     | 28940   | 1675   | 2.583   | 1.424    |
| 6     | 5.981     | 4526    | 328    | 0.404   | 0.279    |
| Total |           | 1120562 | 117612 | 100.000 | 100.000  |

HPLC spectrum of **8u**

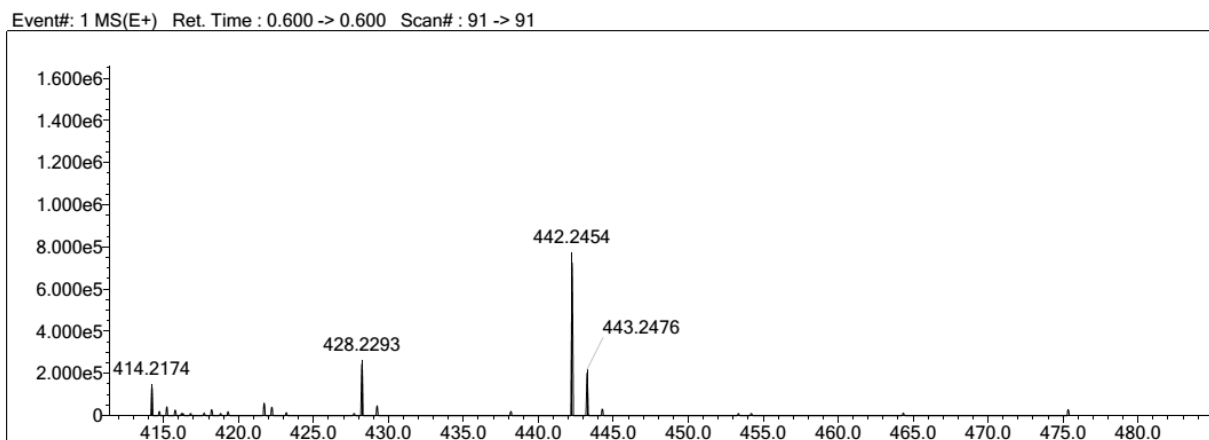

HRMS spectrum of **8u**

## References

- [1] Liu, L. DNA toisomerase poisons as antitumor drugs. *Annu. Rev. Biochem.* **1989**, 58, 351–375.
- [2] Zhuo, S. T.; Li, C. Y.; Hu, M. H.; Chen, S. B.; Yao, P. F.; Huang, S. L.; Ou, T. M.; Tan, J. H.; An, L. K.; Li, D.; Gu, L. Q.; Huang, Z. S. Synthesis and biological evaluation of benzo[a]-phenazine derivatives as a dual inhibitor of topoisomerase I and II. *Org. Biomol. Chem.* **2013**, 11, 3989–4005
- [3] Sheng, C. Q.; Miao, Z.Y.; Zhang, W. N. New strategies in the discovery of novel non-camptothecin topoisomerase I Inhibitors. *Curr. Med. Chem.* **2011**, 18, 4389–4409.
- [4] Yalowich, J. C.; Wu, X.; Zhang, R.; Kanagasabai, R.; Hornbaker, M.; Hasinoff, B. B. The anticancer thiosemicarbazones Dp44mT and triapine lack inhibitory effects as catalytic inhibitors or poisons of DNA topoisomerase II $\alpha$ . *Biochem. Pharmacol.* **2012**, 84, 52–58.
- [5] Janson T. B., Kang, Z.L., Austin, C.A., Kurz, E.U. Salicylate, a catalytic inhibitor of Topoisomerase II, inhibitors DNA cleavage and selective for the  $\alpha$  isoform. *Mol Parmacol*, **2014**, 85, 198-207.
